# Supplementary material for: A Transcriptome Analysis: Various Reasons of Adverse Pregnancy Outcomes Caused by Acute Toxoplasma gondii Infection
Source: Front Physiol. 2020 Feb 19;11:115. doi: 10.3389/fphys.2020.00115 (PMC7042390; doi:10.3389/fphys.2020.00115)
Supplement: Supplementary file 1 [file Data_Sheet_1.XLSX]

## Sheet: DEGs.FPKM
Supplementary Data Sheet 1: Sample gene expression.
GeneID	Gene	Description	FAD6	CD6A		GeneID	Gene	Description	FBD6	CD6B		GeneID	Gene	Description	FID8	CD8
XLOC_000155	Gm2693	NA	3.48937	0		XLOC_000041	Gm30414	NA	0	0.65549		XLOC_000041	Gm30414	NA	9.75751	0.681896
XLOC_000252	Plekhb2	ENSMUSG00000026123	23.6432	8.95388		XLOC_000320	Slc9a2	NA	0	0.570892		XLOC_000063	Mcmdc2	ENSMUSG00000046101	0	1.16731
XLOC_000309	Il1r2	NA	1.60785	10.1786		XLOC_000322	Tmem182	NA	0	0.668675		XLOC_000084	Sulf1	NA	7.20369	28.3753
XLOC_000344	1500015O10Rik	ENSMUSG00000026051	25.5359	121.446		XLOC_000344	1500015O10Rik	ENSMUSG00000026051	2.01616	107.737		XLOC_000252	Plekhb2	ENSMUSG00000026123	59.9016	8.25911
XLOC_000452	Aox1	NA	14.6153	4.46283		XLOC_000370	Gm8307	NA	0.477257	0		XLOC_000317	Il18r1	NA	3.43964	0.35185
XLOC_000453	Aox3	ENSMUSG00000064294	79.501	5.83072		XLOC_000407	Stat1,Stat4	ENSMUSG00000026104	219.342	22.291		XLOC_000320	Slc9a2	NA	0	0.593924
XLOC_000569	Map2	ENSMUSG00000015222	16.4131	5.73779		XLOC_000593	Spag16	NA	0	0.802158		XLOC_000344	1500015O10Rik	ENSMUSG00000026051	9.7387	112.05
XLOC_000593	Spag16	NA	0	0.904921		XLOC_000597	Apol7d	NA	0.962204	0.166462		XLOC_000370	Gm8307	NA	1.14841	0
XLOC_000597	Apol7d	NA	0.592894	0.18773		XLOC_000611	Igfbp2	NA	6.61555	62.4383		XLOC_000407	Stat1,Stat4	ENSMUSG00000026104	88.9542	23.1897
XLOC_000641	Cyp27a1	NA	100.302	16.9831		XLOC_000630	Slc11a1	NA	39.0705	1.65363		XLOC_000593	Spag16	NA	0	0.834554
XLOC_000645	Wnt10a	NA	3.52972	22.1815		XLOC_000663	Inha	ENSMUSG00000032968	14.1005	382.868		XLOC_000597	Apol7d	NA	1.68659	0.173164
XLOC_000663	Inha	ENSMUSG00000032968	5.23368	431.31		XLOC_000717	Daw1	NA	0	1.44889		XLOC_000644	Wnt6	NA	0.656604	90.9559
XLOC_000683	Kcne4	NA	21.3673	4.08211		XLOC_000743	Gm16094	NA	0	0.751708		XLOC_000645	Wnt10a	NA	0	20.4724
XLOC_000715	Ccl20	NA	1.68591	0		XLOC_000793	Efhd1	NA	9.68768	79.7129		XLOC_000663	Inha	ENSMUSG00000032968	1.53781	398.148
XLOC_000717	Daw1	NA	0.162026	1.63435		XLOC_000801	Inpp5d	NA	21.8861	3.41299		XLOC_000683	Kcne4	NA	38.5573	3.76581
XLOC_000825	Spp2	NA	0.559515	0		XLOC_000877	Gm28382	NA	0	0.871028		XLOC_000756	2810459M11Rik	NA	11.626	0.799597
XLOC_000868	Ramp1	ENSMUSG00000034353	29.3642	10.3277		XLOC_000901	Gm29482	NA	1.94549	0		XLOC_000793	Efhd1	NA	4.83686	82.9357
XLOC_000901	Gm29482	NA	0.564205	0		XLOC_000912	Aqp12	ENSMUSG00000045091	0	0.796201		XLOC_000860	Gm9991	NA	0.646717	0
XLOC_000912	Aqp12	ENSMUSG00000045091	0	0.897364		XLOC_001012	Serpinb12	NA	0	0.85817		XLOC_000864	Mlph	ENSMUSG00000026303	14.2105	1.83491
XLOC_001061	Tfcp2l1	NA	27.3382	4.33497		XLOC_001018	Serpinb10,Serpinb2	ENSMUSG00000102843	0.813845	0		XLOC_000901	Gm29482	NA	0.521667	0
XLOC_001148	Pigr	NA	38.5754	7.92499		XLOC_001150	Il10	NA	6.74215	0		XLOC_000912	Aqp12	ENSMUSG00000045091	0	0.828043
XLOC_001191	Gm28040,Golt1a,Kiss1	ENSMUSG00000098306;ENSMUSG00000103421;ENSMUSG00000102367	1.71977	0.16566		XLOC_001191	Gm28040,Golt1a,Kiss1	ENSMUSG00000098306;ENSMUSG00000103421;ENSMUSG00000102367	6.75987	0.146908		XLOC_001012	Serpinb12	NA	0	0.892895
XLOC_001193	Etnk2	NA	0.342346	3.79941		XLOC_001193	Etnk2	NA	0.0912583	3.37159		XLOC_001078	Sctr	ENSMUSG00000026387	0.748258	0
XLOC_001216	Rabif	ENSMUSG00000042229	41.3792	13.0387		XLOC_001254	Gm37799	NA	1.05195	0		XLOC_001161	Slc26a9	ENSMUSG00000042268	3.52223	0.155152
XLOC_001393	Gm10031	NA	0	4.10752		XLOC_001351	Edem3	NA	0.481584	9.02979		XLOC_001177	Klhdc8a	NA	0.120658	4.26762
XLOC_001419	Tnr	NA	2.90184	0.320255		XLOC_001359	Nmnat2	NA	0.215156	2.45755		XLOC_001187	Gm29257	NA	0	0.651596
XLOC_001451	Gm31925	NA	0	0.931001		XLOC_001393	Gm10031	NA	0	3.64269		XLOC_001191	Gm28040,Golt1a,Kiss1	ENSMUSG00000098306;ENSMUSG00000103421;ENSMUSG00000102367	5.01219	0.152849
XLOC_001499	Dpt	NA	76.2843	5.36581		XLOC_001407	Astn1	NA	0.047975	0.673737		XLOC_001231	Lmod1	NA	28.5936	5.05517
XLOC_001606	Igsf9	NA	7.54969	1.60175		XLOC_001451	Gm31925	NA	0	0.825668		XLOC_001237	Phlda3	ENSMUSG00000041801	8.37851	39.8849
XLOC_001866	A130010J15Rik,Irf6	NA	19.4969	6.57802		XLOC_001499	Dpt	NA	219.199	4.75848		XLOC_001239	Lad1	NA	76.3811	3.86507
XLOC_001960	Ppp1r42	NA	0	0.834601		XLOC_001521	Ildr2	ENSMUSG00000040612	0.064862	0.929903		XLOC_001332	Ptgs2	ENSMUSG00000032487	0.332185	5.08327
XLOC_002062	Rims1	NA	1.59886	0.155479		XLOC_001555	Fcgr4	ENSMUSG00000059089	125.56	1.05608		XLOC_001422	4930523C07Rik	ENSMUSG00000090394	18.3431	1.67895
XLOC_002183	Neurl3	ENSMUSG00000047180	14.129	2.24807		XLOC_001605	Slamf9	NA	43.5937	1.34459		XLOC_001451	Gm31925	NA	0	0.858842
XLOC_002206	Mgat4a	ENSMUSG00000026110	7.81793	2.49842		XLOC_001672	Gm16432	NA	0	1.77031		XLOC_001499	Dpt	NA	77.4093	4.94951
XLOC_002286	Gm5526	NA	4.72616	57.3996		XLOC_001740	Dnah14	NA	1.13046	0		XLOC_001535	Rxrg	ENSMUSG00000015843	0.688517	0
XLOC_002477	Akr1cl	NA	0.21815	713.116		XLOC_001741	Gm37664	NA	11.5232	0		XLOC_001717	Lefty1	NA	0	1.70215
XLOC_002482	Cryga,D630023F18Rik,Gm28845	NA	0.200557	24.2718		XLOC_001762	Tlr5	ENSMUSG00000079164	0	1.17786		XLOC_001869	Lamb3	ENSMUSG00000026639	15.4443	0.753944
XLOC_002484	Idh1	ENSMUSG00000025950	36.3781	288.456		XLOC_001763	Gm38079	NA	0	2.20324		XLOC_001934	Gm18984	NA	1.3479	0
XLOC_002573	Ihh	NA	5.77681	22.7124		XLOC_001842	Gm37074	NA	0	1.26749		XLOC_002062	Rims1	NA	4.7625	0.143446
XLOC_002680	A630001G21Rik	NA	2.04508	0.0329836		XLOC_001866	A130010J15Rik,Irf6	NA	61.411	5.83368		XLOC_002206	Mgat4a	ENSMUSG00000026110	10.6226	2.30498
XLOC_002776	Gm29483	NA	0	0.547972		XLOC_001904	Sox17	NA	147.345	25.1432		XLOC_002288	Slc40a1	NA	31.3451	4.14993
XLOC_002799	Pdcd1	NA	0.331896	8.9576		XLOC_001916	Gm37277	NA	0.685983	0		XLOC_002347	Dnah7a	NA	0	0.669992
XLOC_002832	Gm28188	NA	0	5.15058		XLOC_001960	Ppp1r42	NA	0	0.740104		XLOC_002449	Gpr1	NA	0	1.22283
XLOC_002941	Inhbb	NA	10.6017	63.0802		XLOC_001964	Arfgef1	ENSMUSG00000067851	4.11428	28.6439		XLOC_002458	Mdh1b	NA	0	1.41095
XLOC_002999	Map3k19	NA	0	0.639026		XLOC_002062	Rims1	NA	2.31957	0.137907		XLOC_002477	Akr1cl	NA	4.74981	657.757
XLOC_003080	Btg2	NA	46.8679	15.5825		XLOC_002183	Neurl3	ENSMUSG00000047180	40.1278	1.99517		XLOC_002478	Cryge	NA	0	1.37523
XLOC_003082	Adora1	NA	0.631894	4.33259		XLOC_002347	Dnah7a	NA	0	0.643856		XLOC_002482	Cryga,D630023F18Rik,Gm28845	NA	0.0241616	22.3872
XLOC_003127	Nr5a2	NA	0.92714	28.6406		XLOC_002458	Mdh1b	NA	0	1.35644		XLOC_002484	Idh1	ENSMUSG00000025950	45.9877	266.127
XLOC_003145	Lhx9	NA	0.0586393	1.61744		XLOC_002477	Akr1cl	NA	0	632.311		XLOC_002546	Igfbp5	NA	115.044	23.5892
XLOC_003166	Cfh	NA	24.9633	74.331		XLOC_002478	Cryge	NA	0	1.32224		XLOC_002560	Gm37503	NA	0	1.88402
XLOC_003175	Rgs13	NA	0	0.486076		XLOC_002482	Cryga,D630023F18Rik,Gm28845	NA	0.0376729	21.5178		XLOC_002572	Ccdc108	NA	0	4.97875
XLOC_003280	Tdrd5	NA	0.0862661	3.51658		XLOC_002484	Idh1	ENSMUSG00000025950	21.6672	255.833		XLOC_002573	Ihh	NA	0.458097	20.9595
XLOC_003283	Soat1	NA	25.2857	87.7702		XLOC_002542	Mreg	NA	0	1.02885		XLOC_002663	Slc16a14	ENSMUSG00000026220	25.207	0.193171
XLOC_003303	Pappa2	NA	0.0471068	0.638087		XLOC_002544	March4	NA	0	0.535383		XLOC_002680	A630001G21Rik	NA	1.4391	0.0304294
XLOC_003360	Gm5705	NA	0	0.561719		XLOC_002560	Gm37503	NA	0	1.81145		XLOC_002687	Gm16341	NA	0.544728	0
XLOC_003419	Mael	NA	0	0.561681		XLOC_002572	Ccdc108	NA	0.0384089	4.78561		XLOC_002701	Alppl2	NA	0	0.697218
XLOC_003453	Hsd17b7	ENSMUSG00000026675	2.02895	85.8297		XLOC_002582	Ptprn	ENSMUSG00000026204	0	0.675193		XLOC_002726	Glrp1	NA	1.14888	0
XLOC_003542	Rgs7	ENSMUSG00000026527	0.162181	1.67673		XLOC_002618	Serpine2	NA	14.9793	120.169		XLOC_002727	Arl4c	NA	42.7388	4.07938
XLOC_003688	Kcnk2	NA	0.349162	8.38729		XLOC_002644	Slc19a3	NA	0	0.54652		XLOC_002736	Gbx2	NA	0	1.33818
XLOC_003721	Gm32460	NA	6.07461	0		XLOC_002680	A630001G21Rik	NA	1.29521	0.0292472		XLOC_002739	Iqca	NA	0	2.3394
XLOC_003754	Ppp1r14c	ENSMUSG00000040653	0	1.11685		XLOC_002687	Gm16341	NA	1.65899	0		XLOC_002748	Col6a3	NA	461.6	47.4823
XLOC_003786	Lrp11	ENSMUSG00000019796	1.31766	6.06017		XLOC_002701	Alppl2	NA	0	0.670185		XLOC_002764	Hdac4	ENSMUSG00000026313	5.96807	25.1458
XLOC_003843	Nhsl1	ENSMUSG00000039835	5.78556	1.93361		XLOC_002726	Glrp1	NA	0.721554	0		XLOC_002837	Gm28187	NA	0	1.35712
XLOC_003868	Sgk1	ENSMUSG00000019970	43.2575	137.399		XLOC_002736	Gbx2	NA	0	1.28591		XLOC_002990	Nckap5	NA	0.515728	4.18642
XLOC_003892	Vnn1	ENSMUSG00000037440	0.537782	72.3941		XLOC_002758	1700020N18Rik	NA	1.91715	0		XLOC_003059	Cntn2	NA	0.952202	0
XLOC_003932	9330159F19Rik	ENSMUSG00000004360	3.28393	0.503582		XLOC_002837	Gm28187	NA	0	1.30415		XLOC_003074	Atp2b4	NA	29.4252	7.36094
XLOC_004002	Sesn1	NA	36.7549	15.1182		XLOC_002941	Inhbb	NA	2.59864	55.9643		XLOC_003082	Adora1	NA	0.320124	3.99895
XLOC_004019	Cd24a	ENSMUSG00000047139	198.141	80.9401		XLOC_002952	Cfap221	ENSMUSG00000036962	0	0.90119		XLOC_003089	Ppp1r12b	NA	50.4013	8.17265
XLOC_004031	Speer5-ps1	NA	0	2.41728		XLOC_002956	Marco	NA	4.90263	0		XLOC_003092	Lgr6	NA	23.7053	1.56657
XLOC_004118	Spock2	ENSMUSG00000058297	26.8517	9.29829		XLOC_002990	Nckap5	NA	0.253595	4.02419		XLOC_003096	Gpr37l1	NA	0.749997	0
XLOC_004221	Chchd10	ENSMUSG00000049422	43.0294	126.747		XLOC_002999	Map3k19	NA	0	0.566702		XLOC_003098	Elf3	NA	293.017	5.60379
XLOC_004227	Slc5a4a	ENSMUSG00000020229	0	2.72669		XLOC_003082	Adora1	NA	0.247731	3.84441		XLOC_003114	Mroh3	ENSMUSG00000087230	1.36712	0
XLOC_004265	Cstb	ENSMUSG00000005054	161.699	375.525		XLOC_003089	Ppp1r12b	NA	52.7484	7.85805		XLOC_003115	5730559C18Rik	NA	13.6536	0.964296
XLOC_004344	Amh	ENSMUSG00000035262	0.530566	79.4428		XLOC_003096	Gpr37l1	NA	0.498363	0		XLOC_003127	Nr5a2	NA	0.407051	26.4308
XLOC_004375	Tle2	ENSMUSG00000034771	17.1719	65.3866		XLOC_003127	Nr5a2	NA	0.686565	25.4051		XLOC_003145	Lhx9	NA	0	1.49166
XLOC_004414	Chst11	ENSMUSG00000034612	4.70633	12.0163		XLOC_003145	Lhx9	NA	0	1.43369		XLOC_003243	Lamc2	NA	33.5458	7.17311
XLOC_004426	Tcp11l2	NA	34.4914	12.6126		XLOC_003166	Cfh	NA	8.00703	65.9054		XLOC_003271	Gm5532	NA	0	0.543832
XLOC_004443	Timp3	NA	50.1755	171.558		XLOC_003249	Npl	NA	52.6257	4.17484		XLOC_003283	Soat1	NA	11.2687	80.9673
XLOC_004552	Mgat4c	NA	0.409339	5.70551		XLOC_003280	Tdrd5	NA	0.0888447	3.1195		XLOC_003303	Pappa2	NA	0	0.588773
XLOC_004615	Tspan8	ENSMUSG00000034127	71.3578	20.6098		XLOC_003283	Soat1	NA	8.94756	77.8384		XLOC_003361	7420461P10Rik	NA	0	1.37415
XLOC_004722	Sdr9c7	ENSMUSG00000040127	0	0.90697		XLOC_003303	Pappa2	NA	0.0165803	0.566002		XLOC_003365	Fmo1	NA	38.2066	191.379
XLOC_004791	Olfr805	ENSMUSG00000096858	0	1.95016		XLOC_003312	Cacybp	NA	10.2285	56.986		XLOC_003367	Fmo2	NA	0.924862	7.14507
XLOC_004863	Adgb	NA	0.212487	1.75854		XLOC_003361	7420461P10Rik	NA	0	1.32085		XLOC_003368	Fmo6	NA	0	1.09586
XLOC_004965	Enpp3	ENSMUSG00000019989	84.5724	18.2514		XLOC_003362	Prrc2c	ENSMUSG00000040225	4.58594	22.9134		XLOC_003372	Prrx1	NA	41.5265	9.86454
XLOC_005241	Rsph14	NA	0	1.73667		XLOC_003419	Mael	NA	0	0.498025		XLOC_003419	Mael	NA	0	0.518124
XLOC_005277	Col18a1	NA	74.196	20.3269		XLOC_003453	Hsd17b7	ENSMUSG00000026675	0.861256	76.1		XLOC_003450	Rgs4	ENSMUSG00000038530	31.6516	4.42754
XLOC_005360	Gamt	ENSMUSG00000020150	16.076	50.2093		XLOC_003457	Uhmk1	NA	0.625348	7.90722		XLOC_003453	Hsd17b7	ENSMUSG00000026675	3.57672	79.1586
XLOC_005415	Tle6	ENSMUSG00000034758	3.18592	17.136		XLOC_003468	Fcgr3	NA	48.8703	4.22866		XLOC_003473	Pcp4l1	NA	316.576	30.2986
XLOC_005467	Stab2	NA	0.0724714	0.882679		XLOC_003475	Fcer1g	NA	641.222	22.0286		XLOC_003486	Gm26641	NA	0	0.611823
XLOC_005487	Ano4	NA	0.38098	5.14776		XLOC_003486	Gm26641	NA	0	0.588109		XLOC_003508	Gm37145	NA	0.652734	0
XLOC_005498	Gm24119	NA	0	2.1259		XLOC_003511	Slamf8	NA	10.7266	0.386677		XLOC_003536	Ifi202b	NA	33.9634	6.47117
XLOC_005501	Gm27366,Gm27419,Gm27544,Gm27582,Gm27608,Gm27753,Gm27999,Rmst	NA	0.642098	24.4568		XLOC_003522	Fcer1a	NA	0.597692	0		XLOC_003651	Marc1	NA	0	0.800453
XLOC_005523	Plxnc1	NA	1.0385	12.1025		XLOC_003524	Ackr1,Cadm3	NA	57.7126	3.25784		XLOC_003688	Kcnk2	NA	1.4131	7.73779
XLOC_005560	Gm22918	NA	0.716283	7.50534		XLOC_003530	AI607873,Ifi204	ENSMUSG00000073490	25.7248	3.09142		XLOC_003725	Hhat	NA	0.326663	3.91647
XLOC_005591	Acss3	NA	22.3964	8.33568		XLOC_003541	Grem2	NA	0.280134	7.57787		XLOC_003833	Cited2	ENSMUSG00000039910	11.3529	50.1149
XLOC_005650	9530003J23Rik	NA	0	0.469537		XLOC_003576	4930527J03Rik	NA	3.04455	0		XLOC_003844	Perp	ENSMUSG00000019851	78.3217	16.1174
XLOC_005789	Erbb3	ENSMUSG00000018166	8.03032	2.81121		XLOC_003651	Marc1	NA	0	0.769574		XLOC_003872	H60b,Raet1d,Raet1e	NA	0	5.6069
XLOC_005823	Olfr810	ENSMUSG00000069421	0	5.57935		XLOC_003688	Kcnk2	NA	0.327843	7.43842		XLOC_003892	Vnn1	ENSMUSG00000037440	4.33121	66.796
XLOC_005852	Gm11399	NA	0.797721	0		XLOC_003708	Atf3	NA	21.4467	1.57847		XLOC_003942	Hddc2	NA	85.0217	21.6401
XLOC_005876	Sec14l3	NA	0	4.0261		XLOC_003786	Lrp11	ENSMUSG00000019796	0.366173	5.37362		XLOC_003947	Rsph4a	ENSMUSG00000039552	0	1.54358
XLOC_005916	Aebp1	NA	84.9676	212.091		XLOC_003833	Cited2	ENSMUSG00000039910	6.88811	48.1589		XLOC_004009	Scml4	NA	35.5526	0.395194
XLOC_005949	Adcy1	ENSMUSG00000020431	1.58327	0.0938546		XLOC_003868	Sgk1	ENSMUSG00000019970	14.7447	121.833		XLOC_004019	Cd24a	ENSMUSG00000047139	630.471	74.6601
XLOC_006048	Bcl11a	ENSMUSG00000000861	0.104906	2.19325		XLOC_003892	Vnn1	ENSMUSG00000037440	2.80679	64.2018		XLOC_004031	Speer5-ps1	NA	0	2.2302
XLOC_006104	Nsg2	NA	16.809	1.08441		XLOC_004014	9030612E09Rik	ENSMUSG00000045008	0	0.708534		XLOC_004049	Bves	ENSMUSG00000071317	18.3571	2.1609
XLOC_006113	Sh3pxd2b	NA	16.9243	7.51282		XLOC_004031	Speer5-ps1	NA	0	2.14353		XLOC_004086	Gja1	ENSMUSG00000050953	80.2926	576
XLOC_006143	Pank3	NA	9.45296	21.7347		XLOC_004066	Gp49a,Lilrb4	NA	25.6216	2.18448		XLOC_004213	Ggt5	NA	82.3342	13.2956
XLOC_006202	Havcr2	ENSMUSG00000020399	0.30386	3.04429		XLOC_004086	Gja1	ENSMUSG00000050953	37.1371	553.703		XLOC_004227	Slc5a4a	ENSMUSG00000020229	0	2.51566
XLOC_006272	Gm12197	NA	0	1.34879		XLOC_004096	Fabp7	NA	0	1.13045		XLOC_004300	Misp	ENSMUSG00000035852	29.3669	1.89674
XLOC_006285	9230009I02Rik	NA	0	0.934604		XLOC_004212	Ggt1	NA	0.769447	11.2447		XLOC_004502	Tmcc3	NA	14.6238	1.85716
XLOC_006290	Col23a1	ENSMUSG00000063564	7.61728	1.56349		XLOC_004222	Vpreb3	NA	0	5.04806		XLOC_004532	Dusp6	ENSMUSG00000019960	48.1339	10.1461
XLOC_006300	Gm12204	NA	0	0.692456		XLOC_004225	Zfp280b	ENSMUSG00000049764	0.492001	9.04876		XLOC_004586	Csrp2	ENSMUSG00000020186	37.1237	190.432
XLOC_006322	Gdf9	ENSMUSG00000018238	0.540647	21.4229		XLOC_004227	Slc5a4a	ENSMUSG00000020229	0	2.41813		XLOC_004591	Gm25117	NA	9.82149	0
XLOC_006334	Mir7671	NA	1.59206	0		XLOC_004246	Itgb2	NA	34.3135	1.87928		XLOC_004615	Tspan8	ENSMUSG00000034127	138.925	19.0031
XLOC_006336	Gm12217	NA	0	0.585675		XLOC_004320	1600002K03Rik,Cirbp	NA	244.368	40.2317		XLOC_004661	Gm4473	NA	0.684388	0
XLOC_006355	Gm2a	ENSMUSG00000000594	65.9569	185.115		XLOC_004329	Plk5	ENSMUSG00000035486	0	0.823981		XLOC_004718	Gm28046,Rdh1,Rdh9	NA	0.346301	5.16152
XLOC_006453	Lrrc48	NA	1.19905	6.99505		XLOC_004508	5730420D15Rik	NA	0	0.506286		XLOC_004791	Olfr805	ENSMUSG00000096858	0	1.7993
XLOC_006580	Aloxe3	NA	0.235477	2.41922		XLOC_004552	Mgat4c	NA	0	5.05715		XLOC_004863	Adgb	NA	0.012312	1.62241
XLOC_006586	Kcnab3	NA	3.30775	22.3102		XLOC_004584	E2f7	NA	0.591621	4.47719		XLOC_004918	Myb	ENSMUSG00000019982	12.9823	1.11938
XLOC_006615	Cldn7	ENSMUSG00000018569	63.2378	13.2141		XLOC_004627	Gm10271	ENSMUSG00000069518	33.0463	4.14426		XLOC_004965	Enpp3	ENSMUSG00000019989	73.3589	16.8375
XLOC_006781	Sez6	NA	0.071556	0.547783		XLOC_004640	Mdm1	ENSMUSG00000020212	0.219388	6.71957		XLOC_004966	Arg1	ENSMUSG00000019987	79.3388	0.463091
XLOC_006794	Aldoc	NA	1.46884	12.1427		XLOC_004675	Ppm1h	NA	2.60768	14.6552		XLOC_004973	Tmem200a	ENSMUSG00000049420	6.62426	0.420536
XLOC_006801	Sebox	NA	0	0.616743		XLOC_004704	Gm6283	NA	0.610401	0		XLOC_005113	Fam162b	ENSMUSG00000019909	0	3.84147
XLOC_006807	Nos2	NA	1.03317	6.12612		XLOC_004715	Tac2	ENSMUSG00000025400	4.83631	170.861		XLOC_005159	Unc5b	ENSMUSG00000020099	1.26054	23.429
XLOC_006867	Gm11424	NA	0.463417	0		XLOC_004738	Stat2	ENSMUSG00000040033	89.0998	11.3666		XLOC_005241	Rsph14	NA	0	1.60212
XLOC_006898	Hnf1b	NA	15.7113	4.21466		XLOC_004834	Ulbp1	ENSMUSG00000079685	0.252074	4.15296		XLOC_005272	Col6a2	NA	571.744	69.2627
XLOC_006956	Mpo	NA	0.542897	0		XLOC_004860	Samd5	NA	0	3.71612		XLOC_005301	Aire	NA	0	0.574206
XLOC_006977	Gm2018	NA	2.38312	0		XLOC_004965	Enpp3	ENSMUSG00000019989	147.374	16.1858		XLOC_005333	Ppap2c	NA	99.1055	13.0874
XLOC_006978	Tmem100	NA	42.6998	8.44627		XLOC_005113	Fam162b	ENSMUSG00000019909	0	3.69234		XLOC_005360	Gamt	ENSMUSG00000020150	8.4197	46.3257
XLOC_006990	Tob1	ENSMUSG00000037573	11.4366	31.3817		XLOC_005159	Unc5b	ENSMUSG00000020099	1.39371	22.5271		XLOC_005487	Ano4	NA	0.927808	4.74803
XLOC_007043	Gm11539	NA	0	1.19607		XLOC_005206	Lrrtm3	ENSMUSG00000042846	0	0.823325		XLOC_005489	Nr1h4	NA	0	1.1703
XLOC_007047	Hoxb8	NA	40.8553	11.8764		XLOC_005261	Vpreb3	NA	0	1.38037		XLOC_005498	Gm24119	NA	0	1.96157
XLOC_007113	Grb7	NA	32.0517	7.98729		XLOC_005272	Col6a2	NA	683.135	66.5716		XLOC_005523	Plxnc1	NA	1.20403	11.164
XLOC_007174	Coasy,Hsd17b1	NA	23.5632	92.8081		XLOC_005277	Col18a1	NA	177.832	18.0422		XLOC_005560	Gm22918	NA	0	6.92347
XLOC_007297	2310007L24Rik	NA	0	4.74449		XLOC_005318	Pdxk	NA	77.9683	10.0271		XLOC_005673	Dyrk2	ENSMUSG00000028630	26.9179	6.14275
XLOC_007302	Gm11705	NA	2.94166	0		XLOC_005452	Fhl4	ENSMUSG00000050035	0	0.527285		XLOC_005694	Msrb3	ENSMUSG00000051236	48.3845	12.5148
XLOC_007331	Gm24149	NA	1.6294	0		XLOC_005487	Ano4	NA	0.392692	4.56385		XLOC_005699	Rassf3	ENSMUSG00000025795	37.2795	10.7411
XLOC_007350	Gm11682	NA	0	0.800719		XLOC_005498	Gm24119	NA	0	1.88644		XLOC_005803	Mettl7b	ENSMUSG00000025347	0	5.10487
XLOC_007357	Sox9	NA	8.98952	2.45047		XLOC_005508	Cfap54	NA	0	0.741194		XLOC_005823	Olfr810	ENSMUSG00000069421	0	5.14575
XLOC_007377	Ttyh2	ENSMUSG00000034714	3.24043	14.7531		XLOC_005523	Plxnc1	NA	1.18835	10.7336		XLOC_005865	Smtn	NA	2.32669	0
XLOC_007535	Tex19.1	NA	0	0.635676		XLOC_005565	Tmtc3	NA	0.793333	5.87315		XLOC_005876	Sec14l3	NA	0	3.71228
XLOC_007562	Fau-ps2	NA	0.533707	0		XLOC_005610	Nav3	NA	0.266125	3.68046		XLOC_005884	Lif	NA	7.41087	0.266206
XLOC_007570	Inpp5j	ENSMUSG00000034570	1.55967	8.77067		XLOC_005630	Tbc1d15	ENSMUSG00000020130	0.918847	10.5376		XLOC_005938	Ramp3	NA	316.366	10.014
XLOC_007678	Cobl	ENSMUSG00000020173	12.2783	2.77367		XLOC_005636	Lgr5	NA	0	4.30516		XLOC_005941	Gm11977	NA	4.60638	0
XLOC_007731	Lgalsl	NA	6.83938	19.5067		XLOC_005651	Lyz2	ENSMUSG00000069516	337.325	30.4301		XLOC_005949	Adcy1	ENSMUSG00000020431	4.67304	0.0865926
XLOC_007783	Gm12065	NA	0	4.24266		XLOC_005823	Olfr810	ENSMUSG00000069421	0	4.94649		XLOC_006048	Bcl11a	ENSMUSG00000000861	0.18348	2.02356
XLOC_007863	Gabrp	NA	10.4273	2.61761		XLOC_005863	Selm	ENSMUSG00000075702	442.158	77.3107		XLOC_006131	Kcnmb1	NA	22.1805	2.9204
XLOC_007872	Fbll1	NA	0	1.17947		XLOC_005865	Smtn	NA	13.2721	0		XLOC_006139	Slit3	NA	2.85853	10.556
XLOC_007923	Gm12166	ENSMUSG00000069899	0.477028	0		XLOC_005876	Sec14l3	NA	0	3.56915		XLOC_006143	Pank3	NA	5.75476	20.0444
XLOC_007926	Cyfip2	ENSMUSG00000020340	1.539	12.4281		XLOC_005917	Pold2	NA	0	2.01702		XLOC_006168	Atp10b	NA	7.67141	0.255749
XLOC_007932	Dppa1	NA	0	1.16948		XLOC_005953	Upp1	NA	72.0917	6.32146		XLOC_006194	Adam19	NA	15.7734	71.7845
XLOC_008007	Gm12205	NA	0.719138	0		XLOC_006004	Glns-ps1	NA	0	0.616953		XLOC_006208	Havcr1	NA	0	0.559689
XLOC_008193	Rnf112	NA	0.134463	6.16424		XLOC_006011	Sertad2	NA	0.787596	6.86655		XLOC_006226	Ifi47,Olfr56	ENSMUSG00000040328	78.2913	6.26413
XLOC_008244	Dnah9	ENSMUSG00000056752	0.0355801	2.89073		XLOC_006088	Gm29237	NA	0	1.74886		XLOC_006285	9230009I02Rik	NA	0	0.861727
XLOC_008259	Ntn1	NA	6.70872	1.60945		XLOC_006143	Pank3	NA	2.9282	19.2727		XLOC_006300	Gm12204	NA	0	0.639059
XLOC_008277	Gm22442	NA	19.209	0		XLOC_006194	Adam19	NA	10.044	69.0136		XLOC_006322	Gdf9	ENSMUSG00000018238	0.167655	19.7654
XLOC_008291	Atp1b2	ENSMUSG00000041329	14.6076	48.9252		XLOC_006208	Havcr1	NA	0	0.537918		XLOC_006329	Rps2-ps4	NA	0	3.13466
XLOC_008295	Shbg	NA	0	1.60745		XLOC_006226	Ifi47,Olfr56	ENSMUSG00000040328	475.653	6.02287		XLOC_006335	Irf1	NA	116.619	18.1723
XLOC_008312	Spem1	NA	0.587939	0		XLOC_006229	Zfp62	NA	0.724153	6.0735		XLOC_006336	Gm12217	NA	0	0.540938
XLOC_008333	Alox12e	NA	16.7781	2.3709		XLOC_006249	Scgb3a1	NA	0	5.30619		XLOC_006355	Gm2a	ENSMUSG00000000594	22.1544	170.794
XLOC_008493	Slc13a2	NA	9.16366	1.65766		XLOC_006257	Rasgef1c	NA	0.499529	0		XLOC_006360	Gm22884	NA	10.0713	0
XLOC_008564	Gas2l2	ENSMUSG00000020686	0	0.6889		XLOC_006285	9230009I02Rik	NA	0	0.828426		XLOC_006367	Gria1	NA	4.81773	0.238616
XLOC_008646	Gm15698	NA	1.32142	21.9485		XLOC_006290	Col23a1	ENSMUSG00000063564	9.17274	1.3874		XLOC_006386	Gm12250	NA	18.3648	0.486234
XLOC_008652	Nog	NA	35.1448	3.85041		XLOC_006300	Gm12204	NA	0	0.61443		XLOC_006387	Igtp,Irgm2	ENSMUSG00000078853;ENSMUSG00000069874	173.441	10.1496
XLOC_008774	Srcin1	NA	0.436767	5.5458		XLOC_006303	Gm26551	NA	23.3571	0		XLOC_006432	Wnt9a	NA	10.7587	1.04542
XLOC_008803	Ikzf3	NA	2.42975	0.241285		XLOC_006322	Gdf9	ENSMUSG00000018238	0.914008	19.0018		XLOC_006554	Pik3r5	NA	3.33692	0.519621
XLOC_008815	Casc3	NA	0.72445	0		XLOC_006335	Irf1	NA	223.605	17.4676		XLOC_006580	Aloxe3	NA	0	2.23189
XLOC_008837	Krt23	NA	28.0577	8.7307		XLOC_006341	Acsl6	ENSMUSG00000020333	2.3467	0.0769828		XLOC_006586	Kcnab3	NA	1.31276	20.5874
XLOC_008948	Ppy	NA	0.693944	0		XLOC_006386	Gm12250	NA	65.9423	0.467387		XLOC_006615	Cldn7	ENSMUSG00000018569	429.158	12.1908
XLOC_008949	Pyy	ENSMUSG00000017311	2.55374	36.5693		XLOC_006387	Igtp,Irgm2	ENSMUSG00000078853;ENSMUSG00000069874	765.404	9.7561		XLOC_006624	Asgr1	NA	0	0.668125
XLOC_008974	Gm11636	NA	1.11214	0		XLOC_006422	Gm12257	NA	1.51653	0		XLOC_006625	Asgr2	ENSMUSG00000040963	0	0.843848
XLOC_009085	E030025P04Rik	NA	0.697677	0		XLOC_006424	Hist3h2ba	NA	8.59694	0		XLOC_006807	Nos2	NA	0.295684	5.6529
XLOC_009133	Fdxr	NA	17.1395	175.478		XLOC_006498	2410006H16Rik	NA	1929.99	276.068		XLOC_006870	Slfn1	ENSMUSG00000078763	0.567051	0
XLOC_009134	Fads6	NA	0.219009	8.51425		XLOC_006511	Tvp23b	NA	2.11573	21.0213		XLOC_006955	Bzrap1	NA	8.10439	1.23044
XLOC_009135	Ush1g	NA	0	0.630598		XLOC_006554	Pik3r5	NA	12.9957	0.499617		XLOC_006956	Mpo	NA	2.27378	0
XLOC_009171	Foxj1	NA	0.265159	13.2814		XLOC_006557	Ccdc42	NA	0	2.53671		XLOC_006976	Gm525	NA	0	0.633289
XLOC_009244	Aatk	ENSMUSG00000025375	0.376741	6.69294		XLOC_006588	Gm17305	NA	0	0.799345		XLOC_007022	Gm11528	NA	1.18329	0
XLOC_009289	Sectm1b	NA	13.005	0.582957		XLOC_006615	Cldn7	ENSMUSG00000018569	210.522	11.7193		XLOC_007032	4833417C18Rik	NA	0	0.524872
XLOC_009535	Efcab10	ENSMUSG00000020562	0	2.76706		XLOC_006624	Asgr1	NA	0	0.642599		XLOC_007049	Hoxb7	NA	46.6435	6.77511
XLOC_009544	Agr3	NA	0	2.23155		XLOC_006625	Asgr2	ENSMUSG00000040963	0	0.811498		XLOC_007106	Ppp1r1b	ENSMUSG00000061718	17.7329	2.32959
XLOC_009545	Agr2	NA	122.995	28.7557		XLOC_006646	4930544D05Rik	NA	0.906587	0		XLOC_007113	Grb7	NA	35.4836	7.37118
XLOC_009593	Coch	ENSMUSG00000020953	20.7781	50.4242		XLOC_006669	Xaf1	NA	259.864	13.7431		XLOC_007174	Coasy,Hsd17b1	NA	12.7606	85.6244
XLOC_009665	Gm6395	NA	0	0.745595		XLOC_006682	Atp2a3	NA	26.5911	4.46445		XLOC_007201	Arl4d	ENSMUSG00000034936	22.6145	87.1644
XLOC_009706	Frmd6	ENSMUSG00000048285	22.9076	9.43325		XLOC_006753	Glod4	ENSMUSG00000017286	0	0.654075		XLOC_007211	Nags	NA	0	4.67193
XLOC_009789	Rdh12	ENSMUSG00000021123	19.2777	0.882477		XLOC_006801	Sebox	NA	0	0.547215		XLOC_007230	Adam11	ENSMUSG00000020926	0.789206	8.95879
XLOC_009832	Plekhd1	NA	0.520205	20.8935		XLOC_006868	Slfn2	ENSMUSG00000072620	40.5012	3.82799		XLOC_007250	Gm11642	NA	0	1.69455
XLOC_009879	Vrtn	ENSMUSG00000071235	0	0.880219		XLOC_006870	Slfn1	ENSMUSG00000078763	5.06208	0		XLOC_007256	Mapt	NA	0.0277893	1.90716
XLOC_009944	Gm2042	NA	0.372468	2.22043		XLOC_006872	Slfn3	NA	21.3633	1.43403		XLOC_007259	Myl4	NA	24.4478	2.76161
XLOC_009954	Nrxn3	NA	0.57377	0.0202403		XLOC_006939	Tex14	NA	0.0995496	3.85131		XLOC_007280	Tanc2	NA	0.93872	5.05751
XLOC_010007	Slc24a4	ENSMUSG00000041771	0	0.775737		XLOC_006990	Tob1	ENSMUSG00000037573	1.8375	27.8278		XLOC_007297	2310007L24Rik	NA	0	4.38062
XLOC_010028	Serpina5	ENSMUSG00000041550	0	10.7971		XLOC_007040	Ttll6	NA	0	1.36729		XLOC_007352	Kcnj16	NA	0	2.8899
XLOC_010031	Serpina3a	NA	0	8.37641		XLOC_007047	Hoxb8	NA	82.1179	10.54		XLOC_007377	Ttyh2	ENSMUSG00000034714	1.28183	13.6131
XLOC_010045	Tcl1b2	NA	0	1.05689		XLOC_007120	Csf3	NA	16.4153	0.535767		XLOC_007378	Dnaic2	ENSMUSG00000034706	0.214135	3.57296
XLOC_010046	Tcl1b1	NA	0	0.959371		XLOC_007190	Ifi35	ENSMUSG00000010358	163.984	27.7734		XLOC_007414	Itgb4	ENSMUSG00000020758	25.3919	3.98365
XLOC_010049	Tcl1b4	NA	0	0.7436		XLOC_007211	Nags	NA	0	4.49093		XLOC_007464	C1qtnf1	ENSMUSG00000017446	5.27052	30.2933
XLOC_010051	D430019H16Rik	ENSMUSG00000094910	3.28402	0.696289		XLOC_007237	Gfap	NA	2.12278	0		XLOC_007467	Enpp7	NA	0	2.24395
XLOC_010057	Ak7	ENSMUSG00000041323	0.287809	4.36987		XLOC_007238	Kif18b	NA	7.87657	0		XLOC_007471	Cbx2	NA	2.25033	29.6958
XLOC_010254	Vipr2	NA	4.93032	0.361841		XLOC_007250	Gm11642	NA	0	1.62943		XLOC_007535	Tex19.1	NA	0	0.586708
XLOC_010312	Gdf7	ENSMUSG00000037660	14.7343	2.40177		XLOC_007280	Tanc2	NA	0.884849	4.86165		XLOC_007650	Igfbp3	NA	12.6541	289.116
XLOC_010349	Greb1	NA	5.62416	34.7731		XLOC_007285	Ace	NA	17.623	2.91189		XLOC_007657	Tns3	NA	10.9204	47.4365
XLOC_010354	2410004P03Rik	NA	0.16847	2.7961		XLOC_007396	Slc16a5	NA	0	2.10317		XLOC_007783	Gm12065	NA	0	3.91466
XLOC_010355	Kcnf1	NA	0.78494	4.29269		XLOC_007467	Enpp7	NA	0	2.15702		XLOC_007838	D630024D03Rik	NA	0	0.6939
XLOC_010390	9030624G23Rik	ENSMUSG00000073158	1.17207	0		XLOC_007471	Cbx2	NA	2.32536	28.548		XLOC_007900	Fabp6	ENSMUSG00000020405	7.24555	0
XLOC_010408	Colec11	NA	0	4.28887		XLOC_007505	Slc25a10	NA	120.29	23.5548		XLOC_007926	Cyfip2	ENSMUSG00000020340	1.80704	11.4659
XLOC_010442	Prkar2b	ENSMUSG00000002997	4.56406	53.3536		XLOC_007520	Hmga1-rs1	NA	29.1188	2.06844		XLOC_007932	Dppa1	NA	0	1.0787
XLOC_010461	Tspan13	ENSMUSG00000020577	44.6212	14.5842		XLOC_007535	Tex19.1	NA	0	0.564233		XLOC_007933	Gm4926	NA	0	0.623361
XLOC_010603	4930447C04Rik	NA	5.08093	0.522754		XLOC_007672	Fignl1	NA	0.442037	8.2461		XLOC_007949	Irgm1	NA	195.666	13.8615
XLOC_010615	Gm11042	ENSMUSG00000079061	3.78149	0		XLOC_007678	Cobl	ENSMUSG00000020173	18.4899	2.45945		XLOC_008007	Gm12205	NA	0.843981	0
XLOC_010767	Gm26698	NA	0.947084	0		XLOC_007801	Gm6685	ENSMUSG00000032889	0	1.21387		XLOC_008041	Slc22a5	ENSMUSG00000018900	11.1531	57.6843
XLOC_010802	Dio2	ENSMUSG00000007682	18.9146	1.93245		XLOC_007813	Gm12091	NA	1.1184	0		XLOC_008071	Nmur2	NA	9.74776	0.71354
XLOC_010808	Ston2	NA	0.32925	2.28158		XLOC_007838	D630024D03Rik	NA	0	0.667285		XLOC_008084	Gm12248	NA	41.0185	2.55272
XLOC_010891	Serpina1e	ENSMUSG00000072849	68.5716	12.0487		XLOC_007872	Fbll1	NA	0	1.04554		XLOC_008107	Fam183b	ENSMUSG00000049154	0	28.3112
XLOC_010934	Gm23872	NA	0	1.22511		XLOC_007900	Fabp6	ENSMUSG00000020405	1.93397	0		XLOC_008193	Rnf112	NA	0.211746	5.68835
XLOC_010969	Gm17111	NA	0.130266	0.58225		XLOC_007932	Dppa1	NA	0	1.03658		XLOC_008244	Dnah9	ENSMUSG00000056752	0	2.66753
XLOC_011240	Ighv8-12	NA	0	1.74433		XLOC_007933	Gm4926	NA	0	0.599293		XLOC_008259	Ntn1	NA	11.07	1.4854
XLOC_011287	Itgb8	NA	2.01819	0.182484		XLOC_007949	Irgm1	NA	263.156	13.3224		XLOC_008295	Shbg	NA	0	1.48334
XLOC_011314	Calm4	ENSMUSG00000033765	0	0.769571		XLOC_008007	Gm12205	NA	0.624899	0		XLOC_008312	Spem1	NA	0.707697	0
XLOC_011317	Akr1c14	NA	5.37892	50.7548		XLOC_008041	Slc22a5	ENSMUSG00000018900	8.34834	55.4602		XLOC_008317	Acap1	NA	0.89862	8.26597
XLOC_011335	Idi1	ENSMUSG00000058258	27.883	68.4571		XLOC_008057	Lyrm7	NA	0.861744	19.8921		XLOC_008321	Slc2a4	NA	24.9581	3.5302
XLOC_011350	Gm2399	ENSMUSG00000078141	4.63432	0		XLOC_008142	Flcn	NA	1.29675	14.608		XLOC_008329	Bcl6b	ENSMUSG00000000317	1.5541	10.9912
XLOC_011361	Prl2c5	NA	0	0.700545		XLOC_008188	Slc47a1	NA	0	3.23429		XLOC_008380	Tekt1	ENSMUSG00000020799	0	3.5254
XLOC_011379	Inhba	ENSMUSG00000041324	0.769548	15.4219		XLOC_008197	B9d1os	NA	0	1.26004		XLOC_008390	4732414G09Rik	NA	0.875375	0
XLOC_011411	Sfrp4	ENSMUSG00000021319	122.805	612.644		XLOC_008244	Dnah9	ENSMUSG00000056752	0	2.56413		XLOC_008396	Aspa	ENSMUSG00000020774	11.0221	0.776645
XLOC_011423	AK157302	NA	0	0.972449		XLOC_008295	Shbg	NA	0	1.4262		XLOC_008538	Asic2	NA	31.9483	1.84757
XLOC_011552	Prl3c1	ENSMUSG00000017922	11.5988	218.055		XLOC_008300	Cd68	NA	76.5478	5.07239		XLOC_008564	Gas2l2	ENSMUSG00000020686	0	0.635888
XLOC_011561	Prl8a2	NA	14.6446	1390.55		XLOC_008312	Spem1	NA	0.858286	0		XLOC_008646	Gm15698	NA	0	20.2434
XLOC_011609	Serpinb9b	NA	42.0126	113.618		XLOC_008334	Alox15	ENSMUSG00000018924	53.406	6.50791		XLOC_008684	Cacna1g	NA	46.488	8.51685
XLOC_011658	Dsp	ENSMUSG00000054889	2.45905	7.58399		XLOC_008339	Cxcl16	ENSMUSG00000018920	47.0686	2.53225		XLOC_008688	Acsf2,Rsad1	ENSMUSG00000076435;ENSMUSG00000039096	7.11801	31.4458
XLOC_011719	Rbm24	ENSMUSG00000038132	8.85313	2.10985		XLOC_008340	Vmo1	NA	1.88846	0		XLOC_008693	Gm11545	NA	10.5979	1.33639
XLOC_011728	2010001K21Rik	NA	0	2.00868		XLOC_008355	Scimp	NA	3.80748	0		XLOC_008718	Ngfr	NA	74.8877	2.47456
XLOC_011806	Eif4e1b	NA	0	6.57522		XLOC_008436	Gm12335	NA	0.529742	0		XLOC_008728	Igf2bp1	NA	0	0.664107
XLOC_011875	Gm5084	NA	0.406289	0		XLOC_008507	Lgals9	NA	394.901	52.5124		XLOC_008733	Calcoco2	NA	0	0.77456
XLOC_011964	9430065F17Rik	NA	0.503167	0		XLOC_008524	9130204K15Rik	NA	0	0.788646		XLOC_008761	Lrrc46	NA	0	2.52825
XLOC_012005	Slc12a7	ENSMUSG00000017756	10.8595	39.128		XLOC_008564	Gas2l2	ENSMUSG00000020686	0	0.611248		XLOC_008774	Srcin1	NA	0.700621	5.11999
XLOC_012009	Tppp	NA	4.64396	1.06893		XLOC_008571	Ccl3	NA	19.4466	0		XLOC_008793	Stac2	NA	1.23456	8.75558
XLOC_012010	Slc9a3	ENSMUSG00000036123	0	0.531045		XLOC_008638	2010015M23Rik	NA	0	0.668996		XLOC_008803	Ikzf3	NA	8.31839	0.22262
XLOC_012280	Hmgcs1	ENSMUSG00000093930	24.2135	155.625		XLOC_008664	Stxbp4	ENSMUSG00000020546	0.182127	2.66964		XLOC_008834	Krt20	NA	30.4799	0.662252
XLOC_012315	Akr1c18	NA	0.455558	130.505		XLOC_008693	Gm11545	NA	19.6834	1.28464		XLOC_008887	Krt19	NA	650.363	95.6033
XLOC_012364	Gm2423	NA	0	0.732796		XLOC_008724	Gngt2	ENSMUSG00000038811	0	0.802159		XLOC_008949	Pyy	ENSMUSG00000017311	0	33.7422
XLOC_012400	Epdr1	ENSMUSG00000002808	24.424	56.0051		XLOC_008733	Calcoco2	NA	0	0.744596		XLOC_008974	Gm11636	NA	1.89381	0
XLOC_012442	Hist1h1b	NA	0.774969	0		XLOC_008807	Gm12356	NA	1.3407	0		XLOC_009048	Tex2	NA	73.313	13.4024
XLOC_012522	Hist1h4c	ENSMUSG00000060678	2.41947	0		XLOC_008817	Gjd3	ENSMUSG00000047197	2.50335	0		XLOC_009067	Cacng4	NA	0	0.567382
XLOC_012566	Prl8a9	NA	0.804397	46.866		XLOC_008877	Krtap17-1	NA	2.12697	0		XLOC_009085	E030025P04Rik	NA	2.4536	0
XLOC_012609	Gm11377	NA	0	1.01541		XLOC_008891	Krt16	ENSMUSG00000053797	1.09479	0		XLOC_009097	Abca8a	NA	0.132906	1.95269
XLOC_012651	Nrn1	ENSMUSG00000039114	11.598	44.9896		XLOC_008948	Ppy	NA	7.69135	0		XLOC_009132	Grin2c	NA	0	2.3238
XLOC_012676	Mak	ENSMUSG00000021363	0.0885139	1.20165		XLOC_008949	Pyy	ENSMUSG00000017311	0	32.4325		XLOC_009133	Fdxr	NA	8.36676	161.935
XLOC_012735	Susd3	ENSMUSG00000021384	0.97618	19.0773		XLOC_008963	Grn	NA	5.44141	0.24883		XLOC_009135	Ush1g	NA	0	0.58206
XLOC_012821	Pitx1	NA	0	0.58657		XLOC_008985	Gm26668	NA	0	4.16569		XLOC_009167	Evpl	NA	4.27228	0.586021
XLOC_013014	Nkd2	NA	11.6948	3.68042		XLOC_008991	Gm26668	NA	0	3.22748		XLOC_009171	Foxj1	NA	0.515275	12.2614
XLOC_013112	Thbs4	ENSMUSG00000021702	7.33187	21.9265		XLOC_009035	Gm11646	NA	0.945059	0		XLOC_009190	Gm11730	NA	0	1.25763
XLOC_013119	Bhmt	NA	0.993078	61.4436		XLOC_009119	Btbd17	ENSMUSG00000000202	0	0.996884		XLOC_009216	Lgals3bp	ENSMUSG00000033880	222.506	45.8199
XLOC_013143	Hmgcr	NA	13.4029	51.5321		XLOC_009132	Grin2c	NA	0	2.23395		XLOC_009244	Aatk	ENSMUSG00000025375	0.316008	6.17805
XLOC_013147	Hexb	ENSMUSG00000021665	79.7693	26.4992		XLOC_009135	Ush1g	NA	0	0.559595		XLOC_009272	Notum	NA	0.297678	24.3697
XLOC_013173	Map1b	ENSMUSG00000052727	2.57196	8.35793		XLOC_009141	Gm11695	NA	0	3.24528		XLOC_009277	Dcxr	NA	95.6809	18.5465
XLOC_013364	Gm26655	NA	0	3.50713		XLOC_009216	Lgals3bp	ENSMUSG00000033880	1045.59	44.0523		XLOC_009278	Cbr2	NA	607.07	11.9549
XLOC_013436	Sntn	NA	0	6.58232		XLOC_009267	Alyref	NA	5.79516	53.707		XLOC_009370	Osr1	ENSMUSG00000048387	18.8516	2.44003
XLOC_013535	Dnah12	NA	0	1.47977		XLOC_009272	Notum	NA	0.903132	23.432		XLOC_009483	Rrm2	NA	26.3145	385.005
XLOC_013578	Galnt15	NA	22.0983	4.46869		XLOC_009277	Dcxr	NA	337.691	17.8341		XLOC_009535	Efcab10	ENSMUSG00000020562	0	2.55334
XLOC_013607	Gdf10	ENSMUSG00000021943	29.2613	9.64385		XLOC_009278	Cbr2	NA	1331.37	11.4931		XLOC_009544	Agr3	NA	0	2.05862
XLOC_013615	Syt15	NA	9.73532	2.64961		XLOC_009289	Sectm1b	NA	7.76612	0.517005		XLOC_009593	Coch	ENSMUSG00000020953	0.263819	46.5143
XLOC_013725	Gm1821	NA	49.4695	5.78933		XLOC_009388	Gm4294	NA	2.00297	0		XLOC_009776	Fut8	ENSMUSG00000021065	10.7256	45.2822
XLOC_013739	Lgals3	NA	24.0475	72.8556		XLOC_009429	5730507C01Rik	ENSMUSG00000073197	0	1.02		XLOC_009830	Galnt16	ENSMUSG00000021130	28.2502	4.69634
XLOC_013798	Ear6	ENSMUSG00000062148	0	2.92306		XLOC_009483	Rrm2	NA	5.41716	370.093		XLOC_009832	Plekhd1	NA	1.24293	19.2778
XLOC_014104	Fgf9	ENSMUSG00000021974	7.10121	1.37111		XLOC_009535	Efcab10	ENSMUSG00000020562	0	2.45489		XLOC_009879	Vrtn	ENSMUSG00000071235	0	0.812176
XLOC_014171	Scara5	NA	19.1631	2.78917		XLOC_009544	Agr3	NA	0	1.97831		XLOC_009938	Oog1	ENSMUSG00000096576	0	1.72616
XLOC_014198	Stc1	ENSMUSG00000014813	3.52156	22.3132		XLOC_009548	Sostdc1	ENSMUSG00000036169	0.738537	0		XLOC_009944	Gm2042	NA	0.0677089	2.04816
XLOC_014248	Snora31	NA	0	35.9584		XLOC_009593	Coch	ENSMUSG00000020953	1.09805	44.7201		XLOC_010028	Serpina5	ENSMUSG00000041550	0	9.96312
XLOC_014377	Cldn10	ENSMUSG00000022132	78.5644	16.9905		XLOC_009640	Gm2568	NA	128.322	0		XLOC_010031	Serpina3a	NA	0	7.72548
XLOC_014506	Acox2	ENSMUSG00000021751	0	1.54091		XLOC_009643	Sstr1	NA	0	0.754785		XLOC_010037	Serpina3k,Serpina3m,Serpina3n	NA	2.15892	14.2826
XLOC_014507	Fam107a	ENSMUSG00000021750	0.21662	2.6611		XLOC_009665	Gm6395	NA	0	0.661126		XLOC_010045	Tcl1b2	NA	0	0.974807
XLOC_014508	Oit1	NA	39.3785	9.04986		XLOC_009832	Plekhd1	NA	1.33099	18.5327		XLOC_010046	Tcl1b1	NA	0	0.884968
XLOC_014671	1700024G13Rik	NA	0	7.60953		XLOC_009879	Vrtn	ENSMUSG00000071235	0	0.780885		XLOC_010049	Tcl1b4	NA	0	0.68565
XLOC_014880	1700011H14Rik	NA	9.33473	0.949063		XLOC_010028	Serpina5	ENSMUSG00000041550	0	9.57638		XLOC_010094	Dlk1	NA	0	5.59183
XLOC_014920	Ang2	ENSMUSG00000047894	0	2.0726		XLOC_010031	Serpina3a	NA	0	7.42679		XLOC_010170	Dio3	ENSMUSG00000075707	0.673097	280.229
XLOC_014921	Rnase2a	ENSMUSG00000047222	0	7.47064		XLOC_010033	Serpina3f,Serpina3g	ENSMUSG00000066363	468.725	6.86647		XLOC_010190	Tnfaip2	NA	7.8669	90.932
XLOC_014973	RP24-378G4.3	NA	124.662	30.0728		XLOC_010037	Serpina3k,Serpina3m,Serpina3n	NA	149.747	13.7304		XLOC_010199	Tdrd9	NA	0.044745	0.906697
XLOC_015041	Gzmb	ENSMUSG00000015437	8.51675	27.037		XLOC_010045	Tcl1b2	NA	0	0.937175		XLOC_010200	Aspg	ENSMUSG00000037686	0.751027	28.0785
XLOC_015161	Ephx2	ENSMUSG00000022040	1.47927	324.637		XLOC_010046	Tcl1b1	NA	0	0.850932		XLOC_010205	Inf2	ENSMUSG00000037679	9.21896	76.8941
XLOC_015183	Adamdec1	ENSMUSG00000022057	12.0191	0.647592		XLOC_010049	Tcl1b4	NA	0	0.659215		XLOC_010275	Macc1	NA	10.0117	0.653232
XLOC_015217	Sftpc	ENSMUSG00000022097	0	2.11024		XLOC_010053	Bdkrb2	ENSMUSG00000021070	6.58308	0.604031		XLOC_010346	Trib2	NA	6.71427	35.0832
XLOC_015264	Slc25a30	ENSMUSG00000022003	7.28737	20.3082		XLOC_010057	Ak7	ENSMUSG00000041323	0	3.87472		XLOC_010354	2410004P03Rik	NA	0	2.58066
XLOC_015284	Fam216b	NA	0	2.82204		XLOC_010170	Dio3	ENSMUSG00000075707	1.44966	269.389		XLOC_010408	Colec11	NA	0	3.95796
XLOC_015292	Zfp957	ENSMUSG00000071262	0	0.51911		XLOC_010199	Tdrd9	NA	0	0.87163		XLOC_010442	Prkar2b	ENSMUSG00000002997	3.1535	49.2043
XLOC_015293	Rgcc	ENSMUSG00000022018	15.6762	62.5163		XLOC_010212	Pld4	ENSMUSG00000052160	94.2803	4.92607		XLOC_010448	Cdhr3	ENSMUSG00000035860	0	3.01215
XLOC_015302	Lect1	ENSMUSG00000022025	1.02641	33.5264		XLOC_010323	Pgk1-rs7	ENSMUSG00000066632	1.02576	0		XLOC_010461	Tspan13	ENSMUSG00000020577	134.336	13.4552
XLOC_015469	C9	NA	0.813593	0		XLOC_010331	Gen1	ENSMUSG00000051235	0	1.58864		XLOC_010502	Egln3	ENSMUSG00000035105	26.4471	1.15865
XLOC_015486	Gm2310	NA	0.649475	0		XLOC_010349	Greb1	NA	4.47895	30.8398		XLOC_010609	Tmem30b	ENSMUSG00000034435	17.1114	1.05343
XLOC_015495	Agxt2,Gm21973,Prlr	ENSMUSG00000089678;ENSMUSG00000005268	2.03304	21.1348		XLOC_010354	2410004P03Rik	NA	0	2.48133		XLOC_010615	Gm11042	ENSMUSG00000079061	1.23542	0
XLOC_015555	Cmbl	NA	2.73625	32.6242		XLOC_010355	Kcnf1	NA	0	3.80816		XLOC_010796	Gm8332	ENSMUSG00000095799	0	2.25904
XLOC_015578	Osr2	ENSMUSG00000022330	79.5764	24.637		XLOC_010408	Colec11	NA	0	3.80519		XLOC_010802	Dio2	ENSMUSG00000007682	121.313	1.78292
XLOC_015584	Spag1	ENSMUSG00000037617	2.11001	7.12248		XLOC_010435	Slc26a4	ENSMUSG00000020651	0	1.07381		XLOC_010852	Tc2n	NA	6.68833	0.448984
XLOC_015613	Fzd6	ENSMUSG00000022297	21.1047	7.78484		XLOC_010442	Prkar2b	ENSMUSG00000002997	3.04542	47.2965		XLOC_010859	Lgmn	NA	29.4416	100.837
XLOC_015680	Sqle	ENSMUSG00000022351	15.6756	48.3545		XLOC_010448	Cdhr3	ENSMUSG00000035860	0	2.89501		XLOC_010867	Asb2	ENSMUSG00000021200	34.3614	3.78061
XLOC_015754	Ly6g	NA	0	1.47073		XLOC_010496	Gpr33	ENSMUSG00000035148	0.973734	0		XLOC_010873	Ifi27l2b	NA	2.30564	0
XLOC_015819	Apol6	ENSMUSG00000033576	0.416113	24.7861		XLOC_010604	Six1	ENSMUSG00000051367	1.27947	0		XLOC_010876	Serpina6	NA	0	0.652959
XLOC_015826	Apol7e	ENSMUSG00000071716	0.222629	3.36153		XLOC_010630	Esr2	NA	0	9.29024		XLOC_010911	Tcl1	NA	0	5.106
XLOC_015923	Cyp2d12	ENSMUSG00000096852	0	1.73352		XLOC_010690	Plekhd1os	NA	0	1.14865		XLOC_010934	Gm23872	NA	0	1.1307
XLOC_015946	Parvb	NA	7.15693	21.4633		XLOC_010722	Dpf3	NA	0.292516	5.55703		XLOC_010940	Slc25a29	ENSMUSG00000021265	2.72035	26.671
XLOC_016017	Adm2	ENSMUSG00000054136	0	0.692108		XLOC_010733	Gm5436	NA	0	2.03863		XLOC_010957	Mir1247	NA	2.61451	26.4832
XLOC_016018	Miox	NA	0	5.95719		XLOC_010767	Gm26698	NA	0.619149	0		XLOC_010986	Ckb	ENSMUSG00000001270	482.795	65.029
XLOC_016115	Aqp5	ENSMUSG00000044217	91.8632	19.8085		XLOC_010796	Gm8332	ENSMUSG00000095799	0	2.17139		XLOC_011314	Calm4	ENSMUSG00000033765	0	0.709945
XLOC_016128	Gm21917	NA	0.51295	0		XLOC_010821	Gm6863	NA	0	1.10092		XLOC_011317	Akr1c14	NA	181.658	46.8054
XLOC_016177	Krt7	NA	31.777	7.19392		XLOC_010823	Galc	ENSMUSG00000021003	0.529403	8.47583		XLOC_011320	Akr1c19	ENSMUSG00000071551	19.9621	1.9177
XLOC_016202	Amhr2	NA	1.82255	19.0521		XLOC_010867	Asb2	ENSMUSG00000021200	26.6976	3.63408		XLOC_011361	Prl2c5	NA	0	0.645977
XLOC_016222	Hoxc6	ENSMUSG00000001661	0.79783	12.6003		XLOC_010872	Ifi27l2a	NA	1406.86	23.3263		XLOC_011379	Inhba	ENSMUSG00000041324	2.51462	14.2291
XLOC_016224	Hoxc4	NA	0.352975	5.18181		XLOC_010873	Ifi27l2b	NA	0.855757	0		XLOC_011411	Sfrp4	ENSMUSG00000021319	9.92508	565.469
XLOC_016227	D930007P13Rik	NA	0	0.871527		XLOC_010876	Serpina6	NA	0	0.627488		XLOC_011549	Prl3d1	NA	0	1.07076
XLOC_016365	Rnf19a	ENSMUSG00000022280	10.5597	30.1589		XLOC_010891	Serpina1e	ENSMUSG00000072849	158.719	10.6842		XLOC_011552	Prl3c1	ENSMUSG00000017922	0	201.141
XLOC_016377	Gm10384	ENSMUSG00000072618	0	0.898747		XLOC_010911	Tcl1	NA	0	4.90736		XLOC_011559	Prl6a1	NA	4.96746	38.0743
XLOC_016459	Enpp2	ENSMUSG00000022425	14.7527	2.18216		XLOC_010934	Gm23872	NA	0	1.08704		XLOC_011607	Serpinb6b	NA	5.78601	153.969
XLOC_016482	Fbxo32	ENSMUSG00000022358	13.126	3.47639		XLOC_010941	Wars	NA	616.177	69.5375		XLOC_011609	Serpinb9b	NA	0.277427	104.823
XLOC_016520	Lrrc6	ENSMUSG00000022375	0	0.742874		XLOC_010957	Mir1247	NA	1.53598	25.4608		XLOC_011612	Serpinb9e	NA	0	5.16197
XLOC_016527	St3gal1	ENSMUSG00000013846	29.1376	12.5103		XLOC_010969	Gm17111	NA	0	0.51677		XLOC_011613	Serpinb9f	NA	0	0.556858
XLOC_016562	Gm3244	NA	0	5.43174		XLOC_010986	Ckb	ENSMUSG00000001270	694.218	62.4899		XLOC_011615	Serpinb9g	NA	0	0.713342
XLOC_016565	Mroh4	ENSMUSG00000022603	0	0.72939		XLOC_011021	Igha	NA	196.477	10.737		XLOC_011676	Sycp2l	NA	0	0.799114
XLOC_016575	Gml	ENSMUSG00000068349	0	0.794219		XLOC_011026	Ighg3	ENSMUSG00000076615	1.98092	0		XLOC_011720	Cap2	ENSMUSG00000021373	22.1224	3.41033
XLOC_016649	Slc39a4	ENSMUSG00000063354	376.891	57.1687		XLOC_011030	Ighm	ENSMUSG00000076617	48.2303	3.30642		XLOC_011733	Id4	ENSMUSG00000021379	25.1001	3.54221
XLOC_016692	Tst	ENSMUSG00000044986	9.76455	55.1357		XLOC_011120	Ighv7-3	NA	3.38331	0		XLOC_011749	Ogn	ENSMUSG00000021390	246.459	45.322
XLOC_016820	Efcab6	ENSMUSG00000022441	0.0415236	0.83268		XLOC_011127	Ighv3-5	ENSMUSG00000076670	8.38128	0		XLOC_011779	Gadd45g	ENSMUSG00000021453	285.382	57.0504
XLOC_016832	Wnt7b	ENSMUSG00000022382	26.2217	6.93683		XLOC_011264	Ighv1-84	NA	5.4429	0		XLOC_011806	Eif4e1b	NA	0	6.06868
XLOC_016947	Wnt10b	ENSMUSG00000022996	0.558456	36.7744		XLOC_011267	Ighv1-86	NA	4.66895	0		XLOC_011836	Slc25a48	NA	25.7989	2.92458
XLOC_017022	5430421N21Rik	NA	47.6665	8.61283		XLOC_011307	2810429I04Rik	NA	0	3.18111		XLOC_011848	Tgfbi	ENSMUSG00000035493	11.78	76.8563
XLOC_017076	Nfe2	NA	0.173733	1.18044		XLOC_011314	Calm4	ENSMUSG00000033765	0	0.682651		XLOC_011875	Gm5084	NA	2.19222	0
XLOC_017082	Gtsf1	ENSMUSG00000022487	0	1.30444		XLOC_011317	Akr1c14	NA	1.3277	44.9903		XLOC_012005	Slc12a7	ENSMUSG00000017756	6.89277	36.0972
XLOC_017220	Cebpd	NA	84.8407	30.1219		XLOC_011335	Idi1	ENSMUSG00000058258	3.77741	60.6956		XLOC_012154	Gm807	NA	0	1.17383
XLOC_017343	Kng1	NA	11.1178	28.4423		XLOC_011361	Prl2c5	NA	0	0.620848		XLOC_012222	Gm15327	NA	1.08948	0
XLOC_017439	Muc4	NA	4.06661	0.34768		XLOC_011438	Hist1h2bp	ENSMUSG00000069308	5.61088	0		XLOC_012315	Akr1c18	NA	33.1059	120.363
XLOC_017453	Slc12a8	NA	2.31791	9.94552		XLOC_011494	Gm11331	NA	0	13.1591		XLOC_012508	Btn1a1	NA	0	0.649219
XLOC_017478	2010005H15Rik	ENSMUSG00000095620	0	0.620359		XLOC_011511	Hist1h3d	NA	0	1.52999		XLOC_012566	Prl8a9	NA	0	43.2265
XLOC_017516	Igsf11	NA	10.8292	27.6348		XLOC_011549	Prl3d1	NA	0	1.02933		XLOC_012568	Prl7b1	ENSMUSG00000021347	0	0.679887
XLOC_017545	Cfap44	NA	0.0157985	4.02007		XLOC_011552	Prl3c1	ENSMUSG00000017922	0	193.291		XLOC_012570	Prl7a2	NA	0	3.66147
XLOC_017736	Mrap	NA	3.17249	73.284		XLOC_011559	Prl6a1	NA	0	36.5957		XLOC_012609	Gm11377	NA	0	0.937029
XLOC_017794	Igsf5,Pcp4	NA	179.677	63.0352		XLOC_011561	Prl8a2	NA	0	1232.42		XLOC_012612	Gmds	ENSMUSG00000038372	44.1818	8.83859
XLOC_017807	Bace2	ENSMUSG00000040605	7.09511	31.0998		XLOC_011607	Serpinb6b	NA	10.7005	148.013		XLOC_012631	Serpinb6c	NA	0	1.2351
XLOC_017879	Emp2	NA	23.4644	6.71069		XLOC_011609	Serpinb9b	NA	0.329854	100.762		XLOC_012645	Eci3	ENSMUSG00000021416	0	0.606696
XLOC_017912	Pla2g10	ENSMUSG00000022683	6.71153	0.83239		XLOC_011612	Serpinb9e	NA	0	4.9623		XLOC_012651	Nrn1	ENSMUSG00000039114	3.58438	41.5169
XLOC_017946	Spag6	NA	0.040805	3.10002		XLOC_011613	Serpinb9f	NA	0	0.535295		XLOC_012735	Susd3	ENSMUSG00000021384	0	17.6051
XLOC_017967	Lrrc74b	NA	0.221007	3.58845		XLOC_011615	Serpinb9g	NA	0	0.685697		XLOC_012760	Shc3	ENSMUSG00000021448	0	0.61783
XLOC_018056	Etv5	ENSMUSG00000013089	13.7824	4.70398		XLOC_011647	Ly86	ENSMUSG00000021423	139.416	4.69423		XLOC_012763	Sema4d	NA	8.06853	1.87366
XLOC_018194	Slc15a2	ENSMUSG00000022899	39.3773	12.4086		XLOC_011676	Sycp2l	NA	0	0.767993		XLOC_012774	Ror2	NA	11.2133	2.15761
XLOC_018206	Nr1i2	NA	0	0.863424		XLOC_011806	Eif4e1b	NA	0	5.83465		XLOC_012800	Hk3	NA	3.28884	0.33482
XLOC_018288	Zpld1	ENSMUSG00000064310	0	6.50698		XLOC_011836	Slc25a48	NA	124.288	2.81136		XLOC_012821	Pitx1	NA	0	0.5414
XLOC_018303	Tmem45a	NA	9.93654	40.1434		XLOC_011853	Gm27271	NA	0	4.35862		XLOC_012827	Cxcl14	ENSMUSG00000021508	21.1768	415.732
XLOC_018319	Gm813	ENSMUSG00000075002	0	4.74703		XLOC_011964	9430065F17Rik	NA	2.3289	0		XLOC_012857	Slc28a3	ENSMUSG00000021553	22.4629	1.92847
XLOC_018320	E330017A01Rik	NA	0	8.5208		XLOC_012035	A830082K12Rik	NA	0	1.96644		XLOC_012859	Golm1	ENSMUSG00000021556	80.3395	11.3413
XLOC_018536	Dscam	NA	1.24627	0.0788246		XLOC_012151	1700024P04Rik	NA	194.941	0		XLOC_012919	Fbp1	ENSMUSG00000069805	0	0.744805
XLOC_018537	Mx1	NA	0.991205	0.101043		XLOC_012154	Gm807	NA	0	1.12854		XLOC_012941	Nlrp4f	ENSMUSG00000032999	0	1.71049
XLOC_018541	Tmprss2	ENSMUSG00000000385	40.5491	6.42562		XLOC_012280	Hmgcs1	ENSMUSG00000093930	2.76592	138.004		XLOC_013068	Adgrv1	ENSMUSG00000069170	0.136196	5.93312
XLOC_018608	Rps6ka2	ENSMUSG00000023809	4.94271	13.6928		XLOC_012315	Akr1c18	NA	0	115.703		XLOC_013097	Atp6ap1l	ENSMUSG00000078958	0	0.791457
XLOC_018789	Gm10226	ENSMUSG00000067929	0	4.00371		XLOC_012431	Hist1h2bl	ENSMUSG00000094338	8.48982	0		XLOC_013112	Thbs4	ENSMUSG00000021702	2.85202	20.2308
XLOC_018827	Dcpp1,Dcpp2	ENSMUSG00000096445;ENSMUSG00000096278	0	9.63046		XLOC_012455	Prss16	NA	0	0.519795		XLOC_013119	Bhmt	NA	0	56.6933
XLOC_018868	Prss28	NA	2470.13	609.251		XLOC_012508	Btn1a1	NA	0	0.624168		XLOC_013134	F2rl1	ENSMUSG00000021678	11.9986	0.956382
XLOC_018869	Prss29	ENSMUSG00000034039	4804.58	643.026		XLOC_012512	Hist1h2bh	NA	0	0.531432		XLOC_013136	F2r	ENSMUSG00000048376	5.29988	58.6833
XLOC_018889	Pigq	NA	0.495041	0		XLOC_012516	Hist1h2bf	NA	4.30065	0		XLOC_013181	Naip2	NA	2.3248	0.215269
XLOC_018926	Gm15420	NA	0.92181	0		XLOC_012566	Prl8a9	NA	0	41.545		XLOC_013182	Naip5	NA	6.60524	0.913614
XLOC_018976	Umodl1	ENSMUSG00000054134	0	1.85231		XLOC_012570	Prl7a2	NA	0	3.51964		XLOC_013189	Naip6	ENSMUSG00000078942	2.56608	0.19051
XLOC_019088	Tnxb	NA	25.8784	8.06607		XLOC_012609	Gm11377	NA	0	0.900861		XLOC_013287	Fst	ENSMUSG00000021765	4.09436	105.35
XLOC_019125	H2-D1	NA	175.069	71.8011		XLOC_012644	Fam217a	ENSMUSG00000021414	0	0.75144		XLOC_013364	Gm26655	NA	0	3.23594
XLOC_019137	H2-Q4	NA	42.5849	9.87172		XLOC_012645	Eci3	ENSMUSG00000021416	0	0.583234		XLOC_013369	Gm3252	NA	0.9555	0
XLOC_019139	H2-Q6	ENSMUSG00000073409	38.468	7.03741		XLOC_012651	Nrn1	ENSMUSG00000039114	2.84327	39.9052		XLOC_013436	Sntn	NA	0	6.0708
XLOC_019141	H2-Q7	NA	33.5944	7.99564		XLOC_012735	Susd3	ENSMUSG00000021384	0.517437	16.9282		XLOC_013602	Arhgap22	ENSMUSG00000063506	0	3.11873
XLOC_019143	H2-Q10	ENSMUSG00000067235	1.15898	5.95492		XLOC_012763	Sema4d	NA	13.2966	1.80118		XLOC_013621	Grid1	ENSMUSG00000041078	0	0.754535
XLOC_019146	Pou5f1	NA	0	2.00293		XLOC_012765	Diras2	ENSMUSG00000047842	0	2.66501		XLOC_013646	Gm2832	NA	0	1.14975
XLOC_019150	2300002M23Rik	ENSMUSG00000039269	0	1.47824		XLOC_012800	Hk3	NA	28.0954	0.321944		XLOC_013648	Gm5798	NA	0	1.56822
XLOC_019157	Ier3	NA	126.467	42.2167		XLOC_012919	Fbp1	ENSMUSG00000069805	0	0.715881		XLOC_013672	Gm8104	NA	0	1.41683
XLOC_019296	Pla2g7	NA	37.8577	9.54136		XLOC_012932	Cdc14b	ENSMUSG00000033102	0.45291	6.86229		XLOC_013725	Gm1821	NA	68.1335	5.34094
XLOC_019338	Ptk7	ENSMUSG00000023972	0.645436	12.5798		XLOC_012941	Nlrp4f	ENSMUSG00000032999	0	1.64446		XLOC_013781	Rnase10	ENSMUSG00000021872	1.10861	0
XLOC_019481	Lama1	ENSMUSG00000032796	3.53793	13.2174		XLOC_012960	Gm28557,Rslcan18,Zfp708	NA	0.259681	3.06612		XLOC_013798	Ear6	ENSMUSG00000062148	0	2.6965
XLOC_019505	Fam179a	NA	0.0227699	2.61071		XLOC_013062	Nr2f1	NA	0	6.63215		XLOC_014054	Cpne6	NA	0.0133678	2.43605
XLOC_019514	Ehd3	NA	4.23609	15.3388		XLOC_013068	Adgrv1	ENSMUSG00000069170	0.277601	5.70331		XLOC_014094	Gm4491	NA	2.06003	0
XLOC_019522	Ltbp1	ENSMUSG00000001870	8.12262	28.3669		XLOC_013097	Atp6ap1l	ENSMUSG00000078958	0	0.760828		XLOC_014198	Stc1	ENSMUSG00000014813	3.74513	20.589
XLOC_019532	Vit	ENSMUSG00000024076	12.9024	3.21023		XLOC_013112	Thbs4	ENSMUSG00000021702	1.55897	19.451		XLOC_014266	Epsti1	NA	28.3484	1.10439
XLOC_019542	Rmdn2	ENSMUSG00000036368	3.61194	15.0461		XLOC_013119	Bhmt	NA	0.635694	54.5048		XLOC_014313	Klf5	ENSMUSG00000005148	10.5116	40.8358
XLOC_019577	Gm24240	NA	2.10641	0		XLOC_013143	Hmgcr	NA	4.82679	45.7162		XLOC_014329	Irg1	NA	0	2.57919
XLOC_019592	Plekhh2	ENSMUSG00000040852	7.36495	2.44325		XLOC_013192	Naip3	NA	0.917043	0		XLOC_014363	Gpc6	NA	0.786293	8.9432
XLOC_019624	Epcam	ENSMUSG00000045394	76.8634	21.7534		XLOC_013228	Rgs7bp	ENSMUSG00000021719	0	0.474784		XLOC_014406	Gm28932	NA	0	1.16708
XLOC_019785	Thbs2	ENSMUSG00000023885	0.355116	2.82863		XLOC_013261	Gm9025	NA	0	0.541614		XLOC_014507	Fam107a	ENSMUSG00000021750	0.246097	2.4551
XLOC_019889	Tnfrsf12a	ENSMUSG00000023905	35.0669	94.6933		XLOC_013287	Fst	ENSMUSG00000021765	5.69297	101.275		XLOC_014508	Oit1	NA	56.4208	8.35198
XLOC_019904	Prss22	ENSMUSG00000045027	0	1.0601		XLOC_013436	Sntn	NA	0	5.83601		XLOC_014510	Gm9800	NA	3.22637	36.9631
XLOC_019932	Syngr3	NA	0	0.62124		XLOC_013507	E330034G19Rik	NA	0	3.66727		XLOC_014556	Cfap70	NA	0.0705102	1.27572
XLOC_019966	Gm26694	NA	0	1.68342		XLOC_013527	4933413J09Rik	NA	0	0.792368		XLOC_014614	Plac9b	NA	0	1.36121
XLOC_019989	Gm20468	NA	0	1.68622		XLOC_013535	Dnah12	NA	0	1.31196		XLOC_014619	Slmap	NA	106.8	24.9048
XLOC_020023	Fkbp5	NA	18.0977	115.763		XLOC_013558	Mustn1	ENSMUSG00000042485	46.7726	2.7655		XLOC_014671	1700024G13Rik	NA	0	7.02156
XLOC_020039	Cpne5	NA	3.36548	0.0993062		XLOC_013583	Ncoa4	ENSMUSG00000056234	0.662622	22.5553		XLOC_014672	Chat	ENSMUSG00000021919	0	1.79111
XLOC_020123	H2-K1	NA	88.2302	16.1046		XLOC_013646	Gm2832	NA	0	1.10526		XLOC_014694	Ldb3	ENSMUSG00000021798	6.34249	1.04259
XLOC_020186	Gm23442	NA	0	10.7485		XLOC_013704	Gm16439	NA	0	3.29297		XLOC_014712	2610528A11Rik	ENSMUSG00000096001	0	10.7737
XLOC_020357	Slc25a27	ENSMUSG00000023912	10.3206	2.91408		XLOC_013719	Styx	ENSMUSG00000053205	0	2.92005		XLOC_014728	Fam213a	NA	1010.14	57.1557
XLOC_020390	Gm26904	NA	1.48578	0.330789		XLOC_013798	Ear6	ENSMUSG00000062148	0	2.59236		XLOC_014729	Dydc2	ENSMUSG00000021791	0	1.06743
XLOC_020392	Gm26904	NA	4.06418	0		XLOC_014061	Psme1	NA	715.572	106.882		XLOC_014731	Sftpd	ENSMUSG00000021795	123.14	17.1676
XLOC_020394	Gm26904	NA	6.36114	0.904995		XLOC_014171	Scara5	NA	23.7679	2.47401		XLOC_014746	Gm3676	ENSMUSG00000079269	0	1.22191
XLOC_020405	Gm26904	NA	0.234639	0.752314		XLOC_014185	Pnma2	ENSMUSG00000046204	0	0.606188		XLOC_014919	Rnase1	ENSMUSG00000035896	0	5.65622
XLOC_020534	Rpl7a-ps5	NA	0.509067	0		XLOC_014198	Stc1	ENSMUSG00000014813	1.274	19.7906		XLOC_014920	Ang2	ENSMUSG00000047894	0	1.91264
XLOC_020563	Txndc2	ENSMUSG00000050612	0	3.58996		XLOC_014212	Egr3	ENSMUSG00000033730	0	0.606041		XLOC_014921	Rnase2a	ENSMUSG00000047222	0	6.88863
XLOC_020579	Lrrc30	NA	0	0.879165		XLOC_014237	Lcp1	NA	42.7523	7.43043		XLOC_015034	Ctsg	ENSMUSG00000040314	0	1.59545
XLOC_020580	Arhgap28	NA	3.91496	11.3186		XLOC_014248	Snora31	NA	0	31.8956		XLOC_015037	Gzmg	ENSMUSG00000040284	0	27.1014
XLOC_020597	Gm4707	NA	0.174443	0.793189		XLOC_014262	1700108F19Rik	NA	0	0.73337		XLOC_015040	Gzmc	ENSMUSG00000079186	1.43616	39.4647
XLOC_020733	1700011E24Rik	NA	0.548095	0		XLOC_014462	Gm3468,Gm8206	NA	0	0.521222		XLOC_015041	Gzmb	ENSMUSG00000015437	1.17359	24.9508
XLOC_020745	Fshr	ENSMUSG00000032937	0	11.9996		XLOC_014483	Gm6356	NA	0.81185	0		XLOC_015059	Gjb2	NA	69.519	8.29965
XLOC_020747	Nrxn1	ENSMUSG00000024109	0	1.15178		XLOC_014484	Gm10406	NA	0	0.497969		XLOC_015061	Gjb6	NA	8.40514	0
XLOC_020814	Greb1l	ENSMUSG00000042942	1.22271	7.96671		XLOC_014506	Acox2	ENSMUSG00000021751	0	1.36605		XLOC_015101	Ebpl	ENSMUSG00000021928	7.62195	36.914
XLOC_020826	Gata6	NA	2.79999	14.071		XLOC_014509	4930452B06Rik	ENSMUSG00000021747	0	0.493084		XLOC_015132	Gata4	NA	0.126985	24.7713
XLOC_020835	Lama3	NA	18.3567	4.23595		XLOC_014556	Cfap70	NA	0	1.22532		XLOC_015161	Ephx2	ENSMUSG00000022040	3.63544	299.5
XLOC_020982	Gm23882	NA	1.76889	0		XLOC_014600	Gm26660	NA	0	0.923992		XLOC_015204	Rhobtb2	ENSMUSG00000022075	9.99794	2.48196
XLOC_020985	Psd2	ENSMUSG00000024347	2.55431	0.402462		XLOC_014604	Zcchc24	NA	128.907	20.3254		XLOC_015217	Sftpc	ENSMUSG00000022097	0	1.94619
XLOC_021123	Zfp474	NA	0	2.37931		XLOC_014614	Plac9b	NA	0	1.30898		XLOC_015284	Fam216b	NA	0	2.60342
XLOC_021131	Prdm6	ENSMUSG00000069378	0	1.71609		XLOC_014636	Il17rb	ENSMUSG00000015966	85.003	2.92407		XLOC_015287	Tnfsf11	ENSMUSG00000022015	0	0.731106
XLOC_021231	Apcdd1	ENSMUSG00000071847	52.1371	23.4105		XLOC_014671	1700024G13Rik	NA	0	6.74899		XLOC_015292	Zfp957	ENSMUSG00000071262	0	0.47885
XLOC_021297	Mex3c	ENSMUSG00000037253	13.0218	35.4489		XLOC_014740	Gm3486	ENSMUSG00000090505	0	0.83057		XLOC_015302	Lect1	ENSMUSG00000022025	0	30.9252
XLOC_021303	Mro	NA	0	10.0464		XLOC_014746	Gm3676	ENSMUSG00000079269	0	1.17435		XLOC_015366	Ednrb	ENSMUSG00000022122	4.6104	21.5348
XLOC_021334	St8sia5	ENSMUSG00000025425	0	0.596812		XLOC_014840	Gm22637	NA	0	2.77916		XLOC_015495	Agxt2,Gm21973,Prlr	ENSMUSG00000089678;ENSMUSG00000005268	2.11452	19.4971
XLOC_021357	Mbp	NA	1.57455	6.29172		XLOC_014905	Ccnb1ip1	ENSMUSG00000071470	0	4.54136		XLOC_015541	Ank	ENSMUSG00000022265	50.4533	9.75643
XLOC_021358	Gm10524	NA	176.955	25.98		XLOC_014919	Rnase1	ENSMUSG00000035896	0	5.43508		XLOC_015593	Grhl2	NA	10.8914	1.44763
XLOC_021434	Mkx	ENSMUSG00000061013	0.253449	3.31548		XLOC_014920	Ang2	ENSMUSG00000047894	0	1.83858		XLOC_015656	Mal2	ENSMUSG00000024479	98.3878	1.62211
XLOC_021435	Armc4	NA	0	1.21247		XLOC_014921	Rnase2a	ENSMUSG00000047222	0	6.62229		XLOC_015661	Col14a1	NA	2.38725	55.582
XLOC_021488	Kctd1	NA	20.5454	7.50785		XLOC_014992	Ppp1r3e	NA	0	0.839029		XLOC_015742	Psca	NA	6.86298	58.2098
XLOC_021510	Nol4	ENSMUSG00000041923	0.535078	0		XLOC_015031	Mcpt4	ENSMUSG00000061068	8.75598	0		XLOC_015753	Gm5960	NA	0	1.97657
XLOC_021684	Spink3	ENSMUSG00000024503	3223.98	588.741		XLOC_015034	Ctsg	ENSMUSG00000040314	0	1.53372		XLOC_015765	2810039B14Rik	NA	0.409748	6.43311
XLOC_021736	Zfp608	ENSMUSG00000052713	5.39703	1.29137		XLOC_015132	Gata4	NA	0	23.814		XLOC_015777	Mapk15	NA	0.350228	10.9803
XLOC_021763	Synpo	ENSMUSG00000043079	8.71584	41.7099		XLOC_015161	Ephx2	ENSMUSG00000022040	3.33253	287.92		XLOC_015819	Apol6	ENSMUSG00000033576	4.10163	22.8776
XLOC_021772	Rps2-ps10	NA	84.9335	354.68		XLOC_015217	Sftpc	ENSMUSG00000022097	0	1.87074		XLOC_015923	Cyp2d12	ENSMUSG00000096852	0	1.59932
XLOC_021778	Arhgef37	ENSMUSG00000045094	4.39853	0.585746		XLOC_015284	Fam216b	NA	0	2.50225		XLOC_015946	Parvb	NA	1.44502	19.8184
XLOC_021839	Dynap	NA	0	4.13975		XLOC_015287	Tnfsf11	ENSMUSG00000022015	0	0.702799		XLOC_015951	Prr5	NA	5.82293	28.9108
XLOC_021861	Lipg	ENSMUSG00000053846	5.06808	33.7704		XLOC_015292	Zfp957	ENSMUSG00000071262	0	0.460391		XLOC_015959	Ribc2	ENSMUSG00000022431	0	1.56302
XLOC_021885	Siglec15	ENSMUSG00000091055	0	1.19852		XLOC_015302	Lect1	ENSMUSG00000022025	0	29.7178		XLOC_016018	Miox	NA	0	5.49728
XLOC_021887	Slc14a1	ENSMUSG00000059336	1.84736	8.57427		XLOC_015449	C6	NA	4.59463	0.177557		XLOC_016036	Cntn1	ENSMUSG00000055022	5.2279	0.295034
XLOC_021933	Cndp2	ENSMUSG00000024644	126.95	50.1577		XLOC_015469	C9	NA	1.26628	0		XLOC_016086	Wnt1	NA	0	1.09789
XLOC_022143	Syt7	ENSMUSG00000024743	0.950494	4.5244		XLOC_015486	Gm2310	NA	2.60824	0		XLOC_016115	Aqp5	ENSMUSG00000044217	66.4938	18.2776
XLOC_022173	Oosp3	NA	0	2.2482		XLOC_015495	Agxt2,Gm21973,Prlr	ENSMUSG00000089678;ENSMUSG00000005268	0.190474	18.741		XLOC_016133	Mettl7a1	ENSMUSG00000054619	103.157	22.2326
XLOC_022190	Mpeg1	NA	9.44749	3.03163		XLOC_015498	C1qtnf3	NA	33.264	0.430665		XLOC_016177	Krt7	NA	237.999	6.6375
XLOC_022260	Aldh1a1	ENSMUSG00000053279	2.07248	158.604		XLOC_015547	Dnah5	ENSMUSG00000022262	0	0.527559		XLOC_016202	Amhr2	NA	0.454582	17.5846
XLOC_022285	Gm6563	ENSMUSG00000051255	0	0.638332		XLOC_015578	Osr2	ENSMUSG00000022330	163.025	21.8513		XLOC_016206	Gm10337	ENSMUSG00000071586	0	4.80005
XLOC_022342	Papss2	ENSMUSG00000024899	1.83103	7.70506		XLOC_015777	Mapk15	NA	0	10.5524		XLOC_016217	Hoxc11	NA	0	2.50655
XLOC_022363	Ifit3	ENSMUSG00000074896	29.2258	5.37858		XLOC_015826	Apol7e	ENSMUSG00000071716	0	2.98199		XLOC_016362	Rgs22	ENSMUSG00000037627	0.179944	2.77945
XLOC_022364	I830012O16Rik	ENSMUSG00000062488	13.6325	2.09252		XLOC_015829	Apol9b	ENSMUSG00000068246	18.5281	1.24286		XLOC_016424	Rspo2	ENSMUSG00000051920	0	0.958697
XLOC_022392	Cyp26a1	ENSMUSG00000024987	120.383	30.4114		XLOC_015840	Cyth4	ENSMUSG00000018008	38.5279	5.901		XLOC_016482	Fbxo32	ENSMUSG00000022358	23.1433	3.20725
XLOC_022398	Lgi1	NA	0.104834	1.33574		XLOC_015923	Cyp2d12	ENSMUSG00000096852	0	1.53729		XLOC_016520	Lrrc6	ENSMUSG00000022375	0	0.685433
XLOC_022449	Cnnm1	ENSMUSG00000025189	0	1.68617		XLOC_015947	Parvg	NA	12.361	1.46119		XLOC_016543	Col22a1	ENSMUSG00000079022	1.99144	17.4093
XLOC_022561	Vwa2	ENSMUSG00000025082	12.2181	2.94773		XLOC_015959	Ribc2	ENSMUSG00000022431	0	1.50232		XLOC_016575	Gml	ENSMUSG00000068349	0	0.732555
XLOC_022578	Slc18a2	ENSMUSG00000025094	1.29143	23.3706		XLOC_016018	Miox	NA	0	5.28402		XLOC_016576	Cyp11b1	NA	0	1.92674
XLOC_022618	Aldh3b1	ENSMUSG00000024885	2.34447	20.1613		XLOC_016052	Tmem117	ENSMUSG00000063296	0	0.935612		XLOC_016589	Ly6c1	NA	9.47381	142.543
XLOC_022799	Myrf	ENSMUSG00000036098	0.197168	1.22299		XLOC_016086	Wnt1	NA	0	1.05532		XLOC_016594	Gm10238	NA	14.9435	0
XLOC_022803	Ppp1r32	ENSMUSG00000035179	0.1773	4.25605		XLOC_016123	Gm17057	NA	1.35646	0		XLOC_016672	Apol7a	NA	11.6849	0.434661
XLOC_022817	Ms4a10	ENSMUSG00000024731	0	1.65976		XLOC_016142	Higd1c,Methig1,Mettl7a2	NA	0	0.65412		XLOC_016728	Kcnj4	ENSMUSG00000044216	0	0.591756
XLOC_022844	Oosp1	NA	0	10.2084		XLOC_016172	6030408B16Rik	NA	51.1795	3.55436		XLOC_016820	Efcab6	ENSMUSG00000022441	0.0174323	0.768321
XLOC_022950	Mamdc2	ENSMUSG00000033207	26.9127	5.69449		XLOC_016179	1700011A15Rik	ENSMUSG00000063971	0.951705	0		XLOC_016824	1810041L15Rik	NA	2.27337	0.199377
XLOC_022954	Fam189a2	ENSMUSG00000071604	42.8193	8.51401		XLOC_016193	Igfbp6	NA	632.676	71.5538		XLOC_016826	Phf21b	ENSMUSG00000016624	55.4958	2.06481
XLOC_022962	Pgm5	NA	31.3655	9.9528		XLOC_016206	Gm10337	ENSMUSG00000071586	0	4.61159		XLOC_016911	Slc38a1	ENSMUSG00000023169	35.7858	8.14307
XLOC_022999	Rln1	NA	0	1.08241		XLOC_016232	Nckap1l	ENSMUSG00000022488	12.3408	1.31992		XLOC_016935	Lalba	ENSMUSG00000022991	0	0.677671
XLOC_023045	Pank1	ENSMUSG00000033610	7.43651	30.2407		XLOC_016264	Slc1a3	NA	0.21355	3.04428		XLOC_016947	Wnt10b	ENSMUSG00000022996	0	33.9281
XLOC_023144	Cnnm1	ENSMUSG00000025189	0	9.88308		XLOC_016377	Gm10384	ENSMUSG00000072618	0	0.79718		XLOC_016960	Gm25999	NA	11.2255	0
XLOC_023201	Cyp17a1	NA	0	40.1465		XLOC_016424	Rspo2	ENSMUSG00000051920	0	0.921607		XLOC_017026	Krt84	ENSMUSG00000044294	15.282	2.73111
XLOC_023249	Gpam	NA	19.031	46.6696		XLOC_016562	Gm3244	NA	0	4.81559		XLOC_017032	Krt6b	ENSMUSG00000023041	0.779396	0
XLOC_023267	Gfra1	NA	0.522702	0.0364418		XLOC_016565	Mroh4	ENSMUSG00000022603	0	0.647254		XLOC_017046	Krt8	ENSMUSG00000049382	303.8	27.4294
XLOC_023355	Gm13391	NA	0	1.69589		XLOC_016575	Gml	ENSMUSG00000068349	0	0.70444		XLOC_017082	Gtsf1	ENSMUSG00000022487	0	1.20316
XLOC_023626	Il1f10	NA	0	0.738517		XLOC_016576	Cyp11b1	NA	0	1.85221		XLOC_017118	Smim22	NA	119.673	13.3748
XLOC_023639	Pnpla7	NA	33.4196	9.61848		XLOC_016594	Gm10238	NA	5.79333	0		XLOC_017135	Abat	NA	3.93902	41.8788
XLOC_023680	Kcnt1	NA	0.378636	3.91015		XLOC_016649	Slc39a4	ENSMUSG00000063354	1257.21	50.7142		XLOC_017288	B3gnt5	NA	3.68438	0.364891
XLOC_023731	Olfm1	NA	178.733	40.5649		XLOC_016674	Apol9a	ENSMUSG00000057346	23.5362	1.17666		XLOC_017312	Chrd	NA	4.38579	19.8599
XLOC_023825	Aif1l	NA	6.99968	20.4472		XLOC_016700	Rac2	ENSMUSG00000033220	83.4179	3.73478		XLOC_017343	Kng1	NA	0.0569078	26.2373
XLOC_024027	Fmnl2	NA	6.71842	19.8282		XLOC_016728	Kcnj4	ENSMUSG00000044216	0	0.56886		XLOC_017353	Rtp4	ENSMUSG00000033355	48.9397	9.19903
XLOC_024111	4932414N04Rik	NA	1.57646	0		XLOC_016776	Shisa8	ENSMUSG00000096883	0	2.36648		XLOC_017439	Muc4	NA	92.979	0.320889
XLOC_024205	2600014E21Rik	NA	6.67154	0.389949		XLOC_016792	Cyp2d26	ENSMUSG00000022445	4.11889	0		XLOC_017453	Slc12a8	NA	0.368104	9.17716
XLOC_024503	Pamr1	NA	34.6834	6.3125		XLOC_016820	Efcab6	ENSMUSG00000022441	0	0.738384		XLOC_017454	Heg1	NA	8.48897	31.902
XLOC_024559	Mpped2	ENSMUSG00000016386	0.0999323	1.46015		XLOC_016867	Odf3b	ENSMUSG00000047394	0	7.57455		XLOC_017460	Mylk	NA	653.257	93.7924
XLOC_024666	Spint1	ENSMUSG00000027315	45.2887	13.5283		XLOC_016879	Kif21a	ENSMUSG00000022629	0.0408837	4.94735		XLOC_017463	Adcy5	ENSMUSG00000022840	20.2832	5.28109
XLOC_024686	Sptbn5	NA	0	1.58566		XLOC_016947	Wnt10b	ENSMUSG00000022996	0	32.624		XLOC_017478	2010005H15Rik	ENSMUSG00000095620	0	0.572403
XLOC_024939	Cfap61	ENSMUSG00000037143	0.0629393	1.5902		XLOC_017022	5430421N21Rik	NA	0	7.64014		XLOC_017516	Igsf11	NA	1.08146	25.4941
XLOC_024963	Cst12	NA	0	63.6521		XLOC_017032	Krt6b	ENSMUSG00000023041	0.769132	0		XLOC_017545	Cfap44	NA	0	3.70964
XLOC_024971	Syndig1	NA	2.97766	0.470897		XLOC_017033	Krt6a	ENSMUSG00000058354	5.06214	0		XLOC_017697	Jam2	ENSMUSG00000053062	4.0322	17.6135
XLOC_025007	Angpt4	NA	3.48601	32.1654		XLOC_017045	Krt78	ENSMUSG00000050463	0.756829	0		XLOC_017736	Mrap	NA	0	67.6298
XLOC_025069	Bpifb4	NA	0	10.7548		XLOC_017046	Krt8	ENSMUSG00000049382	224.953	26.3621		XLOC_017737	Eva1c	NA	7.74412	61.6041
XLOC_025143	Snhg11	NA	0.26147	3.31274		XLOC_017078	Zfp385a	ENSMUSG00000000552	39.2388	6.53744		XLOC_017748	A930006K02Rik	NA	0	0.822142
XLOC_025193	Tox2	NA	2.67552	16.1837		XLOC_017082	Gtsf1	ENSMUSG00000022487	0	1.15645		XLOC_017755	Gm15976	NA	0.847971	0.186688
XLOC_025222	Wfdc2	NA	618.506	143.346		XLOC_017085	Glycam1	ENSMUSG00000022491	4.90639	0		XLOC_017792	Sh3bgr	ENSMUSG00000040666	51.3973	9.98564
XLOC_025244	Cd40	NA	1.81013	0.189227		XLOC_017135	Abat	NA	3.76317	40.2529		XLOC_017794	Igsf5,Pcp4	NA	840.493	58.1825
XLOC_025334	Pck1	ENSMUSG00000027513	42.2856	5.59279		XLOC_017220	Cebpd	NA	163.418	26.7197		XLOC_017796	Itgb2l	NA	0	1.45765
XLOC_025374	Gm2026	NA	0	1.27324		XLOC_017258	AA914427	NA	0	1.01323		XLOC_017799	Itgb2l	NA	0.592538	0.140084
XLOC_025387	Gm14402	NA	0	1.00702		XLOC_017343	Kng1	NA	0.404278	25.2206		XLOC_017862	Gm23689	NA	0	2.10246
XLOC_025520	Celf2	NA	9.27131	3.49757		XLOC_017353	Rtp4	ENSMUSG00000033355	63.1721	8.84438		XLOC_017865	Tmem114	NA	0	0.764436
XLOC_025533	9230102O04Rik,Gata3	NA	6.63651	22.4704		XLOC_017439	Muc4	NA	15.3888	0.308434		XLOC_017879	Emp2	NA	47.9574	6.19305
XLOC_025664	Tbpl2	NA	0	0.497035		XLOC_017453	Slc12a8	NA	0.697518	8.82129		XLOC_017946	Spag6	NA	0	2.8592
XLOC_025666	Pax8	ENSMUSG00000026976	21.7142	5.99012		XLOC_017488	Ildr1	NA	16.5924	1.19476		XLOC_017967	Lrrc74b	NA	0.143705	3.3105
XLOC_025792	Gm13420	NA	0.869032	0		XLOC_017493	Hcls1	NA	57.7691	6.72138		XLOC_018061	Kng2	NA	1.60824	21.919
XLOC_025821	Ptges	ENSMUSG00000050737	12.8579	55.8462		XLOC_017499	Lrrc58	ENSMUSG00000034158	1.24521	12.9881		XLOC_018067	Masp1	ENSMUSG00000022887	0.148819	3.80506
XLOC_025894	Ggta1	NA	25.6342	9.02218		XLOC_017516	Igsf11	NA	2.3535	24.5123		XLOC_018173	Parp14	NA	38.7955	7.08563
XLOC_026058	Grb14	NA	4.71662	68.1291		XLOC_017529	BC002163	NA	68.715	0		XLOC_018284	Alcam	NA	49.7337	10.1048
XLOC_026086	Lrp2	NA	1.57777	0.155758		XLOC_017545	Cfap44	NA	0	3.56519		XLOC_018288	Zpld1	ENSMUSG00000064310	0	6.00138
XLOC_026181	Ccdc141	NA	31.3197	5.28983		XLOC_017546	Boc	NA	0	3.1035		XLOC_018293	Nxpe3	ENSMUSG00000075033	0.262175	3.29824
XLOC_026186	Zfp385b	NA	0.176242	4.86265		XLOC_017575	Retnlg	ENSMUSG00000022651	13.9882	0		XLOC_018302	Adgrg7	ENSMUSG00000022755	37.1673	0.775995
XLOC_026426	Olfr1250	ENSMUSG00000075078	0	1.79224		XLOC_017576	C330027C09Rik	ENSMUSG00000033031	1.32044	10.9715		XLOC_018319	Gm813	ENSMUSG00000075002	0	4.37921
XLOC_026427	Olfr1251	ENSMUSG00000100323	0	2.09283		XLOC_017611	Cmss1	ENSMUSG00000022748	16.3302	0		XLOC_018320	E330017A01Rik	NA	0	7.85892
XLOC_026497	Accsl	NA	0	3.16242		XLOC_017694	Gm26667,Mir155	NA	0	0.975994		XLOC_018499	Runx1	NA	2.51307	18.5828
XLOC_026505	E530001K10Rik,Mir670	NA	0.774465	0		XLOC_017735	Gm17518	NA	0	0.474768		XLOC_018537	Mx1	NA	10.002	0.0932153
XLOC_026545	BC016548	NA	0	1.23178		XLOC_017736	Mrap	NA	1.92177	65.0166		XLOC_018541	Tmprss2	ENSMUSG00000000385	21.9856	5.92752
XLOC_026559	D430041D05Rik	NA	0.993459	0.0782849		XLOC_017748	A930006K02Rik	NA	0	0.790299		XLOC_018588	3300005D01Rik	NA	3.30977	0
XLOC_026590	BB218582	NA	0	1.63261		XLOC_017771	Cbr3	NA	52.8246	5.81489		XLOC_018827	Dcpp1,Dcpp2	ENSMUSG00000096445;ENSMUSG00000096278	0	8.88466
XLOC_026611	Bbox1	NA	0	0.762979		XLOC_017791	Wrb	ENSMUSG00000023147	1.40086	18.3129		XLOC_018832	Prss27	NA	0.921128	0
XLOC_026657	Grem1	NA	0.190487	6.78232		XLOC_017794	Igsf5,Pcp4	NA	816.072	55.9005		XLOC_018868	Prss28	NA	123.104	562.17
XLOC_026695	Bmf	NA	12.5628	4.71704		XLOC_017796	Itgb2l	NA	0	1.40187		XLOC_018887	Gm10012	NA	2.22652	0.250681
XLOC_026752	Gm14001	NA	0.983468	0		XLOC_017806	Itgb2l	NA	0.941269	0.100037		XLOC_018946	Mapk13	NA	58.5068	3.69094
XLOC_026758	Frmd5	ENSMUSG00000027238	0.0912994	11.1508		XLOC_017809	Mx2	ENSMUSG00000023341	27.8452	2.29219		XLOC_018956	Rab44	NA	2.61847	0.0303759
XLOC_026814	Mal	ENSMUSG00000027375	11.2969	2.98585		XLOC_017862	Gm23689	NA	0	2.02099		XLOC_018961	Pi16	ENSMUSG00000024011	4.19293	24.2005
XLOC_026887	5330413P13Rik,Gm14282	NA	0	0.596198		XLOC_017865	Tmem114	NA	0	0.73507		XLOC_018976	Umodl1	ENSMUSG00000054134	0	1.70856
XLOC_026888	Erv3	ENSMUSG00000037482	0.695295	15.0612		XLOC_017879	Emp2	NA	36.9485	5.95288		XLOC_018984	Slc37a1	ENSMUSG00000024036	20.9119	1.90993
XLOC_026945	Banf2os	NA	0	0.553677		XLOC_017885	Socs1	NA	244.592	8.02518		XLOC_019016	Cyp4f15	NA	0	2.08944
XLOC_026996	Cd93	ENSMUSG00000027435	46.8377	20.8251		XLOC_017912	Pla2g10	ENSMUSG00000022683	75.1238	0.73835		XLOC_019063	H2-DMb1,H2-DMb2	ENSMUSG00000079547	14.5163	1.73724
XLOC_026998	Cst11	NA	0	1.26107		XLOC_017946	Spag6	NA	0	2.7488		XLOC_019065	Tap1	NA	38.5555	7.21406
XLOC_027086	Defb19	NA	0	9.38224		XLOC_017967	Lrrc74b	NA	0.175697	3.18248		XLOC_019094	Slc44a4	ENSMUSG00000007034	65.9263	3.23741
XLOC_027197	Tgm2	NA	118.442	44.4792		XLOC_017979	Gm25777	NA	0	34.8276		XLOC_019157	Ier3	NA	250.953	38.9451
XLOC_027245	Ada	NA	3.60219	15.1375		XLOC_017990	Gm15798	NA	0	0.574589		XLOC_019215	Zfp57	ENSMUSG00000036036	13.673	54.2285
XLOC_027267	Eppin	NA	0	0.656536		XLOC_018087	Atp13a5	NA	0	0.899591		XLOC_019216	Mog	NA	0	0.721831
XLOC_027508	Chrna4	ENSMUSG00000027577	3.20558	0.617935		XLOC_018095	Gm1968	NA	14.136	0		XLOC_019228	Ubd	NA	1.01702	0
XLOC_027509	Kcnq2	NA	0.55413	0.036667		XLOC_018117	Apod	NA	107.613	0.602695		XLOC_019338	Ptk7	ENSMUSG00000023972	0.891503	11.6029
XLOC_027565	Gm5841	NA	0.448697	0		XLOC_018173	Parp14	NA	60.7411	6.81296		XLOC_019351	AI661453	NA	12.8971	1.30253
XLOC_027567	Stmn2	NA	3.71783	21.5194		XLOC_018206	Nr1i2	NA	0	0.765809		XLOC_019374	Unc5cl	NA	126.734	0.844589
XLOC_027884	Mgst2	NA	7.70509	43.1003		XLOC_018209	Pla1a	ENSMUSG00000002847	68.4168	3.1599		XLOC_019390	Gm19585	NA	0	0.668133
XLOC_027924	Postn	NA	205.846	66.6104		XLOC_018233	Qtrtd1	NA	0.566787	9.78156		XLOC_019395	4932415M13Rik,Gm19518	NA	0	2.69178
XLOC_028041	Mlf1	ENSMUSG00000048416	1.53167	9.22012		XLOC_018248	Cd200	NA	879.151	34.6796		XLOC_019442	Pspn	NA	0	4.58325
XLOC_028290	RP23-326D6.5,S100a3,S100a4	NA	54.3134	333.26		XLOC_018263	Gm4737	ENSMUSG00000048087	0	5.94834		XLOC_019447	Cd70	ENSMUSG00000019489	2.60074	0
XLOC_028312	Sprr2b	NA	0	0.857135		XLOC_018288	Zpld1	ENSMUSG00000064310	0	5.76891		XLOC_019481	Lama1	ENSMUSG00000032796	0.483291	12.194
XLOC_028315	Sprr2d	NA	0	0.890337		XLOC_018303	Tmem45a	NA	4.25679	35.5999		XLOC_019514	Ehd3	NA	1.04795	14.1519
XLOC_028351	Tchhl1	ENSMUSG00000027908	0	0.420505		XLOC_018311	Filip1l	NA	7.60317	0		XLOC_019542	Rmdn2	ENSMUSG00000036368	1.7479	13.8812
XLOC_028404	Sema6c	ENSMUSG00000038777	11.3807	2.87699		XLOC_018312	Filip1l	NA	15.0941	0		XLOC_019575	Pkdcc	NA	15.7744	216.201
XLOC_028410	RP23-407B16.2	NA	0.961199	0		XLOC_018319	Gm813	ENSMUSG00000075002	0	4.20868		XLOC_019624	Epcam	ENSMUSG00000045394	274.583	20.0653
XLOC_028456	Hist2h2be	NA	5.10999	18.7293		XLOC_018320	E330017A01Rik	NA	0	7.55293		XLOC_019665	Gm10232	NA	17.6362	0
XLOC_028506	Hmgcs2	NA	34.3933	84.0278		XLOC_018464	Tiam1	ENSMUSG00000002489	0.391152	4.19121		XLOC_019702	Tmem181c-ps	NA	0	1.18743
XLOC_028533	Vtcn1	NA	24.4501	3.08763		XLOC_018537	Mx1	NA	7.89656	0.0896075		XLOC_019904	Prss22	ENSMUSG00000045027	26.2016	0.978251
XLOC_028580	Syt6	NA	4.15985	0.526684		XLOC_018541	Tmprss2	ENSMUSG00000000385	29.4168	5.69866		XLOC_019952	Tpsab1	ENSMUSG00000024173	0	1.0806
XLOC_028611	Kcnd3	NA	3.62284	9.06936		XLOC_018607	Gm1604b	NA	7.77869	0		XLOC_019966	Gm26694	NA	0	1.5539
XLOC_028617	Ovgp1,Wdr77	NA	46.9488	192.453		XLOC_018720	Fpr2,Fpr3	NA	61.7786	0.73015		XLOC_019975	Decr2	NA	2.59209	14.7432
XLOC_028621	Chia1	ENSMUSG00000062778	0	0.823012		XLOC_018827	Dcpp1,Dcpp2	ENSMUSG00000096445;ENSMUSG00000096278	0	8.54176		XLOC_019989	Gm20468	NA	0	1.5561
XLOC_028754	A530020G20Rik	NA	4.45916	46.4562		XLOC_018832	Prss27	NA	7.65272	0		XLOC_020000	Grm4	ENSMUSG00000063239	0	0.744228
XLOC_028758	F3	NA	189.345	41.3808		XLOC_018866	Prss34	ENSMUSG00000056399	0.968155	0		XLOC_020023	Fkbp5	NA	7.69878	106.814
XLOC_028774	Pde5a	NA	13.5897	5.58071		XLOC_018868	Prss28	NA	0	540.365		XLOC_020094	Cyp4f14	ENSMUSG00000024292	0	5.96507
XLOC_028841	Cfi	NA	9.91173	2.34848		XLOC_018869	Prss29	ENSMUSG00000034039	0	570.4		XLOC_020186	Gm23442	NA	0	9.92082
XLOC_028853	RP23-246L14.3	NA	0	0.882364		XLOC_018889	Pigq	NA	6.82817	0		XLOC_020269	Trim15	NA	6.90051	0.218538
XLOC_028908	Slc39a8	NA	26.3291	10.1085		XLOC_018946	Mapk13	NA	57.8812	3.54768		XLOC_020340	Adgrf4	NA	0.602185	22.1225
XLOC_028940	Adh1	NA	24.2325	78.4577		XLOC_018962	Fgd2	NA	21.991	0.838442		XLOC_020360	Runx2	NA	0.84503	15.1297
XLOC_028962	Gbp7	NA	10.5475	2.1566		XLOC_018976	Umodl1	ENSMUSG00000054134	0	1.64222		XLOC_020390	Gm26904	NA	3.69553	0.305366
XLOC_028964	Gbp2b	NA	5.06884	0.473157		XLOC_018989	Cryaa	ENSMUSG00000024041	0	1.2548		XLOC_020392	Gm26904	NA	2.07986	0
XLOC_029000	Col24a1	NA	16.3871	1.2345		XLOC_019007	Gm26549	NA	0	1.2162		XLOC_020394	Gm26904	NA	0	0.835393
XLOC_029020	Uox	NA	0.0182871	1.56331		XLOC_019016	Cyp4f15	NA	0	2.00879		XLOC_020402	Gm26904	NA	0.754863	1.76709
XLOC_029185	Fabp4	ENSMUSG00000062515	4.48591	127.283		XLOC_019027	Zfp955b	ENSMUSG00000096910	0	1.07764		XLOC_020405	Gm26904	NA	0.072775	0.69433
XLOC_029224	Gm5150	NA	0.933862	0		XLOC_019044	Tapbp,Zbtb22	NA	324.86	40.5489		XLOC_020437	Tspo2	NA	2.51714	0.169827
XLOC_029309	Gm1527	ENSMUSG00000074655	0	1.38385		XLOC_019057	H2-DMa	NA	210.452	2.97173		XLOC_020511	Nrtn	ENSMUSG00000039481	58.8821	4.6742
XLOC_029311	Mecom	ENSMUSG00000027684	14.4348	2.99828		XLOC_019063	H2-DMb1,H2-DMb2	ENSMUSG00000079547	131.426	1.67011		XLOC_020528	C3	NA	2179.42	78.3621
XLOC_029322	Lrrc31	ENSMUSG00000074653	26.9849	2.06328		XLOC_019065	Tap1	NA	234.582	6.93578		XLOC_020534	Rpl7a-ps5	NA	2.14864	0
XLOC_029360	RP23-423J10.4	NA	0	1.27381		XLOC_019066	Psmb8	NA	994.38	23.4323		XLOC_020559	Tmem232	ENSMUSG00000045036	0	0.977504
XLOC_029432	RP23-325M18.5	NA	0.7304	0		XLOC_019070	H2-Ab1	NA	866.229	8.53557		XLOC_020579	Lrrc30	NA	0	0.811249
XLOC_029449	2610316D01Rik	NA	0	0.704426		XLOC_019071	H2-Eb1	NA	1404.68	11.2648		XLOC_020597	Gm4707	NA	0.124929	0.731559
XLOC_029463	1700018B24Rik	NA	0	1.98017		XLOC_019072	H2-Eb2	ENSMUSG00000067341	0.806092	0		XLOC_020646	Eif2ak2	ENSMUSG00000024079	24.6174	6.48537
XLOC_029510	Gm30292	NA	0	0.411044		XLOC_019076	BC051142	NA	3.28122	0.326299		XLOC_020655	Cyp1b1	ENSMUSG00000024087	0.356349	18.8969
XLOC_029592	Gm5709	NA	0	0.673964		XLOC_019088	Tnxb	NA	73.2322	7.15818		XLOC_020737	Kcnk12	ENSMUSG00000050138	0	3.83621
XLOC_029738	Rxfp1	NA	47.4946	6.74456		XLOC_019125	H2-D1	NA	2694.1	63.707		XLOC_020745	Fshr	ENSMUSG00000032937	0	11.0684
XLOC_029775	Tlr2	ENSMUSG00000027995	9.78808	2.00555		XLOC_019137	H2-Q4	NA	411.453	8.75488		XLOC_020747	Nrxn1	ENSMUSG00000024109	0.0766674	1.06249
XLOC_029838	Sema4a	NA	30.3424	10.0339		XLOC_019138	H2-Q5	NA	27.9429	1.55049		XLOC_020783	9430020K01Rik	NA	2.59723	34.3614
XLOC_029846	Rab25	NA	28.3116	7.02855		XLOC_019139	H2-Q6	ENSMUSG00000073409	914.295	6.24196		XLOC_020805	Gm5819	ENSMUSG00000092097	1.58189	0
XLOC_029861	Fdps,RP24-394C15.7,Rusc1	NA	70.061	608.723		XLOC_019141	H2-Q7	NA	692.898	7.09137		XLOC_020814	Greb1l	ENSMUSG00000042942	0.93867	7.34838
XLOC_029864	Hcn3	ENSMUSG00000028051	0.522649	6.93473		XLOC_019146	Pou5f1	NA	0	1.77725		XLOC_020875	Dsg2	ENSMUSG00000044393	8.27838	1.32885
XLOC_030121	Hsd3b6	NA	8.22492	22.8561		XLOC_019149	Cdsn	NA	0	0.701766		XLOC_020997	Slc4a9	ENSMUSG00000024485	0	3.14578
XLOC_030125	Hsd3b1	NA	0.24556	1742.41		XLOC_019150	2300002M23Rik	ENSMUSG00000039269	0	1.31219		XLOC_021079	Spink12	NA	24.3967	0
XLOC_030164	Mab21l3	NA	6.16198	0.48113		XLOC_019184	Gm20392	NA	253.918	0		XLOC_021123	Zfp474	NA	0	2.19597
XLOC_030275	Gstm6	ENSMUSG00000068762	0.73212	11.8085		XLOC_019228	Ubd	NA	68.7491	0		XLOC_021181	Iigp1	ENSMUSG00000054072	116.892	4.90585
XLOC_030278	Gstm2	NA	80.7934	220.205		XLOC_019274	Gm26917	NA	265.096	46.1962		XLOC_021242	Onecut2	NA	0	3.48532
XLOC_030306	Fndc7	ENSMUSG00000045326	0.308474	6.98135		XLOC_019334	Crip3	NA	0	3.97252		XLOC_021303	Mro	NA	0.570584	9.27213
XLOC_030388	Tmem56	NA	0.154686	2.89985		XLOC_019337	Cul9	ENSMUSG00000040327	14.3812	0		XLOC_021342	Gm6133	ENSMUSG00000090451	0	0.566102
XLOC_030407	RP24-404P10.2	NA	0.813888	0		XLOC_019338	Ptk7	ENSMUSG00000023972	24.3467	11.1499		XLOC_021358	Gm10524	NA	121.392	23.9782
XLOC_030436	Synpo2	ENSMUSG00000050315	49.3085	18.6539		XLOC_019395	4932415M13Rik,Gm19518	NA	0	2.58778		XLOC_021435	Armc4	NA	0	1.11853
XLOC_030459	Ugt8a	NA	0	0.512346		XLOC_019412	Ebi3	ENSMUSG00000003206	12.8151	0.0489863		XLOC_021497	Dsc2	ENSMUSG00000024331	15.3249	0.805223
XLOC_030514	Hadh	NA	43.5277	99.262		XLOC_019442	Pspn	NA	0	4.40691		XLOC_021603	Nrg2	NA	16.713	0.784033
XLOC_030515	RP24-434E24.5	NA	0	0.61		XLOC_019450	Vav1	NA	50.1211	1.07046		XLOC_021763	Synpo	ENSMUSG00000043079	9.2134	38.4846
XLOC_030517	Sgms2	NA	34.8518	10.8514		XLOC_019451	Adgre1	ENSMUSG00000004730	16.712	0.717825		XLOC_021767	Slc6a7	ENSMUSG00000052026	0	2.10899
XLOC_030568	Gm4861	NA	0.921091	0		XLOC_019514	Ehd3	NA	1.50183	13.6042		XLOC_021780	Mir143,Mir143hg,Mir145a	NA	60.4365	9.24241
XLOC_030610	Bmpr1b	NA	0.280159	4.89955		XLOC_019529	Crim1	ENSMUSG00000024074	1.72522	17.4695		XLOC_021816	Ccbe1	ENSMUSG00000046318	0.384831	4.67817
XLOC_030674	Rpsa-ps10	NA	586.774	228.635		XLOC_019577	Gm24240	NA	6.92127	0		XLOC_021839	Dynap	NA	0	3.81826
XLOC_030686	Ptgfr	NA	0.531784	62.5412		XLOC_019621	Ttc7	ENSMUSG00000036918	35.779	3.79413		XLOC_021861	Lipg	ENSMUSG00000053846	3.44022	31.1629
XLOC_030773	Gm37689	NA	0	1.08902		XLOC_019639	Gtf2a1l	ENSMUSG00000024154	0	0.483899		XLOC_021875	A330094K24Rik	NA	0	1.14174
XLOC_030809	Gm11830	NA	0	0.714177		XLOC_019664	Gm20939	ENSMUSG00000095193	0	0.793404		XLOC_021923	Tshz1	NA	5.13849	19.7032
XLOC_030886	Ggh	NA	90.6488	27.2992		XLOC_019665	Gm10232	NA	9.3001	0		XLOC_021931	Cndp1	NA	7.12782	0.72369
XLOC_031010	Spink4	ENSMUSG00000028415	0	1.72002		XLOC_019702	Tmem181c-ps	NA	0	1.1416		XLOC_021933	Cndp2	ENSMUSG00000024644	293.365	46.2871
XLOC_031562	C8b	ENSMUSG00000029656	0	0.635657		XLOC_019728	Rnaset2a	NA	103.062	15.2618		XLOC_022034	Slc22a20	NA	0	2.80993
XLOC_031657	Pdzk1ip1	ENSMUSG00000028716	54.1626	17.642		XLOC_019748	Gm7162	NA	0	0.49762		XLOC_022137	Fads3	ENSMUSG00000024664	11.6717	47.4047
XLOC_031775	Col9a2	ENSMUSG00000028626	0.877978	4.54497		XLOC_019757	Gpr31b	NA	4.1027	0		XLOC_022143	Syt7	ENSMUSG00000024743	0.567835	4.17654
XLOC_031795	Mycl	ENSMUSG00000028654	4.02974	14.0861		XLOC_019783	Dact2	ENSMUSG00000048826	17.8672	1.41843		XLOC_022173	Oosp3	NA	0	2.0735
XLOC_031808	Gm25788	NA	48.065	0		XLOC_019903	Prss30	ENSMUSG00000024124	0.533084	0		XLOC_022260	Aldh1a1	ENSMUSG00000053279	37.2783	146.307
XLOC_031846	Grik3	NA	0	1.46719		XLOC_019908	Pdpk1	NA	0.697147	4.3705		XLOC_022285	Gm6563	ENSMUSG00000051255	0	0.588837
XLOC_031857	Col8a2	NA	20.9732	9.0101		XLOC_019967	Gm26694	NA	0	4.40759		XLOC_022392	Cyp26a1	ENSMUSG00000024987	2.76361	28.048
XLOC_032002	Paqr7	ENSMUSG00000037348	1.88846	10.8062		XLOC_019989	Gm20468	NA	0	1.49586		XLOC_022398	Lgi1	NA	0	1.23206
XLOC_032048	Wnt4	NA	19.8909	43.0141		XLOC_020000	Grm4	ENSMUSG00000063239	0	0.71525		XLOC_022444	Golga7b	ENSMUSG00000042532	0	3.37865
XLOC_032105	Padi2	NA	13.8967	35.4839		XLOC_020019	Tulp1	NA	24.8991	1.63857		XLOC_022449	Cnnm1	ENSMUSG00000025189	0	1.55609
XLOC_032160	Gm13023	NA	0	4.05637		XLOC_020039	Cpne5	NA	8.3079	0.0880997		XLOC_022465	Pax2	NA	9.78373	0.998425
XLOC_032168	Oog2	NA	0	1.35323		XLOC_020049	Gm28043	NA	0	1.93658		XLOC_022475	Kazald1	NA	1.12397	67.5377
XLOC_032317	Errfi1	NA	101.138	31.935		XLOC_020088	Zfp811	ENSMUSG00000055202	0	1.00621		XLOC_022526	1700054A03Rik	NA	0.708953	0
XLOC_032356	Mmel1	NA	0.323456	21.2622		XLOC_020094	Cyp4f14	ENSMUSG00000024292	0	5.73302		XLOC_022552	Habp2	ENSMUSG00000025075	0	0.49116
XLOC_032428	Sdr16c6	NA	1.35396	0		XLOC_020135	H2-Aa	ENSMUSG00000036594	318.56	10.3		XLOC_022578	Slc18a2	ENSMUSG00000025094	1.34773	21.5591
XLOC_032507	Slc26a7	NA	0.843864	4.9031		XLOC_020137	H2-Ea-ps	NA	520.151	2.11766		XLOC_022618	Aldh3b1	ENSMUSG00000024885	3.00839	18.6036
XLOC_032543	Atp6v0d2	NA	51.2247	10.1585		XLOC_020157	C4b	NA	292.574	3.94339		XLOC_022649	2010003K11Rik	ENSMUSG00000042041	0	7.40045
XLOC_032625	1700003M02Rik	NA	0.123081	3.93493		XLOC_020186	Gm23442	NA	118.266	9.53741		XLOC_022663	Npas4	ENSMUSG00000045903	9.11885	1.2674
XLOC_032638	Gm12366	NA	342.539	68.7893		XLOC_020189	Aif1	ENSMUSG00000024397	230.604	4.76732		XLOC_022727	Ccdc88b	ENSMUSG00000047810	5.54481	0.364192
XLOC_032688	1110017D15Rik	NA	0	11.9741		XLOC_020190	Lst1	NA	223.572	8.16806		XLOC_022779	Snora57	NA	15.0279	0
XLOC_032691	Cntfr	ENSMUSG00000028444	0.270017	3.26503		XLOC_020197	Gm18733	NA	0	0.613495		XLOC_022783	Scgb1a1	NA	0	2.13928
XLOC_032697	Gm12407	NA	0	3.95059		XLOC_020228	H2-T23	NA	402.234	17.0637		XLOC_022817	Ms4a10	ENSMUSG00000024731	0	1.53142
XLOC_032707	Ccl21a	ENSMUSG00000094686	1.94174	25.1231		XLOC_020235	H2-T10	NA	34.9545	2.08914		XLOC_022819	Ms4a18	NA	0.89531	0
XLOC_032800	Aldob	NA	0	0.47861		XLOC_020240	H2-T3	ENSMUSG00000054128	0.811037	0		XLOC_022844	Oosp1	NA	0	9.41416
XLOC_032875	Svep1	NA	4.57158	1.55225		XLOC_020289	Olfr753-ps1	NA	0.819128	0		XLOC_022912	Pcsk5	ENSMUSG00000024713	3.27137	74.9204
XLOC_032950	Tnc	NA	7.8906	47.8501		XLOC_020290	Gm20497	NA	2.69812	0		XLOC_022925	Gm6684	NA	0.95068	0
XLOC_032990	Ptprd	NA	1.69745	6.53084		XLOC_020340	Adgrf4	NA	1.67594	21.2631		XLOC_022954	Fam189a2	ENSMUSG00000071604	50.6279	7.85583
XLOC_033053	C87499	NA	0	1.45506		XLOC_020360	Runx2	NA	1.45614	14.5432		XLOC_022962	Pgm5	NA	58.9513	9.18242
XLOC_033080	Cdkn2b	ENSMUSG00000073802	1.43151	11.442		XLOC_020390	Gm26904	NA	6.03493	0.293716		XLOC_022983	Glis3	ENSMUSG00000052942	10.2613	1.89066
XLOC_033086	Elavl2	NA	0.0169121	1.31541		XLOC_020392	Gm26904	NA	9.0915	0		XLOC_022999	Rln1	NA	0	0.998585
XLOC_033118	Gm830	NA	0	0.882236		XLOC_020394	Gm26904	NA	32.0927	0.803408		XLOC_023045	Pank1	ENSMUSG00000033610	4.35696	27.9001
XLOC_033129	Cyp2j11	NA	0	0.768534		XLOC_020395	Gm26904	NA	22.1083	0		XLOC_023136	Crtac1	ENSMUSG00000042401	2.84826	0
XLOC_033137	Gm12695	ENSMUSG00000078639	0	0.665445		XLOC_020396	Gm26904	NA	26.1544	0		XLOC_023187	Kcnip2	NA	0.148089	1.95877
XLOC_033186	C130073F10Rik	NA	0	0.97714		XLOC_020398	Gm26904	NA	0	0.62249		XLOC_023201	Cyp17a1	NA	0	37.0317
XLOC_033227	Dio1	NA	0.096568	0.686977		XLOC_020402	Gm26904	NA	5.62928	1.69844		XLOC_023262	Ablim1	NA	3.84055	20.6913
XLOC_033318	Tex38	NA	0	1.16916		XLOC_020404	Gnmt	ENSMUSG00000002769	3.02353	1.09322		XLOC_023267	Gfra1	NA	1.30974	0.0336107
XLOC_033357	Klf17	ENSMUSG00000048626	0	0.673901		XLOC_020405	Gm26904	NA	0	0.667615		XLOC_023355	Gm13391	NA	0	1.56448
XLOC_033406	Ccdc30	ENSMUSG00000028637	0.54458	4.67778		XLOC_020465	Sgol1	NA	0.286297	8.34579		XLOC_023365	Gm13219	NA	0	3.0765
XLOC_033417	Guca2b	ENSMUSG00000032978	369.59	104.716		XLOC_020495	Lrg1	ENSMUSG00000037095	211.41	16.1117		XLOC_023550	Plxdc2	NA	2.2631	17.4223
XLOC_033508	Gm12929	NA	0	2.03468		XLOC_020521	Slc25a41	NA	0.513851	0		XLOC_023574	4930447M23Rik	NA	1.39496	0
XLOC_033549	Zbtb8b	NA	1.65837	7.91372		XLOC_020534	Rpl7a-ps5	NA	1.04249	0		XLOC_023578	1810010K12Rik	NA	0.508612	0
XLOC_033737	Cda	NA	11.8621	82.0812		XLOC_020559	Tmem232	ENSMUSG00000045036	0	0.93942		XLOC_023680	Kcnt1	NA	0.0238067	3.60713
XLOC_033741	Ubxn10	ENSMUSG00000043621	0.157063	1.51057		XLOC_020579	Lrrc30	NA	0	0.77991		XLOC_023729	Col5a1	NA	63.5994	14.9445
XLOC_033746	Pla2g5	NA	0.097052	20.7588		XLOC_020618	Xdh	ENSMUSG00000024066	176.326	12.7822		XLOC_023816	Hmcn2	ENSMUSG00000055632	42.7896	3.69835
XLOC_033778	Padi6	NA	0	22.352		XLOC_020665	Cdkl4	ENSMUSG00000033966	0	1.17644		XLOC_023825	Aif1l	NA	4.6765	18.8664
XLOC_033779	Padi4	NA	3.45965	0.53535		XLOC_020737	Kcnk12	ENSMUSG00000050138	0	3.68639		XLOC_023894	Morn5	NA	0	2.59428
XLOC_033795	Fblim1	NA	40.8049	16.7905		XLOC_020744	Lhcgr	ENSMUSG00000024107	0	51.0203		XLOC_024000	Kif5c	NA	19.5945	2.12966
XLOC_033814	Pdpn	NA	3.0437	23.1426		XLOC_020745	Fshr	ENSMUSG00000032937	0	10.6376		XLOC_024088	Csrnp3	NA	3.11741	0.566653
XLOC_033815	Oog4	NA	0	1.56913		XLOC_020747	Nrxn1	ENSMUSG00000024109	0	1.02133		XLOC_024111	4932414N04Rik	NA	0.597828	0
XLOC_033825	Gm13084	NA	0	3.72209		XLOC_020783	9430020K01Rik	NA	2.6185	33.0355		XLOC_024121	G6pc2	NA	0	0.517469
XLOC_033835	C87977	NA	0	5.53944		XLOC_020986	Pura	NA	0.775635	7.08431		XLOC_024124	Dhrs9	NA	12.4994	0.702344
XLOC_033911	Angptl7	NA	43.3337	4.86744		XLOC_021079	Spink12	NA	3.31785	0		XLOC_024132	Mettl5os	NA	0	1.24535
XLOC_033944	Spsb1	NA	9.26995	39.5307		XLOC_021088	Kcnn2	NA	0	1.7016		XLOC_024134	Myo3b	NA	5.57453	0.169815
XLOC_033953	H6pd	NA	36.755	15.8364		XLOC_021117	Prr16	ENSMUSG00000073565	0	1.41191		XLOC_024301	Slc43a3	NA	11.0147	89.315
XLOC_033972	Espn	NA	1.22934	5.26582		XLOC_021123	Zfp474	NA	0	2.11053		XLOC_024448	Chrm4	NA	0	1.08642
XLOC_033993	Trp73	NA	0.0200018	0.5463		XLOC_021138	Gm4221	NA	51.7774	0		XLOC_024545	Wt1	NA	29.0549	118.194
XLOC_034006	Tnfrsf14	NA	3.5029	0.315841		XLOC_021145	Gramd3	ENSMUSG00000001700	49.0094	8.12001		XLOC_024686	Sptbn5	NA	0	1.46212
XLOC_034008	Plch2	NA	1.25343	13.3072		XLOC_021162	Slc27a6	NA	0	0.868125		XLOC_024703	Ckmt1	ENSMUSG00000000308	263.808	4.48265
XLOC_034105	Abcb1b	ENSMUSG00000028970	18.7573	109.479		XLOC_021181	Iigp1	ENSMUSG00000054072	51.1184	4.71524		XLOC_024726	AA467197	ENSMUSG00000033213	0	3.50096
XLOC_034153	Sema3d	NA	0.0535676	4.42985		XLOC_021188	Cd74	ENSMUSG00000024610	4323.97	33.2968		XLOC_024760	Astl	ENSMUSG00000050468	0	3.54478
XLOC_034229	Lrrc17	NA	40.6338	16.2612		XLOC_021242	Onecut2	NA	0	3.35031		XLOC_024793	Slc20a1	NA	17.5796	74.9275
XLOC_034291	RP23-56M18.5	NA	0	1.47042		XLOC_021297	Mex3c	ENSMUSG00000037253	2.48828	31.4331		XLOC_024867	Bmp2	NA	1.32462	104.62
XLOC_034292	RP23-56M18.8	NA	0	0.68505		XLOC_021303	Mro	NA	0	8.91332		XLOC_024878	Ankef1	ENSMUSG00000074771	0.0323135	0.536864
XLOC_034293	RP23-56M18.6	NA	0	7.26612		XLOC_021358	Gm10524	NA	328.872	23.0469		XLOC_024931	Slc24a3	NA	21.8184	3.42694
XLOC_034294	Gm5067	NA	0	2.55714		XLOC_021376	Fam69c	NA	0.827959	0		XLOC_024939	Cfap61	ENSMUSG00000037143	0	1.46658
XLOC_034296	RP24-162F23.9	NA	0	4.11555		XLOC_021428	Kif5b	NA	2.39404	13.2336		XLOC_024963	Cst12	NA	0	58.7057
XLOC_034298	Gm10471	ENSMUSG00000073116	0	1.06992		XLOC_021435	Armc4	NA	0	1.07516		XLOC_024971	Syndig1	NA	6.88007	0.434454
XLOC_034300	Gm10220	ENSMUSG00000067698	0	1.12487		XLOC_021459	Abhd3	NA	0	3.11332		XLOC_025007	Angpt4	NA	1.52214	29.6738
XLOC_034306	Gm7361	ENSMUSG00000059645	0	1.95448		XLOC_021490	Chst9	NA	0.549988	0		XLOC_025008	Gm14154	NA	0	0.826187
XLOC_034317	Insig1	ENSMUSG00000045294	16.4096	46.4862		XLOC_021610	Cd14	ENSMUSG00000051439	72.2802	7.18004		XLOC_025047	Mylk2	NA	1.0903	0
XLOC_034342	Drc1	NA	0.168066	3.03348		XLOC_021675	Gpr151	NA	0	1.40998		XLOC_025067	Bpifb6	NA	0	19.4737
XLOC_034344	1700001C02Rik	NA	0	6.79524		XLOC_021684	Spink3	ENSMUSG00000024503	71.8849	522.321		XLOC_025069	Bpifb4	NA	0.290798	9.92648
XLOC_034346	Kcnk3	NA	1.61987	32.0641		XLOC_021712	Ticam2,Tmed7	NA	7.17118	39.2661		XLOC_025101	Procr	NA	5.44351	27.7943
XLOC_034365	Tcf23	ENSMUSG00000006642	31.3429	8.69938		XLOC_021713	Cdo1	NA	161.349	10.4944		XLOC_025121	Myl9	NA	1519.31	164.576
XLOC_034454	Dok7	NA	0.245868	2.4553		XLOC_021839	Dynap	NA	0	3.66962		XLOC_025142	Lbp	NA	11.5998	48.1608
XLOC_034474	Jakmip1	ENSMUSG00000063646	3.2802	0.520856		XLOC_021861	Lipg	ENSMUSG00000053846	2.05121	29.9601		XLOC_025193	Tox2	NA	0.728017	14.9382
XLOC_034506	RP23-144P3.1	NA	780.803	267.321		XLOC_021875	A330094K24Rik	NA	0	1.09745		XLOC_025205	Wisp2	NA	0.564763	20.7844
XLOC_034531	RP24-230J14.4	NA	1063.76	193.208		XLOC_021933	Cndp2	ENSMUSG00000024644	392.448	44.4962		XLOC_025222	Wfdc2	NA	1574.42	132.332
XLOC_034593	Sod3	ENSMUSG00000072941	0.374206	7.191		XLOC_021948	9330132A10Rik	NA	0	0.688098		XLOC_025244	Cd40	NA	2.20064	0.174568
XLOC_034719	Uchl1	NA	10.2934	47.116		XLOC_021963	Unc93b1	NA	137.625	20.1451		XLOC_025248	Eya2	NA	42.873	6.60139
XLOC_034749	Cwh43	NA	25.1167	4.18154		XLOC_021971	Cabp2	NA	0.641469	0		XLOC_025329	Tfap2c	NA	0.310099	4.73279
XLOC_034819	Csn1s2a	NA	0	0.495237		XLOC_022001	Cd248	ENSMUSG00000056481	97.0144	13.5643		XLOC_025333	Ctcfl,Ctcflos	ENSMUSG00000070495	4.72193	0.141872
XLOC_034871	Ereg	ENSMUSG00000029377	0.361511	3.76695		XLOC_022034	Slc22a20	NA	0	2.70104		XLOC_025355	Edn3	NA	0	1.38102
XLOC_034886	Fam47e	NA	0	5.5165		XLOC_022126	Pcna-ps2	NA	0	5.42391		XLOC_025380	Gm14435	ENSMUSG00000089951	0	1.76039
XLOC_034904	AA792892	ENSMUSG00000073497	0	0.597873		XLOC_022137	Fads3	ENSMUSG00000024664	5.66594	45.5698		XLOC_025426	Slco4a1	NA	19.0007	2.90866
XLOC_034929	RP24-142B15.2	NA	0	2.64226		XLOC_022147	Vwce	ENSMUSG00000043789	0	2.12573		XLOC_025481	Meig1	NA	0	1.44411
XLOC_034948	1700007G11Rik	ENSMUSG00000057816	0	1.67725		XLOC_022166	Gm8369	NA	1.70431	0		XLOC_025503	Optn	ENSMUSG00000026672	4.2969	24.8167
XLOC_034952	Bmp3	ENSMUSG00000029335	0.308536	2.78441		XLOC_022167	Ms4a6b	ENSMUSG00000024677	9.25133	0.912043		XLOC_025512	Proser2	NA	16.4164	2.55315
XLOC_035016	Spp1	NA	18.7721	75.2189		XLOC_022173	Oosp3	NA	0	1.99369		XLOC_025533	9230102O04Rik,Gata3	NA	0.623135	20.7391
XLOC_035156	Crybb1	NA	0	0.749927		XLOC_022177	Olfr1417	ENSMUSG00000048292	3.29219	0		XLOC_025613	Mllt10	NA	0	0.88145
XLOC_035198	Fam222a	ENSMUSG00000041930	0.342203	4.97048		XLOC_022190	Mpeg1	NA	42.1095	2.68862		XLOC_025666	Pax8	ENSMUSG00000026976	26.23	5.52634
XLOC_035220	Pla2g1b	NA	0	1.27247		XLOC_022250	2410127L17Rik	ENSMUSG00000024726	1.94468	16.0654		XLOC_025685	Gm13387	NA	0	0.834482
XLOC_035328	P2rx7	NA	12.0926	2.13924		XLOC_022257	1500015L24Rik	NA	1.58297	0		XLOC_025750	Stkld1	ENSMUSG00000049897	0	0.956576
XLOC_035357	Lrrc43	ENSMUSG00000063409	0	1.44382		XLOC_022260	Aldh1a1	ENSMUSG00000053279	18.379	140.659		XLOC_025752	Slc2a6	NA	10.0545	0.658448
XLOC_035386	Dnah10	ENSMUSG00000038011	0.0953016	1.80464		XLOC_022363	Ifit3	ENSMUSG00000074896	115.412	4.76897		XLOC_025775	1700007K13Rik	ENSMUSG00000026831	0	12.3178
XLOC_035408	Tmem132c	ENSMUSG00000034324	4.94285	0.431557		XLOC_022365	Ifit1	NA	39.1577	2.57275		XLOC_025811	Gm14486	NA	0	1.65446
XLOC_035436	Gm23245	NA	24.3307	0		XLOC_022444	Golga7b	ENSMUSG00000042532	0	3.24843		XLOC_025813	9330198N18Rik	NA	0	2.54542
XLOC_035479	Cldn3	NA	152.401	32.9797		XLOC_022449	Cnnm1	ENSMUSG00000025189	0	1.49576		XLOC_025821	Ptges	ENSMUSG00000050737	4.30534	51.5337
XLOC_035500	Zp3	ENSMUSG00000004948	0	24.3829		XLOC_022465	Pax2	NA	12.543	0.959528		XLOC_025843	Lcn2	NA	3778.86	19.4158
XLOC_035761	Rxfp2	NA	4.16785	0.0877531		XLOC_022475	Kazald1	NA	0.968607	64.9475		XLOC_025886	Traf1	NA	11.224	1.53296
XLOC_035785	Cyp51	ENSMUSG00000001467	16.0352	51.2474		XLOC_022514	Gsto1	NA	830.835	79.7162		XLOC_025980	Nmi	NA	44.707	10.0224
XLOC_035954	Fam126a	NA	8.11467	19.1051		XLOC_022528	Add3	ENSMUSG00000025026	5.82283	40.4477		XLOC_025994	Rprm	ENSMUSG00000075334	78.8202	20.1913
XLOC_036145	Msx1	NA	30.8013	5.614		XLOC_022555	Plekhs1	ENSMUSG00000035818	175.852	9.87137		XLOC_026031	Itgb6	NA	3.47693	0.195584
XLOC_036183	Prom1	ENSMUSG00000029086	57.313	18.6466		XLOC_022560	Tdrd1	NA	0	0.734174		XLOC_026058	Grb14	NA	3.82775	62.8423
XLOC_036274	RP24-373A18.1	NA	1.62705	0		XLOC_022576	Eno4	ENSMUSG00000048029	0	1.65694		XLOC_026059	Cobll1	NA	1.93394	8.71038
XLOC_036351	9130230L23Rik	ENSMUSG00000054598	0.154887	2.60069		XLOC_022578	Slc18a2	ENSMUSG00000025094	0.490447	20.7266		XLOC_026068	Galnt3	ENSMUSG00000026994	21.5763	2.45942
XLOC_036392	Zar1	ENSMUSG00000063935	0	11.1958		XLOC_022594	Nanos1	ENSMUSG00000072437	0	0.642839		XLOC_026085	Abcb11	ENSMUSG00000027048	0	0.932561
XLOC_036479	Tmprss11g	NA	0.683742	0		XLOC_022616	Tcirg1	NA	374.33	48.9783		XLOC_026086	Lrp2	NA	1.96547	0.143683
XLOC_036513	Sult1d1	NA	56.2943	5.83258		XLOC_022727	Ccdc88b	ENSMUSG00000047810	7.4323	0.350162		XLOC_026192	Cwc22	NA	108.886	14.2639
XLOC_036579	C87414	NA	0.0727359	3.8257		XLOC_022783	Scgb1a1	NA	0	2.05568		XLOC_026218	Gm13680	NA	73.7061	16.413
XLOC_036646	Mapk10	NA	0.0538147	0.852008		XLOC_022809	Pga5	ENSMUSG00000024738	4.37022	0		XLOC_026229	Tfpi	ENSMUSG00000027082	26.4457	123.767
XLOC_036654	Slc10a6	NA	8.56418	1.28383		XLOC_022812	Cd6	ENSMUSG00000024670	1.21	0		XLOC_026256	4833423E24Rik	ENSMUSG00000075217	103.016	7.40954
XLOC_036830	Tmem119	ENSMUSG00000054675	32.4755	12.2642		XLOC_022817	Ms4a10	ENSMUSG00000024731	0	1.47193		XLOC_026426	Olfr1250	ENSMUSG00000075078	0	1.65267
XLOC_036870	Cox6a1	NA	277.687	613.614		XLOC_022822	AW112010	NA	400.176	8.36914		XLOC_026436	Olfr1259	NA	0.805399	0
XLOC_036925	Oas2	NA	40.8295	11.0878		XLOC_022833	Ms4a7	ENSMUSG00000024672	37.0807	2.09721		XLOC_026497	Accsl	NA	0	2.91806
XLOC_036991	Pitpnm2	ENSMUSG00000029406	7.52258	42.694		XLOC_022839	Ms4a6d	ENSMUSG00000024679	30.145	3.25538		XLOC_026543	A930006I01Rik	NA	0	1.44089
XLOC_037005	RP23-363M4.1	NA	0	0.625063		XLOC_022844	Oosp1	NA	0	9.04879		XLOC_026545	BC016548	NA	0	1.13628
XLOC_037006	Scarb1	NA	68.4465	517.873		XLOC_022954	Fam189a2	ENSMUSG00000071604	141.121	7.55304		XLOC_026590	BB218582	NA	0	1.50631
XLOC_037095	Cldn4	ENSMUSG00000047501	18.9833	3.36877		XLOC_023045	Pank1	ENSMUSG00000033610	1.07765	26.8181		XLOC_026611	Bbox1	NA	0	0.703604
XLOC_037146	Serpine1	NA	6.10945	19.6966		XLOC_023056	1500017E21Rik	NA	0	1.30871		XLOC_026657	Grem1	NA	0	6.25708
XLOC_037165	Fbxo24,Pcolce	ENSMUSG00000089984;ENSMUSG00000029718	105.619	332.985		XLOC_023068	Cyp26c1	ENSMUSG00000062432	0	0.443615		XLOC_026697	Plcb2	NA	0.517776	4.40706
XLOC_037230	Radil	ENSMUSG00000029576	9.11333	2.31804		XLOC_023156	Cpn1	ENSMUSG00000025196	0	1.37355		XLOC_026752	Gm14001	NA	1.74995	0
XLOC_037246	RP23-301L9.7	NA	0	0.811787		XLOC_023201	Cyp17a1	NA	0	35.5942		XLOC_026758	Frmd5	ENSMUSG00000027238	0.0140265	10.2878
XLOC_037348	Zar1l	NA	0	1.65914		XLOC_023249	Gpam	NA	4.73742	41.3848		XLOC_026773	Gatm	ENSMUSG00000027199	9.15571	81.1165
XLOC_037374	Peg10	NA	1.34457	4.99652		XLOC_023355	Gm13391	NA	0	1.50395		XLOC_026795	Hdc	NA	8.57221	37.1863
XLOC_037394	Tac1	NA	0	1.16952		XLOC_023365	Gm13219	NA	0	2.95757		XLOC_026814	Mal	ENSMUSG00000027375	14.7216	2.75494
XLOC_037416	Foxp2	ENSMUSG00000029563	0.273815	1.32951		XLOC_023497	Prkcq	ENSMUSG00000026778	11.7376	0.751437		XLOC_026816	Mall	ENSMUSG00000027377	36.3998	0.730628
XLOC_037418	Mdfic	NA	6.32296	20.1681		XLOC_023604	Apbb1ip	NA	20.7561	1.42818		XLOC_026821	Gm14005	NA	25.0025	2.46039
XLOC_037494	Ahcyl2	NA	33.6885	12.7889		XLOC_023608	Acbd5	ENSMUSG00000026781	1.80583	15.203		XLOC_026888	Erv3	ENSMUSG00000037482	0	13.8965
XLOC_037498	1700023L04Rik	NA	0	2.08142		XLOC_023610	Gm13423	NA	0	0.546511		XLOC_026890	Slc23a2	NA	7.00601	31.1943
XLOC_037529	Gm13847	NA	0.58827	0		XLOC_023743	Ak8	ENSMUSG00000026807	0	1.18031		XLOC_026901	Fermt1	NA	9.96706	1.16303
XLOC_037574	Tmem213	NA	405.91	81.1763		XLOC_023816	Hmcn2	ENSMUSG00000055632	44.2463	3.55577		XLOC_026954	Ovol2	NA	11.2357	0.493693
XLOC_037608	Wee2	NA	0	1.21434		XLOC_023817	Ass1	NA	21.8953	316.289		XLOC_027086	Defb19	NA	0	8.65613
XLOC_037678	Sval2	ENSMUSG00000014104	0.791392	0		XLOC_023825	Aif1l	NA	2.81442	18.1372		XLOC_027149	Fer1l4	NA	12.8292	0.199067
XLOC_037745	Atp6v0e2	ENSMUSG00000039347	8.65931	33.0487		XLOC_023879	Hspa5	ENSMUSG00000026864	43.5297	350.352		XLOC_027197	Tgm2	NA	447.272	41.0449
XLOC_037813	Creb5	ENSMUSG00000053007	4.30863	0.595009		XLOC_023894	Morn5	NA	0	2.49377		XLOC_027237	Jph2	NA	59.3955	5.5269
XLOC_037829	Aqp1	NA	63.8951	21.4169		XLOC_023898	Ptgs1	NA	45.5253	6.51761		XLOC_027292	Slc13a3	NA	1.21258	0
XLOC_038000	Igkv3-10	NA	0	1.62647		XLOC_024039	Kcnj3	NA	0	0.922957		XLOC_027337	Fam65c	ENSMUSG00000074577	0.174692	2.56228
XLOC_038031	St3gal5	NA	11.9742	33.2917		XLOC_024079	Slc4a10	NA	1.25126	0.0512704		XLOC_027398	Zbp1	ENSMUSG00000027514	51.1285	1.56367
XLOC_038061	Reg3b	ENSMUSG00000071356	0.671303	0		XLOC_024121	G6pc2	NA	0	0.497491		XLOC_027399	Pmepa1	ENSMUSG00000038400	43.34	7.27222
XLOC_038104	Atp6v1b1	ENSMUSG00000006269	0	0.781328		XLOC_024132	Mettl5os	NA	0	1.19653		XLOC_027402	Mir6340	NA	39.9462	0
XLOC_038118	Noto	NA	0	1.88095		XLOC_024296	Ube2l6	NA	217.613	16.6123		XLOC_027489	Hrh3	NA	0	1.05762
XLOC_038149	D6Ertd527e	ENSMUSG00000090891	0	1.1902		XLOC_024426	Agbl2	ENSMUSG00000040812	0	0.650839		XLOC_027565	Gm5841	NA	0.410661	0
XLOC_038175	Gm1965	NA	0	1.84783		XLOC_024436	Spi1	NA	145.402	2.45879		XLOC_027567	Stmn2	NA	0.583883	19.8551
XLOC_038196	Gm4287	NA	0.619431	0		XLOC_024437	Mybpc3	ENSMUSG00000002100	0	0.894875		XLOC_027616	Car2	NA	619.243	25.6246
XLOC_038205	Aldh1l1	ENSMUSG00000030088	2.31573	16.3438		XLOC_024441	Pacsin3	NA	130.387	17.61		XLOC_027692	Tnfsf10	ENSMUSG00000039304	14.2747	2.37295
XLOC_038276	Bhlhe40	NA	8.41754	24.5522		XLOC_024448	Chrm4	NA	0	1.04407		XLOC_027733	Kcnmb2	NA	0	0.869194
XLOC_038324	Pparg	ENSMUSG00000000440	0.652058	9.61269		XLOC_024545	Wt1	NA	16.5545	113.629		XLOC_027877	Gm5103	NA	0	0.800663
XLOC_038345	8430408G22Rik	ENSMUSG00000048489	151.389	25.4065		XLOC_024559	Mpped2	ENSMUSG00000016386	0.0373614	1.29445		XLOC_027884	Mgst2	NA	1.13317	39.7654
XLOC_038346	Cxcl12	NA	73.6325	25.0718		XLOC_024571	Bdnf	NA	0	2.34374		XLOC_027912	Stoml3	ENSMUSG00000027744	0	1.54605
XLOC_038373	Ninj2	NA	0	2.14462		XLOC_024613	Fmn1	ENSMUSG00000100934	0.0474309	0.850897		XLOC_027933	Dclk1	ENSMUSG00000027797	46.5094	5.75696
XLOC_038389	Slc6a12	NA	2.2478	33.5596		XLOC_024658	Casc5	ENSMUSG00000027326	0.0735891	1.80117		XLOC_028119	RP23-187I18.1	NA	0	1.541
XLOC_038391	A2m	ENSMUSG00000030111	12.788	178.246		XLOC_024725	Spata5l1	NA	0	7.14565		XLOC_028141	Sfrp2	NA	4.4419	38.4033
XLOC_038453	Pianp	NA	8.51886	0.739444		XLOC_024732	Sema6d	NA	0.984043	8.57069		XLOC_028158	Sh3d19	NA	32.4519	8.57585
XLOC_038603	Ptpro	ENSMUSG00000030223	9.40325	0.499174		XLOC_024760	Astl	ENSMUSG00000050468	0	3.40826		XLOC_028187	Crabp2	NA	43.8199	8.58859
XLOC_038610	Pik3c2g	ENSMUSG00000030228	0.307185	202.037		XLOC_024867	Bmp2	NA	3.12169	100.578		XLOC_028233	Muc1	NA	347.612	4.22841
XLOC_038751	Dlx5	NA	23.5517	4.06348		XLOC_024878	Ankef1	ENSMUSG00000074771	0	0.516129		XLOC_028249	Pbxip1	NA	87.1335	19.4331
XLOC_038790	Asz1	ENSMUSG00000010796	0	0.556856		XLOC_024886	Btbd3	NA	1.59838	18.0435		XLOC_028264	Gm16540	NA	1.08802	0
XLOC_038895	Akr1b3	NA	51.7472	150.598		XLOC_024898	Macrod2	NA	0	2.70886		XLOC_028290	RP23-326D6.5,S100a3,S100a4	NA	27.6866	307.569
XLOC_038980	Trpv6	NA	42.0258	12.458		XLOC_024939	Cfap61	ENSMUSG00000037143	0	1.40956		XLOC_028293	S100a6	ENSMUSG00000001025	227.374	1685.32
XLOC_039002	Nobox	NA	0	3.10533		XLOC_024963	Cst12	NA	0	56.4262		XLOC_028298	S100a8	NA	0	14.0272
XLOC_039090	Jazf1	NA	23.2817	8.17448		XLOC_024964	Cst8	ENSMUSG00000027442	0	83.5086		XLOC_028309	RP23-381I16.6	NA	0.768512	0
XLOC_039154	Nap1l5	ENSMUSG00000055430	2.07544	44.7433		XLOC_024971	Syndig1	NA	4.38776	0.417666		XLOC_028317	Sprr2f	NA	5004.38	9.96134
XLOC_039251	Igkv4-59	NA	1.52981	0		XLOC_025007	Angpt4	NA	0.556766	28.5274		XLOC_028351	Tchhl1	ENSMUSG00000027908	0	0.387891
XLOC_039321	Atoh8	ENSMUSG00000037621	54.9368	121.929		XLOC_025051	Hck	ENSMUSG00000003283	26.3823	0.672109		XLOC_028506	Hmgcs2	NA	2.94665	77.5378
XLOC_039338	Dnah6	ENSMUSG00000052861	0.201522	2.44225		XLOC_025067	Bpifb6	NA	0	18.7199		XLOC_028533	Vtcn1	NA	36.9771	2.85015
XLOC_039350	Reg3g	ENSMUSG00000030017	0.487237	0		XLOC_025069	Bpifb4	NA	0	9.54313		XLOC_028534	Trim45	NA	18.7585	2.55674
XLOC_039391	Actg2	ENSMUSG00000059430	567.054	242.315		XLOC_025143	Snhg11	NA	0.0498715	2.93854		XLOC_028586	Ap4b1,Bcl2l15,RP24-180F7.1	NA	55.961	9.91116
XLOC_039403	Cyp26b1	ENSMUSG00000063415	5.00648	1.20283		XLOC_025193	Tox2	NA	1.82549	14.3588		XLOC_028615	RP24-500I24.7	NA	0.845617	0
XLOC_039485	Gm839	NA	0	0.480894		XLOC_025205	Wisp2	NA	1.22061	19.9886		XLOC_028661	Sort1	NA	18.3806	4.37075
XLOC_039487	Plxna1	ENSMUSG00000030084	9.78687	23.4038		XLOC_025222	Wfdc2	NA	993.167	127.235		XLOC_028740	RP23-235E15.1	NA	0	2.72949
XLOC_039503	Ccdc37	NA	0.402667	2.73176		XLOC_025227	Wfdc13	NA	2.46848	0		XLOC_028752	Cnn3	ENSMUSG00000053931	81.0647	344.335
XLOC_039579	Il5ra	ENSMUSG00000005364	0.537178	0		XLOC_025244	Cd40	NA	2.98937	0.167811		XLOC_028754	A530020G20Rik	NA	1.30458	42.8675
XLOC_039597	Ssu2	NA	1.93663	41.035		XLOC_025329	Tfap2c	NA	0.29293	4.5492		XLOC_028770	RP23-192O12.4	NA	0	0.682625
XLOC_039598	Oxtr	ENSMUSG00000049112	1.2395	13.1177		XLOC_025380	Gm14435	ENSMUSG00000089951	0	1.6921		XLOC_028853	RP23-246L14.3	NA	0	0.813736
XLOC_039644	Gm8213	NA	1.13477	0		XLOC_025429	Ogfr	NA	95.1147	17.7226		XLOC_028860	Lef1	NA	1.20189	13.6186
XLOC_039706	Rimklb	NA	0.164258	9.40368		XLOC_025533	9230102O04Rik,Gata3	NA	1.11795	19.9278		XLOC_028871	RP23-292C19.1	NA	0	4.1336
XLOC_039711	Gdf3	ENSMUSG00000030117	0.793851	0		XLOC_025552	Pfkfb3	NA	56.3478	7.72962		XLOC_028908	Slc39a8	NA	39.079	9.32421
XLOC_039738	Clstn3	NA	0.792164	8.2057		XLOC_025600	Nebl	ENSMUSG00000053702	0.140343	2.59627		XLOC_028940	Adh1	NA	284.513	72.3739
XLOC_039739	C1s1	NA	63.6527	24.0288		XLOC_025613	Mllt10	NA	0	0.847251		XLOC_028960	Gbp5	NA	14.4874	1.13332
XLOC_039770	Tuba3a	ENSMUSG00000067702	0	0.638399		XLOC_025666	Pax8	ENSMUSG00000026976	44.3102	5.31175		XLOC_028962	Gbp7	NA	25.1526	1.98956
XLOC_039787	Ccnd2	ENSMUSG00000000184	2.87498	13.2563		XLOC_025669	Cacna1b	ENSMUSG00000004113	1.52581	0.0497816		XLOC_028963	Gbp3	NA	30.0303	4.2751
XLOC_039809	BC048546	ENSMUSG00000047228	0.599759	3.15963		XLOC_025752	Slc2a6	NA	51.0144	0.633079		XLOC_028964	Gbp2b	NA	46.7476	0.436319
XLOC_039815	Klrb1b,Klrb1c	NA	2.89063	0.321037		XLOC_025779	1700026L06Rik	NA	0	3.55777		XLOC_028965	Gbp2	NA	65.5386	5.74734
XLOC_039854	Klra8	NA	1.49472	0		XLOC_025811	Gm14486	NA	0	1.59034		XLOC_028998	RP24-277E17.1	NA	0.503471	0
XLOC_039857	Klra9	NA	0.739458	0		XLOC_025813	9330198N18Rik	NA	0	2.44682		XLOC_029020	Uox	NA	38.0238	1.44221
XLOC_039858	Klra7	ENSMUSG00000067599	4.43405	0.174739		XLOC_025821	Ptges	ENSMUSG00000050737	10.3984	49.554		XLOC_029097	Negr1	NA	1.45355	0.145288
XLOC_039919	E330021D16Rik	ENSMUSG00000045291	0	5.06673		XLOC_025843	Lcn2	NA	196.251	18.6637		XLOC_029185	Fabp4	ENSMUSG00000062515	2.69367	117.432
XLOC_039921	Plbd1	NA	5.3161	26.4377		XLOC_025886	Traf1	NA	11.7296	1.4737		XLOC_029217	Gm33819	NA	0.910534	0
XLOC_039927	Art4	ENSMUSG00000030217	0.419751	4.29751		XLOC_025901	Ttll11	NA	0	0.557397		XLOC_029309	Gm1527	ENSMUSG00000074655	0	1.27668
XLOC_039931	Rerg	ENSMUSG00000030222	1.99016	15.3752		XLOC_025980	Nmi	NA	64.1592	9.63411		XLOC_029360	RP23-423J10.4	NA	0	1.17512
XLOC_040130	Nlrp4b	NA	0	0.571611		XLOC_025981	Neb	ENSMUSG00000026950	0.0271	0.925607		XLOC_029373	Qrfpr	ENSMUSG00000058400	0	2.30294
XLOC_040220	Obox1,Obox2	NA	0	7.58608		XLOC_026058	Grb14	NA	3.27249	60.4077		XLOC_029376	RP24-363L5.1	NA	0	1.17259
XLOC_040230	Obox5	NA	0	2.46312		XLOC_026059	Cobll1	NA	1.63656	8.37122		XLOC_029463	1700018B24Rik	NA	0	1.8264
XLOC_040254	Slc1a5	NA	171.72	55.9929		XLOC_026085	Abcb11	ENSMUSG00000027048	0	0.896673		XLOC_029485	Mgarp	ENSMUSG00000037161	0.189895	122.19
XLOC_040279	Psg22	NA	0	0.620247		XLOC_026086	Lrp2	NA	11.1923	0.138133		XLOC_029539	WI1-49P9.2	NA	59.0979	11.7505
XLOC_040331	Nlrp9b	NA	0	2.35543		XLOC_026096	Gm26558	NA	1.83484	0		XLOC_029592	Gm5709	NA	0	0.621498
XLOC_040360	Nlrp4e	NA	0	1.19739		XLOC_026426	Olfr1250	ENSMUSG00000075078	0	1.58891		XLOC_029689	Sptssb	ENSMUSG00000043461	0	1.49633
XLOC_040361	Nlrp5	NA	0.021413	6.5222		XLOC_026473	Mdk	NA	763.223	105.705		XLOC_029706	Slitrk3	NA	8.74762	0.410118
XLOC_040404	Ceacam10	NA	6.08758	44.6859		XLOC_026497	Accsl	NA	0	2.80485		XLOC_029738	Rxfp1	NA	91.0824	6.21961
XLOC_040447	Nlrp4a	NA	0	1.29142		XLOC_026534	Gm13868	NA	1.45522	0		XLOC_029758	Tdo2	NA	0.494532	315.054
XLOC_040449	Nlrp9a	NA	0	1.23016		XLOC_026543	A930006I01Rik	NA	0	1.38554		XLOC_029767	Lrat	NA	1.19052	8.25675
XLOC_040569	2200002J24Rik	ENSMUSG00000013083	0	2.81343		XLOC_026545	BC016548	NA	0	1.09247		XLOC_029787	Gm38041	NA	0.637241	0
XLOC_040571	Atp4a	NA	0	1.28052		XLOC_026559	D430041D05Rik	NA	0.847215	0.0694368		XLOC_029838	Sema4a	NA	53.616	9.25939
XLOC_040572	Sbsn	NA	92.7848	369.927		XLOC_026568	Depdc7	ENSMUSG00000027173	0.44125	12.2717		XLOC_029846	Rab25	NA	107.188	6.48507
XLOC_040581	Dmkn	NA	55.5123	465.757		XLOC_026590	BB218582	NA	0	1.44791		XLOC_029861	Fdps,RP24-394C15.7,Rusc1	NA	137.181	561.455
XLOC_040582	Krtdap	NA	663.979	2600.61		XLOC_026657	Grem1	NA	0	6.0146		XLOC_029864	Hcn3	ENSMUSG00000028051	0.166713	6.39906
XLOC_040584	Gm29440	NA	0	1.66514		XLOC_026658	Scg5	ENSMUSG00000023236	0	0.624601		XLOC_030025	Bnipl,Gm128	NA	10.8152	1.64688
XLOC_040832	Aspdh	NA	0	0.510419		XLOC_026696	Ankrd63	NA	0	1.76511		XLOC_030080	Lix1l	NA	0	0.963262
XLOC_040838	Napsa	NA	117.287	20.5176		XLOC_026758	Frmd5	ENSMUSG00000027238	0.351056	9.889		XLOC_030104	Phgdh	ENSMUSG00000053398	8.26436	39.458
XLOC_040839	Kcnc3	ENSMUSG00000062785	7.47289	1.66557		XLOC_026795	Hdc	NA	371.991	35.7447		XLOC_030121	Hsd3b6	NA	0	21.0862
XLOC_040899	Saa2	ENSMUSG00000057465	0	1.8206		XLOC_026810	Gm22613	NA	0	0.477901		XLOC_030126	Hao2	ENSMUSG00000027870	0	34.8928
XLOC_040902	Ldhc	NA	0	0.519713		XLOC_026849	Gm14040	NA	3.81689	0		XLOC_030156	Gm10355	NA	0	3.5239
XLOC_040906	Tmem86a	ENSMUSG00000010307	24.7275	124.799		XLOC_026887	5330413P13Rik,Gm14282	NA	0	0.528758		XLOC_030164	Mab21l3	NA	17.1338	0.443918
XLOC_040950	Oca2	ENSMUSG00000030450	0	0.531231		XLOC_026908	Gm14038	NA	0	2.86384		XLOC_030243	Chil4	ENSMUSG00000063779	0.727831	0
XLOC_041042	Fam174b	ENSMUSG00000078670	17.007	4.61458		XLOC_026945	Banf2os	NA	0	0.49109		XLOC_030275	Gstm6	ENSMUSG00000068762	0.921972	10.8921
XLOC_041206	Tenm4	NA	1.05858	17.6218		XLOC_026949	Gm5535	NA	0	1.60557		XLOC_030295	Celsr2	ENSMUSG00000068740	19.0758	2.25094
XLOC_041219	Kctd14	NA	7.07691	36.3189		XLOC_026998	Cst11	NA	0	1.11842		XLOC_030306	Fndc7	ENSMUSG00000045326	0.90906	6.44413
XLOC_041431	Nlrp14	NA	0	14.7985		XLOC_027010	Gm14133	NA	2.25848	0		XLOC_030431	Usp53	NA	1.90177	25.5073
XLOC_041463	AC124457.1,Gm24888	NA	21.3379	0		XLOC_027086	Defb19	NA	0	8.32282		XLOC_030436	Synpo2	ENSMUSG00000050315	83.2939	17.2065
XLOC_041509	Insc	NA	0.194881	2.14538		XLOC_027103	Nol4l	NA	2.35651	15.1345		XLOC_030514	Hadh	NA	27.0832	91.5664
XLOC_041595	Slc5a11	NA	47.9591	3.61591		XLOC_027237	Jph2	NA	31.2139	5.31276		XLOC_030610	Bmpr1b	NA	0.311386	4.51999
XLOC_041622	Sbk1	ENSMUSG00000042978	5.64409	18.5477		XLOC_027247	Rims4	NA	0	9.10881		XLOC_030641	Clca1	ENSMUSG00000028255	51.2598	0.0728564
XLOC_041734	Gm15677	NA	1.21824	0		XLOC_027258	Slpi	ENSMUSG00000017002	63.3095	3.11458		XLOC_030652	Wdr63	ENSMUSG00000043020	0	3.9389
XLOC_041776	Dpysl4	ENSMUSG00000025478	2.23156	24.079		XLOC_027265	Spint3	NA	2.01619	0		XLOC_030662	4930503B20Rik,Samd13	NA	2.43133	0.107405
XLOC_041784	Kndc1	NA	0.106301	2.79872		XLOC_027292	Slc13a3	NA	1.21863	0		XLOC_030681	Ifi44	NA	18.4738	4.04258
XLOC_041816	Ifitm2	ENSMUSG00000060591	1.65323	0		XLOC_027353	Nfatc2	NA	4.45817	0.523128		XLOC_030686	Ptgfr	NA	0.917293	57.6601
XLOC_041817	Ifitm1	ENSMUSG00000025491	774.884	229.199		XLOC_027398	Zbp1	ENSMUSG00000027514	308.276	1.50328		XLOC_030720	Lhx8	ENSMUSG00000096225	0	0.910109
XLOC_041864	Lsp1	ENSMUSG00000018819	203.494	60.7396		XLOC_027420	Gm14617	NA	1.04556	0		XLOC_030773	Gm37689	NA	0	1.00498
XLOC_041891	Dhcr7	NA	15.5012	171.574		XLOC_027426	Gm14399	NA	0	0.804674		XLOC_030978	Cga	NA	0	0.878318
XLOC_041944	Dnaaf3,Tnni3	NA	7.54945	42.3819		XLOC_027450	Gm14421	NA	0	0.60295		XLOC_031090	Glipr2	NA	41.4849	10.459
XLOC_041959	Sbk2	ENSMUSG00000030433	0	1.13335		XLOC_027489	Hrh3	NA	0	1.01623		XLOC_031132	Galnt12	ENSMUSG00000039774	33.4685	1.58956
XLOC_041966	Rfpl4	ENSMUSG00000035191	0	4.24486		XLOC_027550	Gm8797	NA	162.327	4.40889		XLOC_031276	Bspry	ENSMUSG00000028392	53.6282	5.40444
XLOC_041972	Nlrp2	NA	0	0.623377		XLOC_027733	Kcnmb2	NA	0	0.835593		XLOC_031279	Rgs3	ENSMUSG00000059810	115.787	18.5294
XLOC_042298	Cblc	ENSMUSG00000040525	12.5792	2.45969		XLOC_027758	Gm27403,Gm27611,Mir1897,RP23-423J10.7,Sox2ot	NA	0.747732	0.117859		XLOC_031335	Gm11240	NA	0.659408	0
XLOC_042417	Atp1a3	NA	1.43206	40.445		XLOC_027912	Stoml3	ENSMUSG00000027744	0	1.48615		XLOC_031393	Sh3gl2	NA	9.7807	0.918597
XLOC_042429	Cxcl17	NA	53.434	11.9556		XLOC_028055	1110032F04Rik	NA	0	2.30353		XLOC_031520	Ror1	NA	0.321669	7.12739
XLOC_042443	Nlrp9c	NA	0	2.55981		XLOC_028119	RP23-187I18.1	NA	0	1.48129		XLOC_031562	C8b	ENSMUSG00000029656	0	0.586421
XLOC_042574	Fxyd3	NA	659.588	99.7638		XLOC_028128	Map9	ENSMUSG00000033900	0.143433	1.54839		XLOC_031564	1700024P16Rik	NA	8.68975	1.26808
XLOC_042670	Zfp536	NA	0.0942446	0.711088		XLOC_028196	AW047730	NA	0	0.48949		XLOC_031590	Glis1	NA	0.0932636	15.1381
XLOC_042780	Myh14	NA	12.8054	4.06927		XLOC_028197	Gm3764	NA	0.590738	0		XLOC_031600	Slc1a7	ENSMUSG00000008932	0	0.62845
XLOC_042850	Saa1	ENSMUSG00000074115	0.849922	0		XLOC_028206	RP24-298F19.6	NA	4.80988	0		XLOC_031619	Calr4	NA	0	0.767265
XLOC_042857	Ptpn5	NA	0.915289	0.121882		XLOC_028226	Pklr	ENSMUSG00000041237	0	1.0658		XLOC_031649	Trabd2b	NA	8.22698	2.09882
XLOC_043202	Mef2a	NA	45.7115	19.6436		XLOC_028233	Muc1	NA	113.346	4.0674		XLOC_031729	2610528J11Rik	NA	39.3654	3.83017
XLOC_043209	4833412C05Rik	NA	0.684874	0		XLOC_028292	S100a5	ENSMUSG00000001023	0	1.68611		XLOC_031744	Slc2a1	ENSMUSG00000028645	27.5783	148.697
XLOC_043246	Rpl17-ps10	NA	0	4.24862		XLOC_028317	Sprr2f	NA	447.199	9.57567		XLOC_031757	Guca2a	ENSMUSG00000023247	0	1.07788
XLOC_043271	Slco3a1	NA	3.10798	9.52481		XLOC_028319	Sprr2h	NA	0	6.10451		XLOC_031857	Col8a2	NA	1.46453	8.31977
XLOC_043275	Sv2b	ENSMUSG00000053025	5.8963	1.32805		XLOC_028351	Tchhl1	ENSMUSG00000027908	0	0.372797		XLOC_031872	Gm12941	NA	0	0.660624
XLOC_043282	AU020206	NA	21.6927	166.096		XLOC_028380	Tdrkh	NA	0	1.09216		XLOC_031888	Csmd2	NA	3.69196	0.00993189
XLOC_043359	Cemip	NA	1.54614	9.23501		XLOC_028397	4930481B07Rik	NA	0	1.21136		XLOC_031919	Marcksl1	NA	39.7532	190.127
XLOC_043413	Tmem135	NA	8.6187	22.8459		XLOC_028417	Ctss	ENSMUSG00000038642	264.951	8.0188		XLOC_031926	Spocd1	NA	0	5.10911
XLOC_043460	Myo7a	NA	0.576155	18.5563		XLOC_028456	Hist2h2be	NA	0.821644	16.6123		XLOC_031942	Laptm5	ENSMUSG00000028581	46.6296	7.7527
XLOC_043486	Snord15a	NA	3.85531	0		XLOC_028615	RP24-500I24.7	NA	2.19725	0		XLOC_031998	Slc30a2	NA	0.21854	20.0284
XLOC_043523	Folr1	ENSMUSG00000001827	1.95109	33.8735		XLOC_028717	Dbt	NA	1.09793	10.9525		XLOC_032002	Paqr7	ENSMUSG00000037348	0.838002	9.97073
XLOC_043643	Hpx	ENSMUSG00000030895	11.6063	1.84146		XLOC_028720	Sass6	NA	0	2.95071		XLOC_032029	Id3	NA	20.6797	194.798
XLOC_043744	Lyve1	ENSMUSG00000030787	1.82404	10.3066		XLOC_028853	RP23-246L14.3	NA	0	0.782124		XLOC_032048	Wnt4	NA	2.05037	39.7069
XLOC_043745	Mrvi1	ENSMUSG00000005611	20.1755	8.66082		XLOC_028871	RP23-292C19.1	NA	0	3.97513		XLOC_032090	Aldh4a1,Gm21969,Iffo2,Tas1r2	ENSMUSG00000028737;ENSMUSG00000094439;ENSMUSG00000041025;ENSMUSG00000028738	9.32602	35.4743
XLOC_043828	Dnah3	ENSMUSG00000052273	0.0421626	1.10669		XLOC_028888	Cxxc4	ENSMUSG00000044365	0	2.87359		XLOC_032105	Padi2	NA	324.948	32.7458
XLOC_043829	Zp2	ENSMUSG00000030911	0	15.9102		XLOC_028942	Adh6b,Gm23467	NA	0	1.47496		XLOC_032106	Gm26226	NA	249.609	0
XLOC_043910	Zg16	ENSMUSG00000049350	0	1.12461		XLOC_028960	Gbp5	NA	36.2956	1.08936		XLOC_032111	Spata21	NA	0	0.827173
XLOC_043979	Pstk	NA	0.659509	3.46662		XLOC_028962	Gbp7	NA	13.224	1.91239		XLOC_032122	Hspb7	ENSMUSG00000006221	43.3122	4.55722
XLOC_044000	D7Ertd443e	ENSMUSG00000030994	0.0325511	1.03907		XLOC_028963	Gbp3	NA	125.385	4.11007		XLOC_032136	4930455G09Rik	NA	1.22076	0
XLOC_044023	Cfap46	NA	0.343486	4.57798		XLOC_028964	Gbp2b	NA	163.82	0.419426		XLOC_032160	Gm13023	NA	0	3.7411
XLOC_044027	Adam8	NA	4.95204	23.891		XLOC_028965	Gbp2	NA	482.237	5.52388		XLOC_032168	Oog2	NA	0	1.24776
XLOC_044064	Cdhr5	ENSMUSG00000025497	1.35028	9.26721		XLOC_029089	Lrriq3	NA	0	0.572204		XLOC_032423	Mos	ENSMUSG00000078365	0	3.50912
XLOC_044227	F10	NA	0.055601	1.22504		XLOC_029218	Gm9733	NA	3.8559	0		XLOC_032429	Penk	NA	15.6335	99.4624
XLOC_044426	Star	NA	2.01633	378.618		XLOC_029219	Sirpb1a	NA	6.88078	0		XLOC_032609	Pm20d2	ENSMUSG00000054659	0.156842	2.29714
XLOC_044542	Actg-ps1	NA	2.66668	0		XLOC_029221	Sirpb1c	NA	1.41009	0		XLOC_032625	1700003M02Rik	NA	0.0287853	3.62953
XLOC_044549	Enpp6	NA	0.0945286	3.02216		XLOC_029224	Gm5150	NA	8.40899	0		XLOC_032638	Gm12366	NA	349.625	63.4602
XLOC_044647	Lpl	NA	2.02035	6.67233		XLOC_029291	Ect2	NA	0.255773	11.7063		XLOC_032688	1110017D15Rik	NA	0	11.0458
XLOC_044687	Pde4c	NA	14.1218	1.78443		XLOC_029305	Gm6505	NA	0	1.39376		XLOC_032702	Gm13305	NA	0.917414	31.3087
XLOC_044776	Ttc29	NA	0	1.5212		XLOC_029309	Gm1527	ENSMUSG00000074655	0	1.22711		XLOC_032784	Gm12426	NA	0	0.869109
XLOC_044794	Rnf150	ENSMUSG00000047747	4.98518	1.08846		XLOC_029360	RP23-423J10.4	NA	0	1.12902		XLOC_032822	Abca1	NA	6.21773	25.8965
XLOC_044837	Klf1	ENSMUSG00000054191	0	0.685934		XLOC_029373	Qrfpr	ENSMUSG00000058400	0	2.21315		XLOC_032841	Klf4	NA	78.6012	7.99036
XLOC_044878	Gm2694	NA	0	1.50603		XLOC_029376	RP24-363L5.1	NA	0	1.12709		XLOC_032843	2310081O03Rik	NA	2.84275	0
XLOC_044932	Slc6a2	ENSMUSG00000055368	29.4933	9.72074		XLOC_029418	Gm9845	ENSMUSG00000050533	1.05699	0		XLOC_032853	Gm26144	NA	1.22423	0
XLOC_044937	Mt4	ENSMUSG00000031757	12.8368	181.169		XLOC_029449	2610316D01Rik	NA	0	0.624727		XLOC_032864	Epb4.1l4b	NA	43.1603	12.0872
XLOC_044958	Ccl17	ENSMUSG00000031780	0	4.92901		XLOC_029463	1700018B24Rik	NA	0	1.75531		XLOC_032990	Ptprd	NA	1.76885	6.02426
XLOC_044965	Drc7	ENSMUSG00000031786	0	1.4394		XLOC_029485	Mgarp	ENSMUSG00000037161	0	117.469		XLOC_033010	Frem1	ENSMUSG00000059049	0.459232	14.7724
XLOC_044979	Ccdc113	ENSMUSG00000036598	0	2.54888		XLOC_029510	Gm30292	NA	0	0.364485		XLOC_033053	C87499	NA	0	1.34191
XLOC_045010	Cmtm1	NA	0	2.20983		XLOC_029592	Gm5709	NA	0	0.597425		XLOC_033086	Elavl2	NA	0.0779898	1.21304
XLOC_045015	Cmtm2b	ENSMUSG00000035785	0	0.676686		XLOC_029636	Ssr3	ENSMUSG00000027828	23.7918	161.16		XLOC_033103	Gm12648	NA	0	4.23135
XLOC_045025	Ces2a	NA	0	9.7164		XLOC_029686	B3galnt1	NA	4.97339	40.8369		XLOC_033118	Gm830	NA	0	0.813776
XLOC_045027	Ces2b	NA	15.7085	2.75714		XLOC_029758	Tdo2	NA	2.84614	302.853		XLOC_033129	Cyp2j11	NA	0	0.708848
XLOC_045056	Hsd11b2	ENSMUSG00000031891	187.832	35.5723		XLOC_029766	Rbm46	ENSMUSG00000033882	0	0.538255		XLOC_033137	Gm12695	ENSMUSG00000078639	0	0.614025
XLOC_045062	Agrp	NA	0.580784	0		XLOC_029822	Hapln2	NA	0	0.962779		XLOC_033186	C130073F10Rik	NA	0	0.90126
XLOC_045068	Tsnaxip1	ENSMUSG00000031893	0	3.00848		XLOC_029838	Sema4a	NA	59.3794	8.9045		XLOC_033219	Acot11	NA	6.31677	28.279
XLOC_045090	Cdh1	NA	17.6122	7.53524		XLOC_029846	Rab25	NA	72.0948	6.23325		XLOC_033244	Zyg11a	NA	0	0.647425
XLOC_045112	Zfhx3	ENSMUSG00000038872	3.83487	1.35245		XLOC_029861	Fdps,RP24-394C15.7,Rusc1	NA	61.2958	539.741		XLOC_033318	Tex38	NA	0	1.079
XLOC_045168	Bco1	NA	0.263643	6.2251		XLOC_029864	Hcn3	ENSMUSG00000028051	0	6.15158		XLOC_033328	Tspan1	NA	205.957	2.46988
XLOC_045187	Adad2	ENSMUSG00000024266	0	0.569895		XLOC_029952	Crct1	NA	0	5.57602		XLOC_033357	Klf17	ENSMUSG00000048626	0	0.621845
XLOC_045192	Wfdc1	ENSMUSG00000023336	58.563	23.5865		XLOC_030061	Hist2h4	ENSMUSG00000091405	0	0.802688		XLOC_033397	Ermap	NA	0.0278285	0.63013
XLOC_045224	Kcnk1	ENSMUSG00000033998	30.7429	11.4294		XLOC_030063	Fcgr1	ENSMUSG00000015947	29.4034	0.899451		XLOC_033459	Bmp8a	ENSMUSG00000032726	1.6367	10.1093
XLOC_045567	Cyp4v3,Klkb1	ENSMUSG00000079057;ENSMUSG00000031640	14.5212	5.10387		XLOC_030080	Lix1l	NA	0	0.926224		XLOC_033494	2610028E06Rik	NA	0	1.12331
XLOC_045602	Tenm3	NA	5.85725	1.6703		XLOC_030121	Hsd3b6	NA	0	20.2707		XLOC_033513	Tfap2e	NA	0	1.39178
XLOC_045614	Wdr17	NA	1.16907	0.0706726		XLOC_030125	Hsd3b1	NA	0	1545.27		XLOC_033542	Hpca	ENSMUSG00000028785	0	0.582431
XLOC_045651	Tll1	ENSMUSG00000053626	3.94059	0.537424		XLOC_030126	Hao2	ENSMUSG00000027870	0	33.5422		XLOC_033576	Serinc2	ENSMUSG00000023232	69.9543	4.95502
XLOC_045653	Cpe	ENSMUSG00000037852	63.4939	149.996		XLOC_030160	RP23-103P11.2	NA	0	0.681805		XLOC_033638	Sfn	NA	104.999	1.61453
XLOC_045654	Msmo1	NA	22.9513	148.92		XLOC_030164	Mab21l3	NA	44.6702	0.426665		XLOC_033737	Cda	NA	7.65576	75.7338
XLOC_045658	Trim75	ENSMUSG00000071089	0	0.863224		XLOC_030237	Pifo	ENSMUSG00000010136	0	7.69041		XLOC_033741	Ubxn10	ENSMUSG00000043621	0.085692	1.3939
XLOC_045687	Gm10311	ENSMUSG00000071083	0	1.47641		XLOC_030278	Gstm2	NA	1621.67	195.274		XLOC_033746	Pla2g5	NA	0.397568	19.1714
XLOC_045928	Cbln1	ENSMUSG00000031654	0	6.70233		XLOC_030280	Gstm1	NA	1410.15	142.217		XLOC_033779	Padi4	NA	29.3379	0.494112
XLOC_045954	Irx3	ENSMUSG00000031734	0.589614	5.91226		XLOC_030298	5330417C22Rik	ENSMUSG00000040412	1.32365	14.9948		XLOC_033781	Padi1	NA	556.656	7.5209
XLOC_045968	Ces1f	NA	0	4.77667		XLOC_030306	Fndc7	ENSMUSG00000045326	0.212805	6.19593		XLOC_033797	Slc25a34	NA	0	2.64687
XLOC_046006	Gm15681	NA	0	0.574116		XLOC_030348	Vcam1	ENSMUSG00000027962	13.7539	1.87876		XLOC_033804	Fhad1	ENSMUSG00000051435	0.105328	2.71234
XLOC_046011	Cdh11	ENSMUSG00000031673	97.2217	36.6137		XLOC_030431	Usp53	NA	1.33777	24.5191		XLOC_033814	Pdpn	NA	1.05007	21.356
XLOC_046023	Cmtm1,Cmtm2a	NA	0	3.37301		XLOC_030432	Myoz2	ENSMUSG00000028116	0	1.63435		XLOC_033815	Oog4	NA	0	1.44719
XLOC_046084	Tmed6	ENSMUSG00000031919	24.1317	4.14915		XLOC_030610	Bmpr1b	NA	0.514468	4.34547		XLOC_033825	Gm13084	NA	0	3.43209
XLOC_046101	Hp	ENSMUSG00000031722	51.6985	16.6866		XLOC_030652	Wdr63	ENSMUSG00000043020	0	3.78451		XLOC_033834	Oog3	NA	0	3.80676
XLOC_046131	Fa2h	NA	0.179302	1.76323		XLOC_030682	Ifi44l	NA	37.6805	2.8911		XLOC_033835	C87977	NA	0	5.10931
XLOC_046192	Slc38a8	ENSMUSG00000034224	20.651	2.92169		XLOC_030686	Ptgfr	NA	1.26694	55.4302		XLOC_033984	Ajap1	NA	0.939296	0
XLOC_046208	Pgbd5	ENSMUSG00000050751	1.74704	13.2523		XLOC_030694	Fam73a	NA	431.706	35.9298		XLOC_033993	Trp73	NA	0.0330883	0.504425
XLOC_046209	Agt	ENSMUSG00000031980	0.331246	9.60133		XLOC_030720	Lhx8	ENSMUSG00000096225	0	0.874975		XLOC_033996	Arhgef16	NA	16.7421	1.78485
XLOC_046222	Pcnxl2	NA	0.144097	1.48249		XLOC_030761	Gm11807	NA	3.7018	0		XLOC_034006	Tnfrsf14	NA	4.26029	0.291443
XLOC_046234	Gm26397	NA	10.2896	0		XLOC_030773	Gm37689	NA	0	0.966209		XLOC_034020	Slc35e2	NA	0.961255	0
XLOC_046276	Casp4	ENSMUSG00000033538	27.1701	4.46261		XLOC_030859	Calb1	ENSMUSG00000028222	31.47	4.43081		XLOC_034105	Abcb1b	ENSMUSG00000028970	11.4584	100.991
XLOC_046297	Mmp7	NA	82.638	23.0592		XLOC_030895	Pnisr	NA	7.57889	46.9924		XLOC_034108	RP23-338P12.3	NA	0	5.43234
XLOC_046353	Gm24455	NA	33.8957	0		XLOC_030958	Gabrr2	NA	0	0.577965		XLOC_034114	9330182L06Rik	NA	3.05723	0.373573
XLOC_046441	Ldlr	ENSMUSG00000032193	9.72176	36.5356		XLOC_030978	Cga	NA	0	0.844392		XLOC_034153	Sema3d	NA	0.158553	4.08491
XLOC_046447	Cnn1	ENSMUSG00000001349	129.006	54.2507		XLOC_031011	Chmp5	NA	8.92693	54.5397		XLOC_034157	Sema3a	ENSMUSG00000028883	10.7254	1.28151
XLOC_046506	Gm27164	NA	0	0.729074		XLOC_031017	Gm12401	NA	0	0.589831		XLOC_034265	Asic3	ENSMUSG00000038276	0.159155	3.35619
XLOC_046633	2610203C20Rik	NA	28.7985	10.7798		XLOC_031090	Glipr2	NA	57.2117	10.0568		XLOC_034291	RP23-56M18.5	NA	0	1.35661
XLOC_046662	Ccdc153	ENSMUSG00000070306	0	17.5367		XLOC_031120	E230008N13Rik	NA	0	3.2041		XLOC_034292	RP23-56M18.8	NA	0	0.632302
XLOC_046690	Scn2b	ENSMUSG00000070304	12.815	1.52513		XLOC_031175	Smc2	NA	1.34347	15.2098		XLOC_034294	Gm5067	NA	0	2.35979
XLOC_046691	Scn4b	ENSMUSG00000046480	3.33935	0.346079		XLOC_031276	Bspry	ENSMUSG00000028392	41.183	5.19581		XLOC_034296	RP24-162F23.9	NA	0	3.79842
XLOC_046704	Apoa1	NA	0	15.8275		XLOC_031490	Fggy	NA	0	5.62169		XLOC_034298	Gm10471	ENSMUSG00000073116	0	0.987382
XLOC_046705	Apoa4	ENSMUSG00000032080	0	9.75447		XLOC_031501	L1td1	NA	0	0.59785		XLOC_034306	Gm7361	ENSMUSG00000059645	0	1.80258
XLOC_046737	Cryab	ENSMUSG00000032060	186.456	605.298		XLOC_031540	Gm12791	NA	0	1.26657		XLOC_034309	Dpp6	NA	14.803	0.827538
XLOC_046741	Btg4	ENSMUSG00000032056	0	2.62777		XLOC_031562	C8b	ENSMUSG00000029656	0	0.563935		XLOC_034342	Drc1	NA	0.15882	2.79832
XLOC_046828	Cyp11a1	NA	55.8114	1671.37		XLOC_031574	Dhcr24	ENSMUSG00000034926	4.57554	26.0533		XLOC_034344	1700001C02Rik	NA	0	6.27056
XLOC_046842	Hcn4	ENSMUSG00000032338	2.36345	10.8387		XLOC_031585	Ldlrad1	NA	0	3.13632		XLOC_034346	Kcnk3	NA	1.09378	29.5964
XLOC_046855	Gramd2	NA	0.240263	1.80935		XLOC_031595	Lrp8	NA	0.560198	3.55545		XLOC_034421	Fgfr3	NA	0.789347	8.81743
XLOC_046890	Scarletltr	NA	4.37342	0		XLOC_031600	Slc1a7	ENSMUSG00000008932	0	0.604159		XLOC_034453	Hgfac	ENSMUSG00000029102	69.3075	0.855768
XLOC_046935	Car12	NA	56.58	9.88624		XLOC_031619	Calr4	NA	0	0.737461		XLOC_034464	Ablim2	NA	0.382363	2.15188
XLOC_046943	Vps13c	ENSMUSG00000035284	10.9809	4.01947		XLOC_031657	Pdzk1ip1	ENSMUSG00000028716	207.494	15.6479		XLOC_034474	Jakmip1	ENSMUSG00000063646	4.7554	0.480534
XLOC_047009	Rab27a	NA	4.96569	32.9642		XLOC_031661	Cyp4a12a	NA	0.976124	0		XLOC_034491	Otop1	NA	1.09964	0
XLOC_047026	Bcl2l10	ENSMUSG00000032191	0	10.9129		XLOC_031678	Gm12854	NA	0	3.77075		XLOC_034525	Gm7879	ENSMUSG00000033036	0	4.55178
XLOC_047049	Elovl5	NA	61.1465	148.026		XLOC_031695	Gm12996	NA	1.37369	0		XLOC_034531	RP24-230J14.4	NA	735.427	178.248
XLOC_047056	Omt2b	ENSMUSG00000038750	0	5.90981		XLOC_031744	Slc2a1	ENSMUSG00000028645	26.0704	142.94		XLOC_034676	0610040J01Rik	ENSMUSG00000060512	19.6105	2.38037
XLOC_047119	Prss35	NA	7.58621	53.2447		XLOC_031763	Edn2	NA	0	0.860534		XLOC_034719	Uchl1	NA	2.77842	43.4765
XLOC_047314	Slco2a1	ENSMUSG00000032548	4.93172	13.2047		XLOC_031770	Cited4	NA	492.429	27.3781		XLOC_034743	Nipal1	NA	0.983115	7.96801
XLOC_047381	Cish	NA	4.13275	18.6803		XLOC_031772	Rims3	ENSMUSG00000032890	26.8812	0.347337		XLOC_034751	Spata18	ENSMUSG00000029155	0	1.14353
XLOC_047467	Scap	NA	20.0573	63.183		XLOC_031795	Mycl	ENSMUSG00000028654	0.531821	12.498		XLOC_034765	Kit	NA	2.97652	14.1634
XLOC_047636	Nlrp4g	ENSMUSG00000079741	0	0.831143		XLOC_031846	Grik3	NA	0	1.30156		XLOC_034779	C530008M17Rik	NA	0.241387	2.20017
XLOC_047714	Hephl1	ENSMUSG00000031936	0.192042	2.54966		XLOC_031848	Csf3r	NA	10.2122	0.531971		XLOC_034859	5830473C10Rik	ENSMUSG00000070690	0	2.22371
XLOC_047731	Muc16	ENSMUSG00000032134	0	0.553689		XLOC_031872	Gm12941	NA	0	0.635081		XLOC_034873	Parm1	ENSMUSG00000034981	5.77314	26.1038
XLOC_047811	Rab3d	ENSMUSG00000019066	11.671	3.84865		XLOC_031901	Fndc5	NA	54.0411	5.99579		XLOC_034886	Fam47e	NA	0.18741	5.08908
XLOC_047862	St14	NA	37.4761	9.33532		XLOC_031926	Spocd1	NA	0	4.91309		XLOC_034904	AA792892	ENSMUSG00000073497	0	0.551413
XLOC_047883	St3gal4	ENSMUSG00000032038	20.6414	76.5854		XLOC_031931	Col16a1	ENSMUSG00000040690	214.453	27.8224		XLOC_034929	RP24-142B15.2	NA	0	2.43848
XLOC_047922	Slc37a2	NA	1.23488	6.86653		XLOC_031942	Laptm5	ENSMUSG00000028581	84.0926	7.45322		XLOC_034948	1700007G11Rik	ENSMUSG00000057816	0	1.54717
XLOC_047959	AW551984	ENSMUSG00000038112	8.73352	1.52077		XLOC_031980	Nr0b2	NA	0	0.630591		XLOC_035068	Gm22270	NA	0	46.5074
XLOC_047982	Sc5d	ENSMUSG00000032018	5.38492	77.7988		XLOC_031998	Slc30a2	NA	0.26242	19.2552		XLOC_035091	Vmn2r-ps21	NA	0	0.888507
XLOC_047986	Gm26272	NA	0	1.15006		XLOC_032048	Wnt4	NA	4.61306	38.1727		XLOC_035148	C130026L21Rik	NA	4.57181	0.027799
XLOC_048046	Tmprss4	NA	42.862	6.80008		XLOC_032111	Spata21	NA	0	0.795113		XLOC_035184	Dao	NA	1.14183	0
XLOC_048051	4833428L15Rik	NA	0	0.585737		XLOC_032136	4930455G09Rik	NA	10.8033	0		XLOC_035203	Oasl2	ENSMUSG00000029561	49.7676	10.2333
XLOC_048062	Apoc3	NA	0	2.27521		XLOC_032160	Gm13023	NA	0	3.59664		XLOC_035205	Oasl1	NA	21.2235	2.14744
XLOC_048065	Gm10680	NA	0	18.601		XLOC_032168	Oog2	NA	0	1.19947		XLOC_035220	Pla2g1b	NA	0	1.17389
XLOC_048084	Zbtb16	ENSMUSG00000066687	10.1858	3.72807		XLOC_032197	Gm13243	NA	214.041	0		XLOC_035224	Gm13840	NA	0	2.3361
XLOC_048116	4833427G06Rik	ENSMUSG00000032057	0	3.54342		XLOC_032236	C230088H06Rik	NA	0	7.92992		XLOC_035286	Oas1h	ENSMUSG00000001168	0	2.62848
XLOC_048122	Fdx1	ENSMUSG00000032051	51.2026	835.996		XLOC_032253	Fv1	NA	0	1.19689		XLOC_035287	Oas1d	NA	0	3.03158
XLOC_048140	Cyp19a1	ENSMUSG00000032274	0	4.63288		XLOC_032329	Acot7	NA	727.864	23.4214		XLOC_035357	Lrrc43	ENSMUSG00000063409	0	1.33218
XLOC_048144	Acsbg1	NA	2.24343	145.931		XLOC_032334	Chd5	ENSMUSG00000005045	0	1.27399		XLOC_035386	Dnah10	ENSMUSG00000038011	0.132234	1.66487
XLOC_048208	Nr2e3	NA	0	3.50191		XLOC_032423	Mos	ENSMUSG00000078365	0	3.37359		XLOC_035426	Adgrd1	ENSMUSG00000044017	2.75209	0.16088
XLOC_048221	Paqr5	ENSMUSG00000032278	8.68685	1.01633		XLOC_032428	Sdr16c6	NA	0.48202	0		XLOC_035436	Gm23245	NA	17.1252	0
XLOC_048252	Hacd3	ENSMUSG00000033629	39.8099	87.8342		XLOC_032466	Gm11815	NA	0	4.78543		XLOC_035439	Nupr1l	NA	0	3.18645
XLOC_048292	C2cd4a	ENSMUSG00000047990	52.6017	15.3423		XLOC_032533	Gm11851	NA	0	1.32157		XLOC_035479	Cldn3	NA	133.331	30.4261
XLOC_048392	Omt2a	NA	0	1.93774		XLOC_032609	Pm20d2	ENSMUSG00000054659	0	2.20876		XLOC_035614	Lfng	NA	1.99457	21.7956
XLOC_048395	Dppa5a	ENSMUSG00000060461	0	7.75732		XLOC_032625	1700003M02Rik	NA	0.257211	3.48893		XLOC_035621	Sdk1	NA	3.69168	0.704863
XLOC_048442	Fam46a	NA	16.075	6.82887		XLOC_032675	Aqp3	NA	0.868955	0		XLOC_035639	Fscn1	NA	34.6142	146
XLOC_048460	Me1	NA	22.779	280.633		XLOC_032688	1110017D15Rik	NA	0	10.6189		XLOC_035671	Nptx2	NA	30.9238	4.6042
XLOC_048498	Tmed3	ENSMUSG00000032353	197.585	86.965		XLOC_032707	Ccl21a	ENSMUSG00000094686	163.31	22.2921		XLOC_035754	Wdr95	ENSMUSG00000029658	0	2.10069
XLOC_048541	1190002N15Rik	ENSMUSG00000045414	5.17121	15.4133		XLOC_032719	Cd72	ENSMUSG00000028459	156.453	8.59544		XLOC_035761	Rxfp2	NA	10.5209	0.0809425
XLOC_048609	Cldn18	ENSMUSG00000032473	0	4.43662		XLOC_032748	Pax5	ENSMUSG00000014030	0.81209	0.0594614		XLOC_035787	Fzd1	NA	8.22669	50.1902
XLOC_048660	Acpp	NA	11.8658	2.22388		XLOC_032784	Gm12426	NA	0	0.835694		XLOC_035970	Kcnh2	NA	39.3564	7.81671
XLOC_048702	Mapkapk3	ENSMUSG00000032577	7.42754	23.5378		XLOC_032798	Baat	NA	0	0.49869		XLOC_036062	Slc30a3	ENSMUSG00000029151	0	1.39928
XLOC_048718	Slc38a3	ENSMUSG00000010064	0.200961	4.87298		XLOC_032935	Ambp	NA	0	1.31093		XLOC_036085	Spon2	ENSMUSG00000037379	71.1531	10.3676
XLOC_048760	Fbxw21	NA	0	3.2152		XLOC_032937	Kif12	NA	0	2.21921		XLOC_036145	Msx1	NA	58.4498	5.18105
XLOC_048761	Fbxw13	ENSMUSG00000049314	0	0.746978		XLOC_032938	Orm2	NA	3.01862	0		XLOC_036276	Sel1l3	ENSMUSG00000029189	26.264	3.33505
XLOC_048762	Fbxw20	NA	0	1.38581		XLOC_032950	Tnc	NA	5.51116	42.436		XLOC_036365	Atp8a1	ENSMUSG00000037685	53.8695	10.1354
XLOC_048763	Fbxw14	NA	0	3.64716		XLOC_032990	Ptprd	NA	0.846167	5.79105		XLOC_036392	Zar1	ENSMUSG00000063935	0	10.3313
XLOC_048768	Fbxw22	ENSMUSG00000070324	0	2.19378		XLOC_032993	Gm11261	NA	0	1.21822		XLOC_036444	Hopx	NA	10.1805	104.286
XLOC_048769	Fbxw16	NA	0	1.05315		XLOC_033053	C87499	NA	0	1.29033		XLOC_036446	Spink2	NA	0	3.89077
XLOC_048770	Fbxw19	NA	0	2.89003		XLOC_033078	Gm12606	NA	0.744744	0		XLOC_036479	Tmprss11g	NA	7.81553	0
XLOC_048771	RP24-187P11.4	NA	0	0.629983		XLOC_033079	Cdkn2a	NA	0	2.92		XLOC_036481	Tmprss11b	NA	1.15183	0
XLOC_048773	Fbxw15	NA	0	5.22486		XLOC_033086	Elavl2	NA	0	1.16646		XLOC_036534	Adamts3	NA	4.33163	16.1454
XLOC_048776	Fbxw25	NA	0	0.804244		XLOC_033103	Gm12648	NA	0	4.06827		XLOC_036579	C87414	NA	0	3.52851
XLOC_048777	Fbxw18	NA	0	5.09647		XLOC_033118	Gm830	NA	0	0.782277		XLOC_036604	Prkg2	NA	0.374157	22.6214
XLOC_048778	Fbxw26	ENSMUSG00000059547	0	2.5057		XLOC_033129	Cyp2j11	NA	0	0.681315		XLOC_036646	Mapk10	NA	0.08646	0.785927
XLOC_048779	RP23-357H5.5	NA	0	1.02237		XLOC_033137	Gm12695	ENSMUSG00000078639	0	0.590071		XLOC_036659	Hsd17b11	NA	241.542	26.4629
XLOC_048802	Tdgf1	NA	0	0.512023		XLOC_033186	C130073F10Rik	NA	0	0.866432		XLOC_036677	Gbp4,Gbp8,Gbp9	NA	91.3266	8.95667
XLOC_048911	Cdcp1	ENSMUSG00000035498	5.30074	1.59651		XLOC_033211	Pcsk9	NA	0	1.22559		XLOC_036680	Gbp10,Gbp6	ENSMUSG00000105096;ENSMUSG00000079362	25.7487	1.38051
XLOC_049012	Dgkk	NA	0.529167	3.06237		XLOC_033243	Echdc2	NA	0.0317002	8.8059		XLOC_036766	1010001B22Rik	NA	2.65401	0
XLOC_049042	Slc38a5	ENSMUSG00000031170	0.788733	10.4998		XLOC_033328	Tspan1	NA	71.0993	2.3752		XLOC_036803	Gm27357,Gm27627,Gm27882,Gm27998,Miat	NA	1.82009	0.13094
XLOC_049374	Rps2-ps13	NA	528.519	181.557		XLOC_033351	Kif2c	NA	1.05099	11.0237		XLOC_036804	Cryba4	NA	0	1.55527
XLOC_049530	Gpr50	NA	0.381903	3.70228		XLOC_033357	Klf17	ENSMUSG00000048626	0	0.597813		XLOC_036821	Sgsm1	NA	16.3446	1.99261
XLOC_049544	Nsdhl	ENSMUSG00000031349	13.997	43.1132		XLOC_033417	Guca2b	ENSMUSG00000032978	3.57551	92.9223		XLOC_036830	Tmem119	ENSMUSG00000054675	69.1445	11.3219
XLOC_049722	Arx	NA	0	6.02028		XLOC_033435	Zmpste24	ENSMUSG00000043207	104.349	22.0206		XLOC_036925	Oas2	NA	64.1267	10.2298
XLOC_049727	AU015836	ENSMUSG00000081044	0.0498724	3.21788		XLOC_033494	2610028E06Rik	NA	0	1.08005		XLOC_036926	Oas3	NA	7.18747	0.305354
XLOC_049775	Eda	NA	3.24315	0.798773		XLOC_033513	Tfap2e	NA	0	1.33792		XLOC_036927	Oas1e	ENSMUSG00000066867	0	6.43619
XLOC_049788	Gdpd2	NA	0.428358	11.5411		XLOC_033549	Zbtb8b	NA	0.311723	7.01987		XLOC_036930	Oas1a,Oas1g	ENSMUSG00000066861	53.0737	9.33367
XLOC_050090	Bex4	NA	0.709954	45.272		XLOC_033570	Adgrb2	NA	12.5969	0.0537189		XLOC_036991	Pitpnm2	ENSMUSG00000029406	6.64276	39.3983
XLOC_050138	E230019M04Rik	ENSMUSG00000042433	0	0.60068		XLOC_033576	Serinc2	ENSMUSG00000023232	73.8057	4.76358		XLOC_037005	RP23-363M4.1	NA	0	0.576933
XLOC_050167	Pak3	NA	0.157949	2.14737		XLOC_033618	Themis2	NA	34.133	0.970877		XLOC_037006	Scarb1	NA	29.9233	477.91
XLOC_050283	Gpr143	ENSMUSG00000025333	0	0.489677		XLOC_033654	Cd52	NA	438.402	25.6779		XLOC_037091	Limk1	NA	5.52646	50.2737
XLOC_050329	Smpx	NA	0	5.21832		XLOC_033711	C1qb	ENSMUSG00000036905	692.694	13.573		XLOC_037107	Fkbp6	ENSMUSG00000040013	0	1.2233
XLOC_050483	Porcn	NA	29.1236	7.44099		XLOC_033712	C1qc	ENSMUSG00000036896	477.654	11.0011		XLOC_037137	Sh2b2	ENSMUSG00000005057	1.11997	7.52995
XLOC_050727	Btg1-ps2	NA	0	0.850877		XLOC_033713	C1qa	ENSMUSG00000036887	849.994	14.7708		XLOC_037142	Col26a1	ENSMUSG00000004415	0.456584	4.66034
XLOC_050768	Gm14604	NA	0	1.10239		XLOC_033728	Alpl	NA	6.72334	139.435		XLOC_037165	Fbxo24,Pcolce	ENSMUSG00000089984;ENSMUSG00000029718	46.2667	307.354
XLOC_050786	Smarca1	NA	2.6684	9.33214		XLOC_033737	Cda	NA	7.27387	72.8031		XLOC_037176	Cyp3a13	NA	3.79717	0
XLOC_050816	Hs6st2	NA	0.324482	3.04308		XLOC_033746	Pla2g5	NA	1.54716	18.4343		XLOC_037232	Mmd2	NA	0.402295	6.53088
XLOC_050821	Gpc4	NA	11.3886	31.0982		XLOC_033778	Padi6	NA	0	19.8263		XLOC_037348	Zar1l	NA	0	1.53101
XLOC_050867	Arhgef6	ENSMUSG00000031133	10.216	31.1693		XLOC_033793	Gm694	ENSMUSG00000070637	5.84135	0		XLOC_037389	Dlx6	ENSMUSG00000029754	30.4295	2.29116
XLOC_050899	Sox3	ENSMUSG00000045179	0	2.67829		XLOC_033795	Fblim1	NA	73.7853	14.8946		XLOC_037394	Tac1	NA	0	1.07895
XLOC_051263	Cited1	NA	1.3634	68.9712		XLOC_033815	Oog4	NA	0	1.39116		XLOC_037437	Cftr	NA	6.52861	0.314629
XLOC_051358	Hmgn5	ENSMUSG00000031245	27.2207	65.5316		XLOC_033825	Gm13084	NA	0	3.29932		XLOC_037494	Ahcyl2	NA	42.2457	11.7962
XLOC_051468	Sytl4	ENSMUSG00000031255	1.85871	9.3327		XLOC_033834	Oog3	NA	0	3.65955		XLOC_037498	1700023L04Rik	NA	0	1.9212
XLOC_051570	Acsl4	NA	14.0799	35.6862		XLOC_033835	C87977	NA	0	4.91216		XLOC_037508	Cpa2	ENSMUSG00000071553	0	1.73372
XLOC_051582	Capn6	NA	1.63681	6.17817		XLOC_033840	Pramef12	ENSMUSG00000028591	0	1.49907		XLOC_037511	Cpa1	NA	0	3.94027
XLOC_051607	Il13ra2	NA	28.7637	6.04288		XLOC_033974	Gm27500	NA	2.43197	0		XLOC_037608	Wee2	NA	0	1.12019
XLOC_051754	S100g	ENSMUSG00000040808	2998.81	434.067		XLOC_033984	Ajap1	NA	3.27123	0		XLOC_037745	Atp6v0e2	ENSMUSG00000039347	6.55527	30.4954
XLOC_051790	Prps2	NA	16.3091	58.6963		XLOC_034006	Tnfrsf14	NA	7.46912	0.280264		XLOC_037763	Doxl2	NA	0	2.8378
						XLOC_034019	Slc35e2	NA	0	1.46443		XLOC_037790	Gm27477,Gm27861,Gm27867,Gm27868,Hotairm1	NA	0.0319463	1.80946
						XLOC_034031	Mxra8os	NA	0	0.784406		XLOC_037902	Gng12	NA	293.929	56.7767
						XLOC_034047	Isg15	ENSMUSG00000035692	147.951	22.1972		XLOC_037951	Igkv16-104	NA	0	4.2903
						XLOC_034058	Gm15772	NA	3744.83	478.797		XLOC_038043	Retsat	ENSMUSG00000056666	8.16526	37.7893
						XLOC_034071	Krit1	NA	1.51459	15.4243		XLOC_038104	Atp6v1b1	ENSMUSG00000006269	0	0.720896
						XLOC_034105	Abcb1b	ENSMUSG00000028970	6.08463	97.0692		XLOC_038118	Noto	NA	0	1.73485
						XLOC_034291	RP23-56M18.5	NA	0	1.30417		XLOC_038128	Add2	ENSMUSG00000030000	5.69469	0.244775
						XLOC_034292	RP23-56M18.8	NA	0	0.607835		XLOC_038149	D6Ertd527e	ENSMUSG00000090891	0	1.09742
						XLOC_034294	Gm5067	NA	0	2.26865		XLOC_038159	Gp9	ENSMUSG00000030054	0.792429	0
						XLOC_034296	RP24-162F23.9	NA	0	3.65142		XLOC_038210	Fbln2	NA	173.8	32.3561
						XLOC_034298	Gm10471	ENSMUSG00000073116	0	0.949016		XLOC_038211	Gm4575	NA	0.519452	0
						XLOC_034300	Gm10220	ENSMUSG00000067698	0	0.997441		XLOC_038216	Slc6a6	ENSMUSG00000030096	12.5964	61.7338
						XLOC_034317	Insig1	ENSMUSG00000045294	3.40901	41.2341		XLOC_038286	Lmcd1	ENSMUSG00000057604	4.5269	38.2581
						XLOC_034324	Rnf32	ENSMUSG00000029130	0.113336	3.05415		XLOC_038297	Cpne9	ENSMUSG00000030270	0	0.543916
						XLOC_034344	1700001C02Rik	NA	0	6.02732		XLOC_038319	Hrh1	ENSMUSG00000053004	3.23292	0.0824044
						XLOC_034346	Kcnk3	NA	1.49714	28.4518		XLOC_038334	H1foo	ENSMUSG00000042279	0	11.562
						XLOC_034363	Khk	ENSMUSG00000029162	74.2731	12.374		XLOC_038367	Cacna2d4	NA	0.653578	0
						XLOC_034396	Fosl2	ENSMUSG00000029135	9.31074	48.7043		XLOC_038373	Ninj2	NA	0	1.97789
						XLOC_034421	Fgfr3	NA	0.94014	8.47831		XLOC_038379	Cecr2	NA	0.0427967	0.873742
						XLOC_034458	Plk-ps1	NA	0	0.665863		XLOC_038380	Slc25a18	ENSMUSG00000004902	0	3.01666
						XLOC_034474	Jakmip1	ENSMUSG00000063646	4.05505	0.461935		XLOC_038389	Slc6a12	NA	0.408596	30.9618
						XLOC_034488	Stx18	NA	105.352	11.5838		XLOC_038391	A2m	ENSMUSG00000030111	2.71198	164.439
						XLOC_034719	Uchl1	NA	1.10758	41.7977		XLOC_038395	Mug2	ENSMUSG00000030131	0	0.540304
						XLOC_034751	Spata18	ENSMUSG00000029155	0	1.09881		XLOC_038397	Mug-ps1	NA	0	0.621795
						XLOC_034779	C530008M17Rik	NA	0.129204	2.11516		XLOC_038453	Pianp	NA	11.826	0.682643
						XLOC_034846	Dck	NA	1.21001	18.2245		XLOC_038512	Clec2f	NA	3.44474	0
						XLOC_034860	Cxcl5	ENSMUSG00000029371	1.12135	0		XLOC_038519	Gm27514	NA	0	2.00771
						XLOC_034873	Parm1	ENSMUSG00000034981	1.53576	25.0913		XLOC_038610	Pik3c2g	ENSMUSG00000030228	0.485775	186.283
						XLOC_034886	Fam47e	NA	0	4.89316		XLOC_038642	D6Ertd474e	NA	0	0.58625
						XLOC_034904	AA792892	ENSMUSG00000073497	0	0.530111		XLOC_038718	Samd9l	ENSMUSG00000047735	26.1284	5.44553
						XLOC_034926	Fras1	ENSMUSG00000034687	0.0173338	0.802258		XLOC_038751	Dlx5	NA	44.1615	3.75024
						XLOC_034929	RP24-142B15.2	NA	0	2.34416		XLOC_038806	Aass	NA	0.308697	11.4148
						XLOC_034948	1700007G11Rik	ENSMUSG00000057816	0	1.48704		XLOC_038843	Prrt4	NA	0	2.20456
						XLOC_035016	Spp1	NA	9.68782	66.6587		XLOC_038906	2010107G12Rik	ENSMUSG00000029847	11.5884	0.476421
						XLOC_035068	Gm22270	NA	143.997	44.7046		XLOC_038935	Parp12	NA	36.3642	8.62629
						XLOC_035091	Vmn2r-ps21	NA	0	0.854003		XLOC_038980	Trpv6	NA	69.596	11.498
						XLOC_035123	Lrcol1	NA	1.06286	0		XLOC_039002	Nobox	NA	0	2.86671
						XLOC_035179	Gm3511	NA	0	1.0066		XLOC_039155	Fam13a	ENSMUSG00000037709	1.1446	10.161
						XLOC_035203	Oasl2	ENSMUSG00000029561	179.089	9.83527		XLOC_039183	4930597O21Rik	ENSMUSG00000053442	1.9093	0
						XLOC_035205	Oasl1	NA	30.7576	2.06441		XLOC_039189	Tacstd2	NA	93.7013	23.322
						XLOC_035251	Tesc	NA	0	2.08969		XLOC_039266	Igkv5-45	NA	3.20132	0
						XLOC_035286	Oas1h	ENSMUSG00000001168	0	2.52637		XLOC_039297	Igkv8-19	NA	1.72812	0
						XLOC_035287	Oas1d	NA	0	2.91427		XLOC_039321	Atoh8	ENSMUSG00000037621	1.53335	112.534
						XLOC_035310	Myl2	NA	1.70074	0		XLOC_039346	Gm9008	ENSMUSG00000072476	0	1.00517
						XLOC_035312	RP24-347B12.1	NA	0	0.71659		XLOC_039347	Ctnna2	ENSMUSG00000063063	0.0348846	2.07954
						XLOC_035357	Lrrc43	ENSMUSG00000063409	0	1.28051		XLOC_039391	Actg2	ENSMUSG00000059430	1664.96	223.549
						XLOC_035386	Dnah10	ENSMUSG00000038011	0.0265945	1.60011		XLOC_039485	Gm839	NA	0	0.443719
						XLOC_035389	RP24-291G12.3	NA	0	2.40164		XLOC_039499	BC048671	ENSMUSG00000049694	3.36716	0
						XLOC_035408	Tmem132c	ENSMUSG00000034324	11.3124	0.382836		XLOC_039510	Wnt7a	ENSMUSG00000030093	9.15796	0.676962
						XLOC_035479	Cldn3	NA	1214.77	29.2361		XLOC_039514	Grip2	ENSMUSG00000030098	0.507157	14.4612
						XLOC_035500	Zp3	ENSMUSG00000004948	0	21.6381		XLOC_039536	Magi1	ENSMUSG00000045095	3.07933	12.6795
						XLOC_035511	Myl10	ENSMUSG00000005474	1.15809	0		XLOC_039537	Lrig1	ENSMUSG00000030029	30.2988	6.23063
						XLOC_035533	Epo	ENSMUSG00000029711	18.333	0		XLOC_039564	Prok2	ENSMUSG00000030069	0.619659	0
						XLOC_035600	Elfn1	NA	0	1.37631		XLOC_039579	Il5ra	ENSMUSG00000005364	1.02012	0
						XLOC_035752	Tex26	ENSMUSG00000029660	0	0.628371		XLOC_039597	Ssu2	NA	0.706681	37.8628
						XLOC_035754	Wdr95	ENSMUSG00000029658	0	2.01941		XLOC_039598	Oxtr	ENSMUSG00000049112	59.5568	12.1005
						XLOC_035883	Speer4c	ENSMUSG00000073208	0	2.00129		XLOC_039621	Atp2b2	NA	6.50441	1.24105
						XLOC_035954	Fam126a	NA	3.01705	16.9448		XLOC_039631	Mkrn2os	NA	16.5239	0.476714
						XLOC_036145	Msx1	NA	109.699	4.97959		XLOC_039635	Tmem40	ENSMUSG00000059900	19.9714	0.492452
						XLOC_036326	RP24-448C16.7	NA	0	0.821889		XLOC_039660	4933440N22Rik	ENSMUSG00000042087	1.08679	0
						XLOC_036332	Tlr1	NA	14.2082	1.52277		XLOC_039662	Fxyd4	ENSMUSG00000004988	189.3	9.24743
						XLOC_036351	9130230L23Rik	ENSMUSG00000054598	0	2.30675		XLOC_039667	Ret	ENSMUSG00000030110	3.13792	0.248285
						XLOC_036392	Zar1	ENSMUSG00000063935	0	9.92945		XLOC_039706	Rimklb	NA	0	8.675
						XLOC_036393	Gm5868	NA	0	2.31639		XLOC_039713	Slc2a3	NA	4.90271	22.0713
						XLOC_036394	Cnga1	NA	0	0.756734		XLOC_039738	Clstn3	NA	0.71598	7.57162
						XLOC_036432	Nmu	NA	2.92327	0		XLOC_039834	Olr1	ENSMUSG00000030162	0.176014	2.79702
						XLOC_036477	Tmprss11a	ENSMUSG00000072845	0	1.60194		XLOC_039877	Styk1	NA	7.86725	0.961466
						XLOC_036534	Adamts3	NA	1.35369	15.5202		XLOC_039919	E330021D16Rik	ENSMUSG00000045291	0	4.67421
						XLOC_036561	Ppef2	ENSMUSG00000029410	0	1.23603		XLOC_039921	Plbd1	NA	2.74852	24.3981
						XLOC_036579	C87414	NA	0	3.39256		XLOC_039928	Mgp	ENSMUSG00000030218	84.3098	675.83
						XLOC_036604	Prkg2	NA	0.819764	21.7453		XLOC_039970	Bcat1	NA	237.248	49.2407
						XLOC_036646	Mapk10	NA	0	0.755524		XLOC_039991	Gm15767	NA	0	0.874813
						XLOC_036654	Slc10a6	NA	21.5816	1.13827		XLOC_040038	Prkcg	NA	2.33196	21.0509
						XLOC_036677	Gbp4,Gbp8,Gbp9	NA	305.752	8.60998		XLOC_040130	Nlrp4b	NA	0	0.527194
						XLOC_036680	Gbp10,Gbp6	ENSMUSG00000105096;ENSMUSG00000079362	40.0199	1.32699		XLOC_040220	Obox1,Obox2	NA	0	6.99876
						XLOC_036766	1010001B22Rik	NA	4.23488	0		XLOC_040230	Obox5	NA	0	2.27253
						XLOC_036830	Tmem119	ENSMUSG00000054675	70.0868	10.8853		XLOC_040279	Psg22	NA	0	0.572164
						XLOC_036831	Selplg	NA	34.9266	2.37655		XLOC_040284	Pglyrp1	ENSMUSG00000030413	220.493	29.9401
						XLOC_036926	Oas3	NA	4.24652	0.293549		XLOC_040293	Dmpk	ENSMUSG00000030409	336.468	68.2965
						XLOC_036927	Oas1e	ENSMUSG00000066867	0	6.18753		XLOC_040331	Nlrp9b	NA	0	2.17276
						XLOC_036934	Trafd1	NA	125.896	16.8472		XLOC_040360	Nlrp4e	NA	0	1.10476
						XLOC_037093	Wbscr28	ENSMUSG00000040576	2.17747	0		XLOC_040361	Nlrp5	NA	0	6.01707
						XLOC_037095	Cldn4	ENSMUSG00000047501	96.6899	2.9888		XLOC_040393	Kcnn4	ENSMUSG00000054342	33.7933	1.99432
						XLOC_037105	Fzd9	NA	0.9516	0		XLOC_040404	Ceacam10	NA	0	41.2254
						XLOC_037107	Fkbp6	ENSMUSG00000040013	0	1.17627		XLOC_040439	Cyp2b10	NA	0	2.74101
						XLOC_037146	Serpine1	NA	2.10773	17.4712		XLOC_040447	Nlrp4a	NA	0	1.19112
						XLOC_037148	Muc3	NA	0.55823	0		XLOC_040449	Nlrp9a	NA	0	1.1353
						XLOC_037190	1700123K08Rik	ENSMUSG00000029526	0.508938	0		XLOC_040452	Cyp2a5	NA	0	0.549967
						XLOC_037232	Mmd2	NA	0	6.27876		XLOC_040485	Fcgbp	ENSMUSG00000047730	292.7	2.05791
						XLOC_037305	Rnf6	NA	0.881576	12.9661		XLOC_040569	2200002J24Rik	ENSMUSG00000013083	0	2.59689
						XLOC_037308	Gpr12	ENSMUSG00000041468	0.670775	0		XLOC_040572	Sbsn	NA	9.74856	341.4
						XLOC_037345	Hsph1	ENSMUSG00000029657	12.1301	77.6426		XLOC_040581	Dmkn	NA	0.431505	429.704
						XLOC_037348	Zar1l	NA	0	1.47226		XLOC_040582	Krtdap	NA	0.957267	2397.75
						XLOC_037394	Tac1	NA	0	1.03673		XLOC_040584	Gm29440	NA	0	1.53618
						XLOC_037441	Gm5874	NA	0	2.3128		XLOC_040682	Pepd	NA	89.8377	24.9653
						XLOC_037442	Gm26809	NA	4.48912	54.7583		XLOC_040686	Cebpa	ENSMUSG00000034957	3.65733	21.2517
						XLOC_037508	Cpa2	ENSMUSG00000071553	0	1.66666		XLOC_040824	Klk1	ENSMUSG00000063903	466.528	7.23828
						XLOC_037511	Cpa1	NA	0	3.78728		XLOC_040838	Napsa	NA	207.684	18.9343
						XLOC_037608	Wee2	NA	0	1.07665		XLOC_040899	Saa2	ENSMUSG00000057465	0	1.67999
						XLOC_037664	Trbc1,Trbc2,Trbd1,Trbj1-1,Trbj1-2,Trbj1-4,Trbj1-6,Trbj2-7	NA	56.0427	6.50483		XLOC_040975	Trpm1	NA	0.680972	0.133036
						XLOC_037760	Aoc1	ENSMUSG00000029811	1.20631	157.87		XLOC_041028	Rgma	NA	33.7545	3.58271
						XLOC_037763	Doxl2	NA	0	2.72787		XLOC_041206	Tenm4	NA	3.36163	16.2581
						XLOC_037774	Npy	NA	0	21.7852		XLOC_041262	Chrdl2	NA	182.255	5.44609
						XLOC_037790	Gm27477,Gm27861,Gm27867,Gm27868,Hotairm1	NA	0	1.73942		XLOC_041431	Nlrp14	NA	0	13.6513
						XLOC_037829	Aqp1	NA	122.91	19.0032		XLOC_041498	Spon1	ENSMUSG00000038156	43.2009	11.3908
						XLOC_037951	Igkv16-104	NA	0	4.12401		XLOC_041508	Calcb	NA	0	0.550872
						XLOC_038005	Igkv3-5	NA	3.55561	0		XLOC_041509	Insc	NA	0.174357	1.97953
						XLOC_038011	Igkc,Igkj1,Igkj2,Igkj4,Igkj5	NA	439.737	18.6229		XLOC_041544	Gm26147	NA	436.418	0
						XLOC_038016	Rpl34-ps1	NA	1025.04	126.155		XLOC_041565	Vwa3a	ENSMUSG00000030889	0.0551948	3.44477
						XLOC_038104	Atp6v1b1	ENSMUSG00000006269	0	0.692849		XLOC_041570	4933427G17Rik	NA	0	0.812166
						XLOC_038116	Spr-ps1	NA	0	2.93379		XLOC_041585	Prkcb	NA	5.85786	0.633654
						XLOC_038118	Noto	NA	0	1.6678		XLOC_041703	Tgfb1i1	ENSMUSG00000030782	204.853	55.9796
						XLOC_038121	Alms1	NA	0	3.4247		XLOC_041719	Btbd16	ENSMUSG00000040298	0	0.594197
						XLOC_038129	Tgfa	NA	0.974376	7.90872		XLOC_041774	Jakmip3	ENSMUSG00000056856	0	3.13262
						XLOC_038159	Gp9	ENSMUSG00000030054	1.65927	0		XLOC_041775	Jakmip3	ENSMUSG00000056856	0	14.8188
						XLOC_038174	4933427D06Rik	ENSMUSG00000055403	0	0.83355		XLOC_041776	Dpysl4	ENSMUSG00000025478	1.59289	22.2233
						XLOC_038224	Adamts9	ENSMUSG00000030022	0	5.33559		XLOC_041808	Urah	NA	79.4816	6.06929
						XLOC_038334	H1foo	ENSMUSG00000042279	0	11.1132		XLOC_041821	Pkp3	NA	37.1798	3.69398
						XLOC_038373	Ninj2	NA	0	1.90097		XLOC_041828	Drd4	ENSMUSG00000025496	1.04157	58.3038
						XLOC_038387	Usp18	ENSMUSG00000030107	31.0536	3.2721		XLOC_041832	Gm4535	NA	0	3.87907
						XLOC_038389	Slc6a12	NA	1.40654	29.7761		XLOC_041861	Syt8	NA	35.6406	0.637744
						XLOC_038391	A2m	ENSMUSG00000030111	2.68657	158.075		XLOC_041862	Tnni2	ENSMUSG00000031097	76.7671	15.0638
						XLOC_038394	Mug1	ENSMUSG00000059908	0	0.572163		XLOC_041891	Dhcr7	NA	16.2758	158.356
						XLOC_038395	Mug2	ENSMUSG00000030131	0	0.519356		XLOC_041944	Dnaaf3,Tnni3	NA	4.75756	39.1129
						XLOC_038397	Mug-ps1	NA	0	0.597691		XLOC_041946	Ptprh	ENSMUSG00000035429	1.84602	0
						XLOC_038408	Dppa3	ENSMUSG00000046323	0	10.5818		XLOC_041952	Cox6b2	NA	26.0227	122.87
						XLOC_038416	Clec4a1	NA	63.6083	0.870044		XLOC_041959	Sbk2	ENSMUSG00000030433	0	1.04634
						XLOC_038420	Clec4a2	NA	49.9432	1.88804		XLOC_041966	Rfpl4	ENSMUSG00000035191	0	3.91626
						XLOC_038423	Clec4d	ENSMUSG00000030144	0.759838	0		XLOC_041972	Nlrp2	NA	0	0.575
						XLOC_038439	C1ra	ENSMUSG00000055172	95.7734	14.6364		XLOC_042225	Ceacam15	ENSMUSG00000078795	0	1.09798
						XLOC_038441	C1rb	NA	16.5639	1.52056		XLOC_042255	Psg17	NA	1.1096	0
						XLOC_038453	Pianp	NA	84.9646	0.656272		XLOC_042268	Gipr	ENSMUSG00000030406	0.236472	5.90222
						XLOC_038465	Scnn1a	ENSMUSG00000030340	16.5747	1.9338		XLOC_042292	Apoc2,Apoc4	ENSMUSG00000002992;ENSMUSG00000074336	0	1.08596
						XLOC_038474	Vwf	NA	71.9078	4.81551		XLOC_042298	Cblc	ENSMUSG00000040525	38.4559	2.2707
						XLOC_038475	Ano2	NA	0.987657	0		XLOC_042408	Cd177	ENSMUSG00000052212	0	3.7512
						XLOC_038489	Cracr2a	NA	0	0.489526		XLOC_042412	Gm5893	NA	0	2.65492
						XLOC_038511	BC064078,Gm16187	NA	26.4886	2.2844		XLOC_042417	Atp1a3	NA	0.129076	37.3156
						XLOC_038518	Clec2d	NA	253.347	25.8206		XLOC_042429	Cxcl17	NA	119.686	11.0371
						XLOC_038520	Clec12a	NA	39.7706	1.12662		XLOC_042432	Ceacam1	ENSMUSG00000074272	44.0227	5.18368
						XLOC_038569	Bcl2l14	ENSMUSG00000030200	4.21258	0.207798		XLOC_042440	Cyp2s1	NA	3.05667	21.6998
						XLOC_038610	Pik3c2g	ENSMUSG00000030228	0.072628	179.06		XLOC_042443	Nlrp9c	NA	0	2.36102
						XLOC_038642	D6Ertd474e	NA	0	0.563801		XLOC_042574	Fxyd3	NA	424.232	92.0753
						XLOC_038673	Ppfibp1	NA	0.672855	9.16035		XLOC_042670	Zfp536	NA	0.023296	0.656039
						XLOC_038790	Asz1	ENSMUSG00000010796	0	0.493745		XLOC_042780	Myh14	NA	51.4345	3.75563
						XLOC_038806	Aass	NA	0	10.9735		XLOC_042826	Fut2	ENSMUSG00000055978	45.0332	3.64602
						XLOC_038819	Iqub	NA	0	0.469184		XLOC_042857	Ptpn5	NA	40.4901	0.112471
						XLOC_038838	Snd1	NA	10.9314	0		XLOC_042905	E2f8	NA	4.47879	27.1922
						XLOC_038935	Parp12	NA	64.4688	8.29332		XLOC_043157	Gm23490	NA	0	1.12539
						XLOC_039002	Nobox	NA	0	2.7554		XLOC_043282	AU020206	NA	32.3512	153.201
						XLOC_039008	Ezh2	NA	2.34866	16.4351		XLOC_043300	Rhcg	NA	0	0.969095
						XLOC_039082	9530018H14Rik	NA	0.798482	0		XLOC_043302	Plin1	ENSMUSG00000030546	0	1.75213
						XLOC_039155	Fam13a	ENSMUSG00000037709	0.569015	9.76669		XLOC_043305	Anpep	ENSMUSG00000039062	182.18	30.9703
						XLOC_039183	4930597O21Rik	ENSMUSG00000053442	0.680683	0		XLOC_043417	Prss23	ENSMUSG00000039405	37.5908	7.45473
						XLOC_039203	Igkv9-124	NA	4.91726	0		XLOC_043460	Myo7a	NA	0.36013	17.122
						XLOC_039218	Igkv19-93	NA	5.53996	0		XLOC_043461	Capn5,Omp	NA	40.7642	6.60822
						XLOC_039265	Igkv12-46	NA	4.97411	0		XLOC_043486	Snord15a	NA	14.408	0
						XLOC_039268	Igkv5-43	NA	18.5842	0		XLOC_043523	Folr1	ENSMUSG00000001827	4.16612	31.2642
						XLOC_039295	Igkv8-21	NA	2.51594	0		XLOC_043585	Hbb-bs	NA	17.8572	84.1149
						XLOC_039321	Atoh8	ENSMUSG00000037621	10.7399	108.179		XLOC_043614	Trim30a	ENSMUSG00000030921	14.8979	1.83718
						XLOC_039338	Dnah6	ENSMUSG00000052861	0.0712003	2.16536		XLOC_043615	Trim30d	ENSMUSG00000057596	5.13999	0.451541
						XLOC_039346	Gm9008	ENSMUSG00000072476	0	0.966551		XLOC_043646	Gm22504	NA	7.74875	0
						XLOC_039347	Ctnna2	ENSMUSG00000063063	0	1.99918		XLOC_043745	Mrvi1	ENSMUSG00000005611	67.6782	7.99071
						XLOC_039350	Reg3g	ENSMUSG00000030017	47.6157	0		XLOC_043910	Zg16	ENSMUSG00000049350	0	1.03724
						XLOC_039415	Cml3	NA	0	0.662867		XLOC_043979	Pstk	NA	1.14402	3.19677
						XLOC_039438	Anxa4	ENSMUSG00000029994	141.136	28.6994		XLOC_043989	1500002F19Rik	NA	0.0632087	1.59576
						XLOC_039480	Podxl2	ENSMUSG00000033152	65.9079	8.57284		XLOC_044023	Cfap46	NA	0.0153397	4.22386
						XLOC_039485	Gm839	NA	0	0.426468		XLOC_044031	Caly	ENSMUSG00000025468	0	2.17356
						XLOC_039503	Ccdc37	NA	0.18862	2.42184		XLOC_044055	Ano9	ENSMUSG00000054662	15.693	0.66101
						XLOC_039510	Wnt7a	ENSMUSG00000030093	9.96476	0.650908		XLOC_044096	H19,Mir675	NA	1.08781	24.7212
						XLOC_039514	Grip2	ENSMUSG00000030098	0.754244	13.9022		XLOC_044126	Mrgprg	ENSMUSG00000050276	0	2.41131
						XLOC_039597	Ssu2	NA	2.53455	36.4029		XLOC_044135	Ano1	NA	8.95876	70.1083
						XLOC_039662	Fxyd4	ENSMUSG00000004988	782.949	8.89182		XLOC_044212	Tex29	ENSMUSG00000031512	0	0.832559
						XLOC_039711	Gdf3	ENSMUSG00000030117	3.48857	0		XLOC_044227	F10	NA	0.016678	1.1304
						XLOC_039716	C3ar1	ENSMUSG00000040552	14.8728	0.503452		XLOC_044403	Sfrp1	ENSMUSG00000031548	1.29262	9.03777
						XLOC_039721	Clec4e	NA	2.06582	0		XLOC_044426	Star	NA	1.88535	349.349
						XLOC_039739	C1s1	NA	145.014	21.3163		XLOC_044473	Gm24727	NA	0	4.04347
						XLOC_039740	C1s2	NA	16.4341	2.04957		XLOC_044530	Sorbs2	NA	13.326	49.8864
						XLOC_039745	Ptpn6	NA	63.6711	5.29917		XLOC_044583	Hand2	NA	21.0822	259.12
						XLOC_039749	Lrrc23	NA	0.692105	9.15353		XLOC_044678	Comp	ENSMUSG00000031849	0	0.698451
						XLOC_039770	Tuba3a	ENSMUSG00000067702	0	0.566124		XLOC_044679	Crlf1	NA	15.7985	0.269993
						XLOC_039800	Tead4	NA	0.690602	13.0889		XLOC_044682	Isyna1	ENSMUSG00000019139	62.08	325.569
						XLOC_039815	Klrb1b,Klrb1c	NA	9.17884	0.2847		XLOC_044716	Slc27a1	ENSMUSG00000031808	8.17081	32.837
						XLOC_039834	Olr1	ENSMUSG00000030162	0	2.68865		XLOC_044747	Nwd1	ENSMUSG00000048148	0.0762393	0.994623
						XLOC_039835	1700101I11Rik	NA	0.54603	0		XLOC_044776	Ttc29	NA	0	1.40303
						XLOC_039840	Klrk1	NA	7.94276	0.52009		XLOC_044878	Gm2694	NA	0	1.38914
						XLOC_039854	Klra8	NA	0.801243	0		XLOC_044925	Irx5	NA	0	2.33288
						XLOC_039919	E330021D16Rik	ENSMUSG00000045291	0	4.49321		XLOC_044930	Lpcat2	NA	0.356996	7.59501
						XLOC_039961	Gm766	ENSMUSG00000048473	0.52529	0		XLOC_044932	Slc6a2	ENSMUSG00000055368	0.239772	8.96897
						XLOC_039982	Gm15720	NA	0	0.923033		XLOC_044937	Mt4	ENSMUSG00000031757	0	167.166
						XLOC_039991	Gm15767	NA	0	0.841074		XLOC_044938	Mt3	ENSMUSG00000031760	0	73.3748
						XLOC_040039	Cacng7	NA	55.4421	7.93026		XLOC_044939	Mt2	ENSMUSG00000031762	210.172	2702.5
						XLOC_040040	Cacng8	ENSMUSG00000053395	0	0.94357		XLOC_044949	Nlrc5	NA	26.9577	2.77058
						XLOC_040057	Gm15931	NA	0.442361	0		XLOC_044965	Drc7	ENSMUSG00000031786	0	1.32776
						XLOC_040110	Zfp78	ENSMUSG00000055150	0	0.975713		XLOC_045005	Cdh5	ENSMUSG00000031871	6.17024	41.1692
						XLOC_040130	Nlrp4b	NA	0	0.506855		XLOC_045010	Cmtm1	NA	0	2.03894
						XLOC_040220	Obox1,Obox2	NA	0	6.72656		XLOC_045025	Ces2a	NA	0	8.96333
						XLOC_040230	Obox5	NA	0	2.18391		XLOC_045052	Plekhg4	NA	0.193032	66.2085
						XLOC_040279	Psg22	NA	0	0.550086		XLOC_045053	Lrrc36	ENSMUSG00000054320	0.166594	2.69007
						XLOC_040331	Nlrp9b	NA	0	2.08866		XLOC_045056	Hsd11b2	ENSMUSG00000031891	216.028	32.8222
						XLOC_040360	Nlrp4e	NA	0	1.06208		XLOC_045059	Agrp	NA	0	4.02072
						XLOC_040361	Nlrp5	NA	0	5.78446		XLOC_045068	Tsnaxip1	ENSMUSG00000031893	0	2.77538
						XLOC_040404	Ceacam10	NA	0	39.6307		XLOC_045086	Cdh3	ENSMUSG00000061048	4.10361	21.2421
						XLOC_040439	Cyp2b10	NA	0	2.63486		XLOC_045090	Cdh1	NA	50.2447	6.95246
						XLOC_040447	Nlrp4a	NA	0	1.14515		XLOC_045163	Dynlrb2	ENSMUSG00000034467	0	27.2019
						XLOC_040449	Nlrp9a	NA	0	1.09227		XLOC_045193	Atp2c2	ENSMUSG00000034112	48.8097	1.09817
						XLOC_040452	Cyp2a5	NA	0	0.52867		XLOC_045224	Kcnk1	ENSMUSG00000033998	75.5773	10.5458
						XLOC_040475	Zfp626	ENSMUSG00000030604	0	0.741653		XLOC_045349	Angpt2	ENSMUSG00000031465	2.40509	21.1157
						XLOC_040485	Fcgbp	ENSMUSG00000047730	88.8804	1.97889		XLOC_045399	Nek5	ENSMUSG00000037738	0	1.80558
						XLOC_040502	Ifnl3	ENSMUSG00000060747	0	1.49689		XLOC_045430	Adam32	NA	0	0.506283
						XLOC_040513	Lgals7	ENSMUSG00000053522	37.5285	1.35564		XLOC_045435	Tacc1	ENSMUSG00000065954	9.61443	34.9232
						XLOC_040526	Ppp1r14a	ENSMUSG00000037166	349.028	45.5441		XLOC_045475	Rab11fip1	ENSMUSG00000031488	7.5092	1.75867
						XLOC_040559	Tyrobp	ENSMUSG00000030579	274.638	25.2371		XLOC_045509	Rbpms	ENSMUSG00000031586	174.779	29.1138
						XLOC_040569	2200002J24Rik	ENSMUSG00000013083	0	2.49501		XLOC_045626	AV026068	NA	32.2045	252.756
						XLOC_040571	Atp4a	NA	0	1.13566		XLOC_045658	Trim75	ENSMUSG00000071089	0	0.79629
						XLOC_040577	Gapdhs	NA	0	0.842428		XLOC_045928	Cbln1	ENSMUSG00000031654	0	6.18428
						XLOC_040581	Dmkn	NA	11.1709	413.021		XLOC_045949	Aktip	NA	71.5741	12.4928
						XLOC_040582	Krtdap	NA	16.0845	2303.27		XLOC_045956	Crnde	NA	0	0.674471
						XLOC_040584	Gm29440	NA	0	1.47627		XLOC_045968	Ces1f	NA	0	4.40725
						XLOC_040585	Gm17077	NA	0	3.0807		XLOC_046006	Gm15681	NA	0	0.529558
						XLOC_040787	Siglecg	NA	9.55116	0.251072		XLOC_046023	Cmtm1,Cmtm2a	NA	0	3.11162
						XLOC_040806	Klk6	ENSMUSG00000050063	0	1.4308		XLOC_046029	Cdh16	ENSMUSG00000031881	4.68787	0.347339
						XLOC_040824	Klk1	ENSMUSG00000063903	0	6.95895		XLOC_046234	Gm26397	NA	73.9106	0
						XLOC_040950	Oca2	ENSMUSG00000030450	0	0.471042		XLOC_046275	Casp1	ENSMUSG00000025888	31.9999	4.02566
						XLOC_040967	Gm5898	NA	0	0.926777		XLOC_046294	Mmp8	ENSMUSG00000005800	0	0.618448
						XLOC_040991	Adamts17	ENSMUSG00000058145	0.0709756	1.13756		XLOC_046297	Mmp7	NA	107.027	21.2688
						XLOC_041028	Rgma	NA	29.8488	3.44424		XLOC_046315	Gm16485	ENSMUSG00000078117	21.8358	5.49225
						XLOC_041062	Isg20	ENSMUSG00000039236	177.552	32.2457		XLOC_046447	Cnn1	ENSMUSG00000001349	451.533	50.0565
						XLOC_041085	Ttll13	ENSMUSG00000045467	0	0.530328		XLOC_046486	Adamts8	NA	4.39139	0.217445
						XLOC_041104	Whamm	ENSMUSG00000045795	37.5304	6.56174		XLOC_046506	Gm27164	NA	0	0.672592
						XLOC_041169	Nox4	NA	0.277638	2.33356		XLOC_046650	Pvrl1	ENSMUSG00000032012	1.34428	10.3922
						XLOC_041184	Ccdc89	ENSMUSG00000044362	0	0.643561		XLOC_046662	Ccdc153	ENSMUSG00000070306	0	16.1824
						XLOC_041206	Tenm4	NA	0.682115	15.6275		XLOC_046704	Apoa1	NA	0	14.6074
						XLOC_041243	Wnt11	NA	87.5851	6.02617		XLOC_046705	Apoa4	ENSMUSG00000032080	0	9.0026
						XLOC_041431	Nlrp14	NA	0	13.1242		XLOC_046731	Plet1	NA	144.085	29.9745
						XLOC_041488	Tead1	ENSMUSG00000055320	1.81834	11.2698		XLOC_046737	Cryab	ENSMUSG00000032060	83.055	558.548
						XLOC_041509	Insc	NA	0	1.90345		XLOC_046741	Btg4	ENSMUSG00000032056	0	2.42397
						XLOC_041534	Xylt1	NA	0	0.77872		XLOC_046750	Gm27686	NA	0	0.94376
						XLOC_041542	Ccp110	NA	0.674082	8.0415		XLOC_046764	Slc35f2	ENSMUSG00000042195	3.23375	22.2219
						XLOC_041551	Gm5601	NA	0	1.31535		XLOC_046773	Crabp1	NA	76.4941	9.95683
						XLOC_041570	4933427G17Rik	NA	0	0.780791		XLOC_046781	AI118078	NA	12.1445	0.990517
						XLOC_041595	Slc5a11	NA	100.323	3.20742		XLOC_046812	Gm6166	NA	0	9.083
						XLOC_041629	G730046D07Rik	NA	1.10453	0.455373		XLOC_046827	Sema7a	ENSMUSG00000038264	6.24068	23.3252
						XLOC_041699	Itgam	ENSMUSG00000030786	17.6277	1.02422		XLOC_046828	Cyp11a1	NA	0.329113	1542.19
						XLOC_041717	Fgfr2	NA	30.8873	0		XLOC_046830	Stra6	NA	4.70004	94.5917
						XLOC_041718	Fgfr2	NA	9.59499	0		XLOC_046842	Hcn4	ENSMUSG00000032338	0	10.0024
						XLOC_041719	Btbd16	ENSMUSG00000040298	0.136838	0.57117		XLOC_046910	Igdcc3	ENSMUSG00000032394	0.632422	5.90055
						XLOC_041730	Hmx2	NA	0.478532	0		XLOC_046935	Car12	NA	66.5235	9.12139
						XLOC_041739	Fgfr2	NA	29.2408	0		XLOC_046973	Aldh1a2	NA	747.742	99.4871
						XLOC_041775	Jakmip3	ENSMUSG00000056856	0	14.2474		XLOC_047026	Bcl2l10	ENSMUSG00000032191	0	10.066
						XLOC_041784	Kndc1	NA	0	2.48226		XLOC_047053	Gsta4	ENSMUSG00000032348	9.50001	60.1706
						XLOC_041789	Prap1	NA	29.723	1293.5		XLOC_047056	Omt2b	ENSMUSG00000038750	0	5.45003
						XLOC_041817	Ifitm1	ENSMUSG00000025491	2456.13	203.236		XLOC_047098	Sh3bgrl2	ENSMUSG00000032261	21.6227	2.68877
						XLOC_041861	Syt8	NA	5.91888	0.613303		XLOC_047170	Rasgrf1	NA	8.81638	0.119172
						XLOC_041864	Lsp1	ENSMUSG00000018819	855.285	53.856		XLOC_047173	Ctsh	NA	43.7615	8.63204
						XLOC_041891	Dhcr7	NA	18.8452	152.274		XLOC_047242	Rbp2	ENSMUSG00000032454	0	0.55901
						XLOC_041918	Pirb	NA	13.4881	0.25334		XLOC_047373	Manf	NA	0.535405	3.32292
						XLOC_041919	Gm15922	NA	0.387737	0		XLOC_047440	Pfkfb4	NA	4.13992	27.7458
						XLOC_041923	Pira2	NA	2.39367	0		XLOC_047443	Plxnb1	NA	3.93258	21.278
						XLOC_041931	Lair1	ENSMUSG00000055541	13.8111	0.414471		XLOC_047454	Spink8	NA	2.72594	49.2746
						XLOC_041954	Il11	NA	0	6.42496		XLOC_047486	Lrrc2	NA	0	1.39876
						XLOC_041966	Rfpl4	ENSMUSG00000035191	0	3.76473		XLOC_047490	Ltf	NA	580.712	34.9235
						XLOC_041972	Nlrp2	NA	0	0.552723		XLOC_047537	Gm17399	NA	0	0.697276
						XLOC_042050	Gm20482	NA	0.523307	0		XLOC_047570	Myrip	NA	5.34852	0.447176
						XLOC_042225	Ceacam15	ENSMUSG00000078795	0	1.0554		XLOC_047581	Gm22987	NA	0	0.722083
						XLOC_042255	Psg17	NA	0.998024	0		XLOC_047636	Nlrp4g	ENSMUSG00000079741	0	0.766737
						XLOC_042268	Gipr	ENSMUSG00000030406	0	5.67497		XLOC_047712	Izumo1r	NA	0	2.61718
						XLOC_042294	Apoe	NA	2757.34	288.34		XLOC_047714	Hephl1	ENSMUSG00000031936	0	2.35174
						XLOC_042298	Cblc	ENSMUSG00000040525	20.9344	2.18246		XLOC_047794	Ap1m2	ENSMUSG00000003309	52.6018	5.02089
						XLOC_042412	Gm5893	NA	0	2.55287		XLOC_047820	Acp5	ENSMUSG00000001348	41.3692	8.53023
						XLOC_042417	Atp1a3	NA	1.39484	35.8598		XLOC_047847	Glb1l3	ENSMUSG00000031966	0	1.09893
						XLOC_042427	Cnfn	ENSMUSG00000063651	10.2266	0		XLOC_047862	St14	NA	127.644	8.62032
						XLOC_042429	Cxcl17	NA	88.942	10.6095		XLOC_047864	Tmem45b	ENSMUSG00000041737	24.118	1.05103
						XLOC_042443	Nlrp9c	NA	0	2.26988		XLOC_047982	Sc5d	ENSMUSG00000032018	16.5722	71.7467
						XLOC_042466	Gm10651	NA	1.45429	0		XLOC_047986	Gm26272	NA	0	1.06123
						XLOC_042568	Mag	ENSMUSG00000036634	1.84281	0.111512		XLOC_048019	Gm10080	NA	0.68332	0
						XLOC_042575	Hpn	ENSMUSG00000001249	46.4568	3.47761		XLOC_048046	Tmprss4	NA	70.4711	6.27606
						XLOC_042760	Siglece	ENSMUSG00000030474	30.8948	0.489746		XLOC_048051	4833428L15Rik	NA	0	0.540331
						XLOC_042826	Fut2	ENSMUSG00000055978	23.027	3.50492		XLOC_048062	Apoc3	NA	0	2.09992
						XLOC_042848	Saa3	ENSMUSG00000040026	386.489	64.0853		XLOC_048065	Gm10680	NA	0	17.1708
						XLOC_042850	Saa1	ENSMUSG00000074115	8.87694	0		XLOC_048122	Fdx1	ENSMUSG00000032051	46.2125	771.221
						XLOC_042905	E2f8	NA	1.97467	26.1344		XLOC_048139	Tnfaip8l3	ENSMUSG00000074345	31.8007	7.71103
						XLOC_043157	Gm23490	NA	0	1.08186		XLOC_048140	Cyp19a1	ENSMUSG00000032274	0	4.27325
						XLOC_043211	Pgpep1l	ENSMUSG00000030553	255.848	0		XLOC_048144	Acsbg1	NA	0.0388196	134.647
						XLOC_043300	Rhcg	NA	0	0.931736		XLOC_048185	Lman1l	NA	0	1.78998
						XLOC_043305	Anpep	ENSMUSG00000039062	362.756	29.7642		XLOC_048208	Nr2e3	NA	0	3.23016
						XLOC_043316	Fes	ENSMUSG00000053158	31.4728	5.05194		XLOC_048241	Smad6	NA	7.57014	53.1598
						XLOC_043338	Ap3b2	ENSMUSG00000062444	32.0238	1.10193		XLOC_048380	Tinag	NA	0.56301	0
						XLOC_043359	Cemip	NA	0.822475	8.19298		XLOC_048382	Mlip	NA	0.974996	0.032184
						XLOC_043454	Thrsp	NA	171.045	9.83903		XLOC_048392	Omt2a	NA	0	1.78761
						XLOC_043460	Myo7a	NA	2.49282	16.4575		XLOC_048395	Dppa5a	ENSMUSG00000060461	0	7.15701
						XLOC_043474	Gm15506	NA	0	0.512838		XLOC_048396	Ooep	NA	0	5.16038
						XLOC_043523	Folr1	ENSMUSG00000001827	0.686228	30.0581		XLOC_048460	Me1	NA	20.8383	258.885
						XLOC_043526	Il18bp,Rnf121	ENSMUSG00000070427;ENSMUSG00000070426	103.578	13.3842		XLOC_048553	Pls1	NA	21.7314	2.72987
						XLOC_043762	Parva	NA	38.7453	0		XLOC_048609	Cldn18	ENSMUSG00000032473	0	4.09306
						XLOC_043784	Cyp2r1	NA	0	1.69853		XLOC_048679	Col6a4	NA	357.377	11.9594
						XLOC_043791	Gm4353	ENSMUSG00000091900	0	2.12609		XLOC_048718	Slc38a3	ENSMUSG00000010064	0	4.49617
						XLOC_043792	Plekha7	ENSMUSG00000045659	1.58644	21.3951		XLOC_048760	Fbxw21	NA	0	2.96574
						XLOC_043828	Dnah3	ENSMUSG00000052273	0	0.981263		XLOC_048761	Fbxw13	ENSMUSG00000049314	0	0.688989
						XLOC_043829	Zp2	ENSMUSG00000030911	0	14.1068		XLOC_048762	Fbxw20	NA	0	1.27853
						XLOC_043896	Coro1a	NA	136.811	11.8621		XLOC_048763	Fbxw14	NA	0	3.36479
						XLOC_043952	Pycard	NA	48.3313	5.61278		XLOC_048765	Fbxw14	NA	0	3.12567
						XLOC_043973	Gm5602	NA	1.11116	0.171935		XLOC_048768	Fbxw22	ENSMUSG00000070324	0	2.02375
						XLOC_043974	Plekha1	NA	60.2271	0		XLOC_048769	Fbxw16	NA	0	0.971439
						XLOC_043979	Pstk	NA	9.01235	3.07246		XLOC_048771	RP24-187P11.4	NA	0	0.581021
						XLOC_043981	Gm16477	NA	350.368	0.0604426		XLOC_048773	Fbxw15	NA	0	4.82019
						XLOC_043996	Gm15483	NA	0.531151	0		XLOC_048775	Fbxw24	ENSMUSG00000062275	0	8.43823
						XLOC_044000	D7Ertd443e	ENSMUSG00000030994	0	0.921459		XLOC_048776	Fbxw25	NA	0	0.741871
						XLOC_044023	Cfap46	NA	0	4.05936		XLOC_048777	Fbxw18	NA	0	4.7008
						XLOC_044064	Cdhr5	ENSMUSG00000025497	0.421107	8.21953		XLOC_048778	Fbxw26	ENSMUSG00000059547	0	2.31117
						XLOC_044065	Sct	ENSMUSG00000038580	17.014	240.543		XLOC_048779	RP23-357H5.5	NA	0	0.943596
						XLOC_044115	Phlda2	ENSMUSG00000010760	0	10.172		XLOC_048890	Ccdc13	ENSMUSG00000079235	0	2.35835
						XLOC_044126	Mrgprg	ENSMUSG00000050276	0	2.31838		XLOC_048911	Cdcp1	ENSMUSG00000035498	9.16743	1.47309
						XLOC_044196	Tnfsf13b	NA	24.3933	1.66711		XLOC_049242	Il13ra1	ENSMUSG00000017057	18.9106	4.05479
						XLOC_044212	Tex29	ENSMUSG00000031512	0	0.800469		XLOC_049279	Rhox5	NA	0	1.76936
						XLOC_044218	Spaca7	NA	0	6.6879		XLOC_049388	4930502E18Rik	NA	0	2.38305
						XLOC_044261	Myom2	ENSMUSG00000031461	0	1.02022		XLOC_049421	1600025M17Rik	NA	0	1.51456
						XLOC_044386	1810012K16Rik	NA	1.64113	0		XLOC_049530	Gpr50	NA	0	3.41519
						XLOC_044426	Star	NA	2.17011	335.845		XLOC_049563	Dusp9	ENSMUSG00000031383	0	2.92784
						XLOC_044495	D8Ertd82e	NA	21.526	2.88303		XLOC_049564	Slc6a8	ENSMUSG00000019558	20.7784	122.155
						XLOC_044530	Sorbs2	NA	7.75607	47.947		XLOC_049722	Arx	NA	0	5.55671
						XLOC_044549	Enpp6	NA	0	2.67976		XLOC_049754	Heph	NA	2.29209	10.1329
						XLOC_044595	Hmgb2	ENSMUSG00000054717	20.4093	124.05		XLOC_049768	Efnb1	ENSMUSG00000031217	9.00528	35.823
						XLOC_044609	Mfap3l	NA	0.225789	3.16894		XLOC_049796	Foxo4	NA	9.42348	35.1241
						XLOC_044631	March1	NA	2.35431	0.101096		XLOC_050050	Drp2	NA	4.61805	0.664658
						XLOC_044747	Nwd1	ENSMUSG00000048148	0	0.956356		XLOC_050090	Bex4	NA	1.0747	41.7848
						XLOC_044776	Ttc29	NA	0	1.34855		XLOC_050105	Tceal3	NA	45.5398	4.61059
						XLOC_044837	Klf1	ENSMUSG00000054191	0	0.608434		XLOC_050127	Nrk	NA	3.21864	0.418214
						XLOC_044878	Gm2694	NA	0	1.33525		XLOC_050134	Rnf128	NA	285.14	18.7425
						XLOC_044925	Irx5	NA	0	2.2415		XLOC_050138	E230019M04Rik	ENSMUSG00000042433	0	0.554
						XLOC_044937	Mt4	ENSMUSG00000031757	0	160.733		XLOC_050329	Smpx	NA	0	4.81252
						XLOC_044944	Slc12a3	ENSMUSG00000031766	0	0.508998		XLOC_050340	Map7d2	NA	0.311935	8.87514
						XLOC_044949	Nlrc5	NA	77.2696	2.66468		XLOC_050376	Tmem27	NA	0	0.60997
						XLOC_044965	Drc7	ENSMUSG00000031786	0	1.27604		XLOC_050378	Ace2	NA	0	1.47321
						XLOC_044979	Ccdc113	ENSMUSG00000036598	0	2.25991		XLOC_050383	Asb11	NA	0	0.746177
						XLOC_044987	Gm10094	NA	1.01936	0		XLOC_050472	Gata1	ENSMUSG00000031162	0	0.532388
						XLOC_045010	Cmtm1	NA	0	1.96022		XLOC_050473	Glod5	NA	0	1.38376
						XLOC_045025	Ces2a	NA	0	8.61721		XLOC_050494	Gm14502	NA	0	2.22717
						XLOC_045052	Plekhg4	NA	0.127851	63.659		XLOC_050560	Ndp	NA	0.99017	17.0523
						XLOC_045056	Hsd11b2	ENSMUSG00000031891	350.919	31.5602		XLOC_050727	Btg1-ps2	NA	0	0.784841
						XLOC_045059	Agrp	NA	0	3.86498		XLOC_050729	Rhox12	ENSMUSG00000071766	0	1.30419
						XLOC_045060	Agrp	NA	0	4.73129		XLOC_050786	Smarca1	NA	0.971455	8.60652
						XLOC_045063	Gm38384	NA	0	0.517623		XLOC_050816	Hs6st2	NA	0	2.80766
						XLOC_045068	Tsnaxip1	ENSMUSG00000031893	0	2.66714		XLOC_050847	AW822252	NA	0	1.94885
						XLOC_045086	Cdh3	ENSMUSG00000061048	2.99654	20.4192		XLOC_050867	Arhgef6	ENSMUSG00000031133	7.61568	28.7525
						XLOC_045163	Dynlrb2	ENSMUSG00000034467	0	26.1344		XLOC_050899	Sox3	ENSMUSG00000045179	0	2.4713
						XLOC_045168	Bco1	NA	0	5.51911		XLOC_051004	Trex2	NA	1.07094	0
						XLOC_045192	Wfdc1	ENSMUSG00000023336	239.907	20.9379		XLOC_051254	H3f3a-ps1	NA	22.2165	0
						XLOC_045193	Atp2c2	ENSMUSG00000034112	19.8192	1.05544		XLOC_051263	Cited1	NA	2.62838	63.6506
						XLOC_045264	Cd209a	NA	0	0.821927		XLOC_051301	Slc16a2	NA	3.57347	18.0381
						XLOC_045276	Ctxn1	NA	123.441	22.2591		XLOC_051334	Fnd3c2	NA	0	0.43509
						XLOC_045302	Rab20	ENSMUSG00000031504	63.1437	5.12924		XLOC_051339	Gm6325	NA	0	0.639074
						XLOC_045376	Gm15056	NA	10.2152	0		XLOC_051350	Itm2a	ENSMUSG00000031239	7.17328	38.5966
						XLOC_045398	Atp7b	NA	0	2.94556		XLOC_051358	Hmgn5	ENSMUSG00000031245	12.2243	60.4613
						XLOC_045399	Nek5	ENSMUSG00000037738	0	1.73564		XLOC_051366	Rps6ka6	NA	0.718586	4.49967
						XLOC_045509	Rbpms	ENSMUSG00000031586	159.755	27.9887		XLOC_051502	Tceal5	ENSMUSG00000054034	5.49561	0.396306
						XLOC_045536	Msr1	ENSMUSG00000025044	7.588	0.408773		XLOC_051540	Gm24380	NA	1.62945	0
						XLOC_045544	Fgl1	ENSMUSG00000031594	0.526828	0		XLOC_051554	Tsc22d3	NA	17.5605	64.3519
						XLOC_045654	Msmo1	NA	12.7411	132.04		XLOC_051582	Capn6	NA	0.148956	5.70039
						XLOC_045658	Trim75	ENSMUSG00000071089	0	0.76545		XLOC_051747	Gm15201	NA	0	0.989468
						XLOC_045759	Bst2	ENSMUSG00000046718	1361.18	213.086		XLOC_051780	Egfl6	NA	16.7249	0.593588
						XLOC_045780	Gm16091	NA	0	1.59207		XLOC_051790	Prps2	NA	9.69487	54.1458
						XLOC_045821	1700011L22Rik	ENSMUSG00000031682	1.36671	0		XLOC_052513	Uty	NA	0.500771	0
						XLOC_045861	AC156028.2	NA	0	12.0865
						XLOC_045956	Crnde	NA	0	0.648332
						XLOC_045978	9330175E14Rik	NA	17.5077	0.560343
						XLOC_045980	Pllp	ENSMUSG00000031775	66.967	2.66691
						XLOC_046006	Gm15681	NA	0	0.509091
						XLOC_046023	Cmtm1,Cmtm2a	NA	0	2.99086
						XLOC_046119	Gm26816	NA	0	0.501681
						XLOC_046130	Mlkl	NA	32.2182	3.85756
						XLOC_046131	Fa2h	NA	0	1.56426
						XLOC_046154	Adamts18	ENSMUSG00000053399	0	0.64148
						XLOC_046192	Slc38a8	ENSMUSG00000034224	0	2.59188
						XLOC_046202	Cotl1	ENSMUSG00000031827	256.158	32.9678
						XLOC_046275	Casp1	ENSMUSG00000025888	36.5026	3.86929
						XLOC_046276	Casp4	ENSMUSG00000033538	78.8192	3.95627
						XLOC_046291	Mmp3	ENSMUSG00000043613	4.44412	0
						XLOC_046419	Icam4	ENSMUSG00000001014	0	2.985
						XLOC_046436	AB124611	NA	40.893	1.50095
						XLOC_046441	Ldlr	ENSMUSG00000032193	5.24669	32.4129
						XLOC_046488	Gm17508	NA	13.8425	0
						XLOC_046631	Gm25401	NA	96.5727	0
						XLOC_046662	Ccdc153	ENSMUSG00000070306	0	15.557
						XLOC_046704	Apoa1	NA	0	14.0422
						XLOC_046705	Apoa4	ENSMUSG00000032080	0	8.6542
						XLOC_046737	Cryab	ENSMUSG00000032060	67.7373	536.774
						XLOC_046741	Btg4	ENSMUSG00000032056	0	2.33052
						XLOC_046812	Gm6166	NA	0	8.73133
						XLOC_046828	Cyp11a1	NA	0	1482.34
						XLOC_046831	Gm16131	NA	0	1.13551
						XLOC_046837	4930461G14Rik	NA	1.42952	0
						XLOC_046999	Gm36936	NA	0	0.712934
						XLOC_047009	Rab27a	NA	4.19873	29.2403
						XLOC_047026	Bcl2l10	ENSMUSG00000032191	0	9.67757
						XLOC_047044	Gm19569	NA	0	0.628206
						XLOC_047046	Klhl31	NA	0	0.643884
						XLOC_047056	Omt2b	ENSMUSG00000038750	0	5.23935
						XLOC_047163	Bcl2a1b,Gm29094,Mthfs	ENSMUSG00000089929;ENSMUSG00000100838;ENSMUSG00000066442	143.933	8.12091
						XLOC_047181	Gm29408	NA	0	21.4715
						XLOC_047209	Paqr9	NA	0	0.666396
						XLOC_047229	Gm10123	NA	0	5.24119
						XLOC_047242	Rbp2	ENSMUSG00000032454	0	0.537079
						XLOC_047268	Nme9	NA	0	4.79209
						XLOC_047373	Manf	NA	0	3.19386
						XLOC_047383	Cacna2d2	ENSMUSG00000010066	0.0387151	0.675869
						XLOC_047469	Ngp	ENSMUSG00000032484	11.0824	0
						XLOC_047486	Lrrc2	NA	0	1.3447
						XLOC_047490	Ltf	NA	255.086	33.5601
						XLOC_047537	Gm17399	NA	0	0.670362
						XLOC_047558	Cx3cr1	ENSMUSG00000052336	0	1.32643
						XLOC_047581	Gm22987	NA	0	0.694245
						XLOC_047633	Ccr5	NA	14.2087	1.70366
						XLOC_047636	Nlrp4g	ENSMUSG00000079741	0	0.737133
						XLOC_047714	Hephl1	ENSMUSG00000031936	0	2.26067
						XLOC_047729	Zfp558	ENSMUSG00000074500	0	0.828167
						XLOC_047783	1700084C06Rik	NA	0	3.9063
						XLOC_047794	Ap1m2	ENSMUSG00000003309	39.146	4.82634
						XLOC_047816	Ccdc151	ENSMUSG00000039632	0	1.39306
						XLOC_047847	Glb1l3	ENSMUSG00000031966	0	1.05632
						XLOC_047860	Adamts15	ENSMUSG00000033453	21.466	2.49595
						XLOC_047877	Gm37758	NA	0	2.21841
						XLOC_047926	Ccdc15	ENSMUSG00000034303	0	0.852088
						XLOC_047982	Sc5d	ENSMUSG00000032018	1.68787	68.9641
						XLOC_047986	Gm26272	NA	0	1.02055
						XLOC_048014	AC122428.1	NA	0	10.7291
						XLOC_048048	Il10ra	NA	14.2348	1.41318
						XLOC_048051	4833428L15Rik	NA	0	0.519517
						XLOC_048062	Apoc3	NA	0	2.01957
						XLOC_048065	Gm10680	NA	0	16.5119
						XLOC_048116	4833427G06Rik	ENSMUSG00000032057	0	3.14269
						XLOC_048122	Fdx1	ENSMUSG00000032051	26.9375	741.238
						XLOC_048140	Cyp19a1	ENSMUSG00000032274	0	4.10783
						XLOC_048144	Acsbg1	NA	0.249006	129.441
						XLOC_048185	Lman1l	NA	0	1.72094
						XLOC_048194	Loxl1	ENSMUSG00000032334	84.5938	15.9819
						XLOC_048204	Tmem202	ENSMUSG00000049526	0	0.788275
						XLOC_048208	Nr2e3	NA	0	3.10512
						XLOC_048243	Zwilch	NA	2.26129	18.3552
						XLOC_048304	Fam81a	NA	0.184198	2.14594
						XLOC_048331	Gm7866	NA	3.18028	0
						XLOC_048392	Omt2a	NA	0	1.71849
						XLOC_048395	Dppa5a	ENSMUSG00000060461	0	6.87903
						XLOC_048396	Ooep	NA	0	4.96077
						XLOC_048405	Gm8116	NA	0	3.33046
						XLOC_048421	Htr1b	NA	0	1.51169
						XLOC_048434	Lca5	NA	0.169752	1.7754
						XLOC_048460	Me1	NA	4.61543	248.848
						XLOC_048463	Snap91	NA	0.108697	1.55859
						XLOC_048619	Slc35g2	NA	0	3.07495
						XLOC_048717	Gm19721	NA	0.498339	0.0271564
						XLOC_048718	Slc38a3	ENSMUSG00000010064	0.160543	4.32205
						XLOC_048757	Atrip,Trex1	ENSMUSG00000025646;ENSMUSG00000049734	127.879	17.8303
						XLOC_048760	Fbxw21	NA	0	2.85069
						XLOC_048761	Fbxw13	ENSMUSG00000049314	0	0.66215
						XLOC_048762	Fbxw20	NA	0	1.22888
						XLOC_048763	Fbxw14	NA	0	3.23435
						XLOC_048765	Fbxw14	NA	0	3.00446
						XLOC_048768	Fbxw22	ENSMUSG00000070324	0	1.94566
						XLOC_048769	Fbxw16	NA	0	0.933826
						XLOC_048770	Fbxw19	NA	0	2.56317
						XLOC_048771	RP24-187P11.4	NA	0	0.558552
						XLOC_048773	Fbxw15	NA	0	4.63389
						XLOC_048775	Fbxw24	ENSMUSG00000062275	0	8.11107
						XLOC_048776	Fbxw25	NA	0	0.713132
						XLOC_048778	Fbxw26	ENSMUSG00000059547	0	2.22165
						XLOC_048779	RP23-357H5.5	NA	0	0.906744
						XLOC_048781	Camp	NA	3.8682	0
						XLOC_048798	Pth1r	NA	179.399	17.5191
						XLOC_048804	RP24-166N8.9	NA	3.04605	0
						XLOC_048805	Ccrl2	ENSMUSG00000043953	11.9804	0.802192
						XLOC_048890	Ccdc13	ENSMUSG00000079235	0	2.26737
						XLOC_048911	Cdcp1	ENSMUSG00000035498	10.4247	1.41619
						XLOC_049012	Dgkk	NA	0	2.71574
						XLOC_049017	Cacna1f	NA	0.52277	0
						XLOC_049040	Rbm3os	NA	0	1.21036
						XLOC_049157	Rgn	ENSMUSG00000023070	0	1.77751
						XLOC_049421	1600025M17Rik	NA	0	1.45555
						XLOC_049423	6330419J24Rik	NA	0	2.0499
						XLOC_049510	Aff2	NA	0	0.492799
						XLOC_049523	Mamld1	NA	0.649602	8.02256
						XLOC_049526	Mtm1	ENSMUSG00000031337	0.0523634	3.41835
						XLOC_049544	Nsdhl	ENSMUSG00000031349	7.08283	38.2427
						XLOC_049684	5430427O19Rik	ENSMUSG00000025058	1.23843	0
						XLOC_049722	Arx	NA	0	5.34043
						XLOC_049725	Pcyt1b	ENSMUSG00000035246	14.3693	1.51128
						XLOC_049775	Eda	NA	6.28607	0.708527
						XLOC_049788	Gdpd2	NA	0.129296	10.2375
						XLOC_049906	Lpar4	NA	0	1.15764
						XLOC_050080	Gprasp2	NA	1.08468	8.1518
						XLOC_050130	Mum1l1	NA	0.0469868	1.88804
						XLOC_050138	E230019M04Rik	ENSMUSG00000042433	0	0.532527
						XLOC_050167	Pak3	NA	0.0510677	1.90394
						XLOC_050329	Smpx	NA	0	4.62648
						XLOC_050340	Map7d2	NA	0	8.52908
						XLOC_050376	Tmem27	NA	0	0.586885
						XLOC_050378	Ace2	NA	0	1.41605
						XLOC_050474	Rpl22-ps1	NA	0	2.14314
						XLOC_050509	Cybb	NA	7.46405	0.6333
						XLOC_050721	Rhox8	NA	0	0.706151
						XLOC_050727	Btg1-ps2	NA	0	0.754607
						XLOC_050729	Rhox12	ENSMUSG00000071766	0	1.25389
						XLOC_050786	Smarca1	NA	0.674562	8.27238
						XLOC_050837	Gm28730,Mir322	NA	0	0.950162
						XLOC_050840	C430049B03Rik	NA	0.552522	18.4588
						XLOC_050841	Plac1	NA	0	1.24873
						XLOC_050885	Fgf13	NA	0	0.884465
						XLOC_050899	Sox3	ENSMUSG00000045179	0	2.37479
						XLOC_050921	Gm14681	NA	0	1.81167
						XLOC_051100	Gm7173	NA	0	1.15853
						XLOC_051247	Gm20489,Gm614,Il2rg	ENSMUSG00000092463;ENSMUSG00000090141;ENSMUSG00000031304	75.4217	8.70732
						XLOC_051263	Cited1	NA	0.728588	61.1701
						XLOC_051286	Gm6206	NA	0	1.52211
						XLOC_051292	Gm9785	NA	0.475172	0
						XLOC_051332	Magt1	ENSMUSG00000031232	3.70894	24.3103
						XLOC_051334	Fnd3c2	NA	0	0.418154
						XLOC_051339	Gm6325	NA	0	0.614287
						XLOC_051346	Zcchc5	ENSMUSG00000047686	0	0.613521
						XLOC_051358	Hmgn5	ENSMUSG00000031245	5.34896	58.0936
						XLOC_051366	Rps6ka6	NA	0.0830984	4.32567
						XLOC_051376	Chm	NA	0.130317	3.46969
						XLOC_051468	Sytl4	ENSMUSG00000031255	0.507962	8.27744
						XLOC_051479	Gm10344	NA	0	0.736104
						XLOC_051543	Ripply1	ENSMUSG00000072945	0.76528	0
						XLOC_051570	Acsl4	NA	4.84476	31.6419
						XLOC_051771	Mospd2	NA	0.457492	7.60495
						XLOC_051784	Gm8817	NA	1.99244	0
						XLOC_051790	Prps2	NA	7.43409	52.0542

## Sheet: Co-DEGs.FPKM
Supplementary Data Sheet 2: Co-differentially expressed genes.
GeneID	Gene	Description	FAD6	CD6A	FBD6	CD6B	FID8	CD8
XLOC_038610	Pik3c2g	ENSMUSG00000030228	0.307185	202.037	0.072628	179.06	0.485775	186.283
XLOC_015495	Agxt2,Gm21973,Prlr	ENSMUSG00000089678;ENSMUSG00000005268	2.03304	21.1348	0.190474	18.741	2.11452	19.4971
XLOC_003453	Hsd17b7	ENSMUSG00000026675	2.02895	85.8297	0.861256	76.1	3.57672	79.1586
XLOC_015161	Ephx2	ENSMUSG00000022040	1.47927	324.637	3.33253	287.92	3.63544	299.5
XLOC_035386	Dnah10	ENSMUSG00000038011	0.0953016	1.80464	0.0265945	1.60011	0.132234	1.66487
XLOC_038391	A2m	ENSMUSG00000030111	12.788	178.246	2.68657	158.075	2.71198	164.439
XLOC_000344	1500015O10Rik	ENSMUSG00000026051	25.5359	121.446	2.01616	107.737	9.7387	112.05
XLOC_043523	Folr1	ENSMUSG00000001827	1.95109	33.8735	0.686228	30.0581	4.16612	31.2642
XLOC_022578	Slc18a2	ENSMUSG00000025094	1.29143	23.3706	0.490447	20.7266	1.34773	21.5591
XLOC_047982	Sc5d	ENSMUSG00000032018	5.38492	77.7988	1.68787	68.9641	16.5722	71.7467
XLOC_009593	Coch	ENSMUSG00000020953	20.7781	50.4242	1.09805	44.7201	0.263819	46.5143
XLOC_012735	Susd3	ENSMUSG00000021384	0.97618	19.0773	0.517437	16.9282	0	17.6051
XLOC_030306	Fndc7	ENSMUSG00000045326	0.308474	6.98135	0.212805	6.19593	0.90906	6.44413
XLOC_026758	Frmd5	ENSMUSG00000027238	0.0912994	11.1508	0.351056	9.889	0.0140265	10.2878
XLOC_048122	Fdx1	ENSMUSG00000032051	51.2026	835.996	26.9375	741.238	46.2125	771.221
XLOC_000663	Inha	ENSMUSG00000032968	5.23368	431.31	14.1005	382.868	1.53781	398.148
XLOC_048718	Slc38a3	ENSMUSG00000010064	0.200961	4.87298	0.160543	4.32205	0	4.49617
XLOC_023045	Pank1	ENSMUSG00000033610	7.43651	30.2407	1.07765	26.8181	4.35696	27.9001
XLOC_003892	Vnn1	ENSMUSG00000037440	0.537782	72.3941	2.80679	64.2018	4.33121	66.796
XLOC_006322	Gdf9	ENSMUSG00000018238	0.540647	21.4229	0.914008	19.0018	0.167655	19.7654
XLOC_034105	Abcb1b	ENSMUSG00000028970	18.7573	109.479	6.08463	97.0692	11.4584	100.991
XLOC_014198	Stc1	ENSMUSG00000014813	3.52156	22.3132	1.274	19.7906	3.74513	20.589
XLOC_010442	Prkar2b	ENSMUSG00000002997	4.56406	53.3536	3.04542	47.2965	3.1535	49.2043
XLOC_021861	Lipg	ENSMUSG00000053846	5.06808	33.7704	2.05121	29.9601	3.44022	31.1629
XLOC_012651	Nrn1	ENSMUSG00000039114	11.598	44.9896	2.84327	39.9052	3.58438	41.5169
XLOC_013112	Thbs4	ENSMUSG00000021702	7.33187	21.9265	1.55897	19.451	2.85202	20.2308
XLOC_002484	Idh1	ENSMUSG00000025950	36.3781	288.456	21.6672	255.833	45.9877	266.127
XLOC_051358	Hmgn5	ENSMUSG00000031245	27.2207	65.5316	5.34896	58.0936	12.2243	60.4613
XLOC_039321	Atoh8	ENSMUSG00000037621	54.9368	121.929	10.7399	108.179	1.53335	112.534
XLOC_046737	Cryab	ENSMUSG00000032060	186.456	605.298	67.7373	536.774	83.055	558.548
XLOC_022260	Aldh1a1	ENSMUSG00000053279	2.07248	158.604	18.379	140.659	37.2783	146.307
XLOC_025821	Ptges	ENSMUSG00000050737	12.8579	55.8462	10.3984	49.554	4.30534	51.5337
XLOC_019338	Ptk7	ENSMUSG00000023972	0.645436	12.5798	24.3467	11.1499	0.891503	11.6029
XLOC_018541	Tmprss2	ENSMUSG00000000385	40.5491	6.42562	29.4168	5.69866	21.9856	5.92752
XLOC_036830	Tmem119	ENSMUSG00000054675	32.4755	12.2642	70.0868	10.8853	69.1445	11.3219
XLOC_048911	Cdcp1	ENSMUSG00000035498	5.30074	1.59651	10.4247	1.41619	9.16743	1.47309
XLOC_025666	Pax8	ENSMUSG00000026976	21.7142	5.99012	44.3102	5.31175	26.23	5.52634
XLOC_034474	Jakmip1	ENSMUSG00000063646	3.2802	0.520856	4.05505	0.461935	4.7554	0.480534
XLOC_021933	Cndp2	ENSMUSG00000024644	126.95	50.1577	392.448	44.4962	293.365	46.2871
XLOC_004965	Enpp3	ENSMUSG00000019989	84.5724	18.2514	147.374	16.1858	73.3589	16.8375
XLOC_042298	Cblc	ENSMUSG00000040525	12.5792	2.45969	20.9344	2.18246	38.4559	2.2707
XLOC_045056	Hsd11b2	ENSMUSG00000031891	187.832	35.5723	350.919	31.5602	216.028	32.8222
XLOC_006615	Cldn7	ENSMUSG00000018569	63.2378	13.2141	210.522	11.7193	429.158	12.1908
XLOC_022954	Fam189a2	ENSMUSG00000071604	42.8193	8.51401	141.121	7.55304	50.6279	7.85583
XLOC_001191	Gm28040,Golt1a,Kiss1	ENSMUSG00000098306;ENSMUSG00000103421;ENSMUSG00000102367	1.71977	0.16566	6.75987	0.146908	5.01219	0.152849
XLOC_048140	Cyp19a1	ENSMUSG00000032274	0	4.63288	0	4.10783	0	4.27325
XLOC_038104	Atp6v1b1	ENSMUSG00000006269	0	0.781328	0	0.692849	0	0.720896
XLOC_046741	Btg4	ENSMUSG00000032056	0	2.62777	0	2.33052	0	2.42397
XLOC_011314	Calm4	ENSMUSG00000033765	0	0.769571	0	0.682651	0	0.709945
XLOC_020745	Fshr	ENSMUSG00000032937	0	11.9996	0	10.6376	0	11.0684
XLOC_016947	Wnt10b	ENSMUSG00000022996	0.558456	36.7744	0	32.624	0	33.9281
XLOC_020747	Nrxn1	ENSMUSG00000024109	0	1.15178	0	1.02133	0.0766674	1.06249
XLOC_010028	Serpina5	ENSMUSG00000041550	0	10.7971	0	9.57638	0	9.96312
XLOC_031562	C8b	ENSMUSG00000029656	0	0.635657	0	0.563935	0	0.586421
XLOC_026426	Olfr1250	ENSMUSG00000075078	0	1.79224	0	1.58891	0	1.65267
XLOC_005823	Olfr810	ENSMUSG00000069421	0	5.57935	0	4.94649	0	5.14575
XLOC_033357	Klf17	ENSMUSG00000048626	0	0.673901	0	0.597813	0	0.621845
XLOC_050899	Sox3	ENSMUSG00000045179	0	2.67829	0	2.37479	0	2.4713
XLOC_018976	Umodl1	ENSMUSG00000054134	0	1.85231	0	1.64222	0	1.70856
XLOC_044965	Drc7	ENSMUSG00000031786	0	1.4394	0	1.27604	0	1.32776
XLOC_045068	Tsnaxip1	ENSMUSG00000031893	0	3.00848	0	2.66714	0	2.77538
XLOC_015302	Lect1	ENSMUSG00000022025	1.02641	33.5264	0	29.7178	0	30.9252
XLOC_008564	Gas2l2	ENSMUSG00000020686	0	0.6889	0	0.611248	0	0.635888
XLOC_008949	Pyy	ENSMUSG00000017311	2.55374	36.5693	0	32.4325	0	33.7422
XLOC_018827	Dcpp1,Dcpp2	ENSMUSG00000096445;ENSMUSG00000096278	0	9.63046	0	8.54176	0	8.88466
XLOC_046705	Apoa4	ENSMUSG00000032080	0	9.75447	0	8.6542	0	9.0026
XLOC_014921	Rnase2a	ENSMUSG00000047222	0	7.47064	0	6.62229	0	6.88863
XLOC_013798	Ear6	ENSMUSG00000062148	0	2.92306	0	2.59236	0	2.6965
XLOC_014920	Ang2	ENSMUSG00000047894	0	2.0726	0	1.83858	0	1.91264
XLOC_015292	Zfp957	ENSMUSG00000071262	0	0.51911	0	0.460391	0	0.47885
XLOC_048395	Dppa5a	ENSMUSG00000060461	0	7.75732	0	6.87903	0	7.15701
XLOC_008244	Dnah9	ENSMUSG00000056752	0.0355801	2.89073	0	2.56413	0	2.66753
XLOC_047714	Hephl1	ENSMUSG00000031936	0.192042	2.54966	0	2.26067	0	2.35174
XLOC_029309	Gm1527	ENSMUSG00000074655	0	1.38385	0	1.22711	0	1.27668
XLOC_011552	Prl3c1	ENSMUSG00000017922	11.5988	218.055	0	193.291	0	201.141
XLOC_000912	Aqp12	ENSMUSG00000045091	0	0.897364	0	0.796201	0	0.828043
XLOC_004227	Slc5a4a	ENSMUSG00000020229	0	2.72669	0	2.41813	0	2.51566
XLOC_029864	Hcn3	ENSMUSG00000028051	0.522649	6.93473	0	6.15158	0.166713	6.39906
XLOC_015923	Cyp2d12	ENSMUSG00000096852	0	1.73352	0	1.53729	0	1.59932
XLOC_016820	Efcab6	ENSMUSG00000022441	0.0415236	0.83268	0	0.738384	0.0174323	0.768321
XLOC_009535	Efcab10	ENSMUSG00000020562	0	2.76706	0	2.45489	0	2.55334
XLOC_028351	Tchhl1	ENSMUSG00000027908	0	0.420505	0	0.372797	0	0.387891
XLOC_047026	Bcl2l10	ENSMUSG00000032191	0	10.9129	0	9.67757	0	10.066
XLOC_041966	Rfpl4	ENSMUSG00000035191	0	4.24486	0	3.76473	0	3.91626
XLOC_046662	Ccdc153	ENSMUSG00000070306	0	17.5367	0	15.557	0	16.1824
XLOC_022817	Ms4a10	ENSMUSG00000024731	0	1.65976	0	1.47193	0	1.53142
XLOC_047636	Nlrp4g	ENSMUSG00000079741	0	0.831143	0	0.737133	0	0.766737
XLOC_047056	Omt2b	ENSMUSG00000038750	0	5.90981	0	5.23935	0	5.45003
XLOC_036392	Zar1	ENSMUSG00000063935	0	11.1958	0	9.92945	0	10.3313
XLOC_022449	Cnnm1	ENSMUSG00000025189	0	9.88308	0	1.49576	0	5.55609
XLOC_018319	Gm813	ENSMUSG00000075002	0	4.74703	0	4.20868	0	4.37921
XLOC_039919	E330021D16Rik	ENSMUSG00000045291	0	5.06673	0	4.49321	0	4.67421
XLOC_048778	Fbxw26	ENSMUSG00000059547	0	2.5057	0	2.22165	0	2.31117
XLOC_035357	Lrrc43	ENSMUSG00000063409	0	1.44382	0	1.28051	0	1.33218
XLOC_034948	1700007G11Rik	ENSMUSG00000057816	0	1.67725	0	1.48704	0	1.54717
XLOC_009879	Vrtn	ENSMUSG00000071235	0	0.880219	0	0.812176	0	0.780885
XLOC_048768	Fbxw22	ENSMUSG00000070324	0	2.19378	0	1.94566	0	2.02375
XLOC_016575	Gml	ENSMUSG00000068349	0	0.794219	0	0.70444	0	0.732555
XLOC_024939	Cfap61	ENSMUSG00000037143	0.0629393	1.5902	0	1.40956	0	1.46658
XLOC_033137	Gm12695	ENSMUSG00000078639	0	0.665445	0	0.590071	0	0.614025
XLOC_034298	Gm10471	ENSMUSG00000073116	0	1.06992	0	0.949016	0	0.987382
XLOC_034904	AA792892	ENSMUSG00000073497	0	0.597873	0	0.530111	0	0.551413
XLOC_048761	Fbxw13	ENSMUSG00000049314	0	0.746978	0	0.66215	0	0.688989
XLOC_050138	E230019M04Rik	ENSMUSG00000042433	0	0.60068	0	0.532527	0	0.554
XLOC_040569	2200002J24Rik	ENSMUSG00000013083	0	2.81343	0	2.49501	0	2.59689
XLOC_018288	Zpld1	ENSMUSG00000064310	0	6.50698	0	5.76891	0	6.00138
XLOC_015217	Sftpc	ENSMUSG00000022097	0	2.11024	0	1.87074	0	1.94619
XLOC_017082	Gtsf1	ENSMUSG00000022487	0	1.30444	0	1.15645	0	1.20316
XLOC_045658	Trim75	ENSMUSG00000071089	0	0.863224	0	0.76545	0	0.79629
XLOC_044937	Mt4	ENSMUSG00000031757	12.8368	181.169	0	160.733	0	167.166
